# Supplementary material for: Transcription rate strongly affects splicing fidelity and cotranscriptionality in budding yeast
Source: Genome Res. 2018 Feb;28(2):203–13. doi: 10.1101/gr.225615.117 (PMC5793784; doi:10.1101/gr.225615.117)
Supplement: Supplemental Material [file supp_gr.225615.117_Supplemental_Table_S1.xlsx]

## Sheet: Readme
Overlapping_with_other
Alternative splicing events with 5 supporting reads (in at least one of the samples) and their overlaping with Kawashima et al (2014), Schreiber et al (2015) and Gould et al (2016)
244_Alternative_splicing_events
Alternative splicing events that are supported by at least 5 reads in both replicates of one or more strains.
New_introns
Novel intons that are supported by at least 5 reads in both replicates of one or more strains. This data also contain information about the genes that have a novel intron in their second exon like RPL30, indicated by "newintron_introncontaining" in event column.

## Sheet: Overlapping_with_others
chromosome	start	end	5'SS_3'SS	strand	shift	event	Novel_reads_FAST_A	Novel_reads_FAST_B	Novel_reads_SLOW_A	Novel_reads_SLOW_B	Novel_reads_WT_A	Novel_reads_WT_B	SEF_FAST_A	SEF_FAST_B	SEF_SLOW_A	SEF_SLOW_B	SEF_WT_A	SEF_WT_B	gene	Gould_et_al_branchpoint nucleotide	Gould_et_al_branchpoint sequence	Overlap between novel splicing events found in this work with those in recent reports
VIII	354808	354955	GTATA_GATAG	+	57	u5	5	28	0	0	16	6	0.00502008	0.0281407	0	0	0.0172043	0.00711744	EPT1	354926	TACTAAC
X	387349	387449	GTAGG_AACAG	-	14	u5	5	5	7	3	17	6	0.0144928	0.0117371	0.04375	0.00940439	0.0994152	0.028436	BET4	387380	TACTGAC
XIV	534875	534980	GTCTG_TGCAG	-	15	u5	5	11	10	3	13	0	0.0170068	0.0241228	0.0330033	0.0110294	0.058296	0	YNL050C	534915	TACTAAC		Schreiber et al
XII	819331	819796	GTATG_AGAAG	+	19	d3	5	5	0	0	0	0	0.000126374	0.000135796	0	0	0	0	RPL26A	0	non
XV	93844	94195	GTAAG_TTTAG	-	95	d5	5	39	0	27	0	23	5.19e-05	0.00040581	0	0.000336957	0	0.00028795	RPL18A	93868	TACTAAC
IV	733686	733775	GTATG_AACAG	-	17	d3	5	15	21	35	41	14	0.000963948	0.00259516	0.00381264	0.0055857	0.00974566	0.00315102	RUB1	733713	TACTAAC	Gould et al	Schreiber et al
XIII	732466	733034	GTATG_TGAAG	+	159	d3	6	7	3	4	5	6	7.86e-05	9.55e-05	5.46e-05	6.13e-05	7.7e-05	0.000105127	RPS10B	732835	TACTAAC		Schreiber et al
XIV	622945	623300	GTATG_AGTAG	+	14	d3	6	13	0	17	15	0	0.00551471	0.0143646	0	0.0160075	0.0169875	0	HRB1	623270	TACTAAT			Kawashima et al
XVI	404941	405457	GTATA_AACAG	+	16	u5	6	8	0	10	16	8	0.00176005	0.00224845	0	0.00134753	0.00204212	0.00129366	RPS9A	405426	CACTAAC
XII	522674	523028	GTAGT_AATAG	+	4	d5	6	20	10	0	0	0	0.0001332	0.000496192	0.000325362	0	0	0	RPL37A	522716	TATTGAC
XVI	654474	654570	GTATA_TACAG	+	306	d5	6	17	0	0	0	0	4.94e-05	0.000148368	0	0	0	0	RPL43A	654534	TACTAAC
XI	158805	158966	GTATG_AACAG	+	189	d5	7	13	0	0	12	1	0.000504905	0.000962108	0	0	0.000729705	6.89e-05	RPS27A	0	non
XVI	795030	795422	GTATG_AGAAG	+	28	d3	7	6	0	0	2	8	7.96e-05	6.55e-05	0	0	2.47e-05	0.000104361	RPS23B	0	non		Schreiber et al
III	101634	101790	GTATG_AATAG	-	90	u5	7	8	0	0	0	0	0.00906736	0.00940071	0	0	0	0	YCL012C	101646	TACTAAC		Schreiber et al
VII	556132	556307	GTACG_AATAG	+	301	d5	7	5	0	4	0	0	6.22e-05	4.58e-05	0	4.73e-05	0	0	RPL26B	556282	TACTAAC
XIV	331728	331837	GTTAT_TTTAG	+	402	d5	7	9	0	0	0	0	0.00014479	0.000193773	0	0	0	0	RPL42A	331803	TACTAAC
XII	987142	987221	GTATG_CTAAG	+	9	d3	8	39	13	13	17	16	0.0154143	0.120743	0.0331633	0.0262626	0.0491329	0.0448179	TDA5	987204	AACTAAC	Gould et al	Schreiber et al	Kawashima et al
VII	543639	543755	GTATG_TTCAG	+	34	d3	8	13	0	8	0	0	0.0039312	0.00708833	0	0.00396629	0	0	ERV1	543691	TCCAATC		Schreiber et al
IV	1355268	1355550	GTACG_TTAAG	-	31	u3	8	7	10	9	12	4	0.000235004	0.000182168	0.000458674	0.000324476	0.000420551	0.000165837	RPS17B	0	non
XII	987142	987339	GTATG_TTAAG	+	127	d3	9	6	20	6	8	20	0.017341	0.0185759	0.0510204	0.0121212	0.0231214	0.0560224	TDA5	987241	GTCTAAC		Schreiber et al	Kawashima et al
II	426494	426873	GTATG_ACTAG	-	23	d3	9	7	7	37	0	12	0.00436258	0.00389538	0.00334768	0.0144757	0	0.00780742	YBR090C	426524	TACTAAC
IV	254949	255044	GTATG_TGAAG	-	26	d3	9	26	0	23	0	0	0.0248619	0.0890411	0	0.0608466	0	0	IWR1	254999	GACTAAC		Schreiber et al
VII	555831	555912	GTATG_AAGAG	+	395	u3	9	15	0	0	0	0	8e-05	0.000137257	0	0	0	0	RPL26B	555885	CACGAAA
VIII	129216	129647	GTATG_AGTAG	+	313	u5	9	10	0	0	0	0	0.00519031	0.00589275	0	0	0	0	VPS29	129590	AACTTCC
X	608483	608581	GTAGG_TGCAG	+	176	d5	9	11	0	11	0	0	0.000409612	0.000483942	0	0.000810134	0	0	RPL43B	608540	TACTAAC	Gould et al
XII	522817	523028	GTATG_AATAG	+	147	d5	9	8	0	10	0	0	0.0001998	0.000198477	0	0.000271429	0	0	RPL37A	522984	TACTAAC
XIII	223235	223781	GTATG_AGAAG	-	146	d3	9	10	0	3	0	0	0.000211904	0.000211318	0	6.64e-05	0	0	RPS18B	223421	TACTAAC		Schreiber et al
XV	80361	80779	GTATG_CTAAG	+	5	d3	9	6	0	0	0	2	8.52e-05	5.87e-05	0	0	0	2.41e-05	RPL25	0	non
XVI	305307	305422	GTATG_AAAAG	+	11	d3	9	6	29	2	0	7	0.0064982	0.00380711	0.0282651	0.00137552	0	0.00535578	TAF14	305374	TACTAAC
VIII	126637	127112	GTATA_CACAG	+	85	d5	10	18	0	6	2	1	0.000146284	0.000248221	0	9.77e-05	2.84e-05	1.52e-05	RPL27A	0	non
XIII	337818	337917	GTACG_CCCAG	+	14	d3	10	32	0	14	16	24	0.00639386	0.0219629	0	0.00790961	0.0183066	0.018251	ARP9	337886	TACTAAC			Kawashima et al
XIV	443781	444171	GTATG_CCCAG	-	46	d3	10	11	18	0	2	46	0.000364339	0.000455751	0.000838926	0	6.55e-05	0.00182837	RPS7B	0	non
XVI	404957	405467	GTACG_CCAAG	+	10	d3	10	10	27	17	36	9	0.00293341	0.00281057	0.00429458	0.0022908	0.00459477	0.00145537	RPS9A	405426	CACTAAC			Kawashima et al
VIII	104406	104696	GTATG_TGTAG	+	107	u3	10	6	4	4	0	0	0.000342032	0.000216982	0.000240761	0.00017696	0	0	RPL14B	0	non
XII	744158	744239	GTAGA_GTGAG	+	52	d5u3	10	12	0	0	0	0	0.0373134	0.0236686	0	0	0	0	UBC12	744219	TACTAAC
XVI	654168	654579	GTATG_AAAAG	+	9	d3	10	24	12	0	0	0	8.23e-05	0.000209461	0.000224782	0	0	0	RPL43A	654534	TACTAAC			Kawashima et al
IV	1450458	1450590	GTGAG_AACAG	-	256	d5	10	6	0	6	10	0	0.000108573	7.59e-05	0	0.0001037	0.000137895	0	RPL37B	1450485	TACTAAC
XII	242322	242712	GTATG_GCTAG	+	32	d3	11	10	0	11	14	1	0.000191501	0.000181068	0	0.000246725	0.000301542	2.22e-05	RPS0B	242652	TACTAAC		Schreiber et al
XIII	225892	226294	GTATG_GGTAG	+	5	d3	11	77	41	18	6	0	0.00010134	0.000747863	0.000714448	0.000241232	5.86e-05	0	RPS17A	0	non
XIII	732466	732878	GTATG_AGAAG	+	3	d3	11	8	10	2	18	0	0.000144068	0.000109146	0.000181977	3.06e-05	0.000277034	0	RPS10B	732835	TACTAAC
II	726826	727011	GTATG_TATAG	-	92	d3	12	15	17	13	15	17	0.0227704	0.0331858	0.0337972	0.0167742	0.0297619	0.0502959	YBR255C-A	726947	CGCTAAC		Schreiber et al
XIII	666947	667017	GTATG_ATGAG	-	13	u3	12	20	0	9	0	0	0.0481928	0.0566572	0	0.0261628	0	0	RAD14	666961	TACTAAC
IV	1450458	1450540	GTTGT_AACAG	-	306	d5	12	12	11	3	3	1	0.000130288	0.000151751	0.000237535	5.19e-05	4.14e-05	1.68e-05	RPL37B	1450485	TACTAAC
XII	819331	819793	GTATG_GACAG	+	16	d3	13	40	3	8	37	12	0.000328573	0.00108637	0.000129077	0.000261703	0.000952111	0.000360436	RPL26A	0	non
VII	555831	556323	GTATG_GACAG	+	16	d3	13	17	1	0	25	7	0.000115522	0.000155558	1.55e-05	0	0.000258006	7.74e-05	RPL26B	555885	CACGAAA
VII	556226	556307	GTGTG_AATAG	+	395	d5	13	8	0	0	1	0	0.000115522	7.32e-05	0	0	1.03e-05	0	RPL26B	556282	TACTAAC
XIV	62371	62923	GTACG_TAGAG	-	2	d3	14	29	33	36	13	18	0.000238651	0.00049287	0.000915598	0.000772897	0.000262568	0.000398309	RPS19B	62407	TACTAAC	Gould et al	Schreiber et al
X	435232	435343	GTATA_AATAG	+	4	d5	14	27	15	19	0	8	0.00243267	0.00485262	0.00329092	0.00301157	0	0.00213049	PRE3	435281	AAGTAAA
V	396811	397431	GTATG_AAAAG	+	150	d3	14	8	25	10	4	2	0.00015548	9.63e-05	0.000445927	0.000132155	4.52e-05	2.74e-05	RPL23B	397225	TACTAAC
IV	715246	715358	GTATG_TAGAG	-	2	d3	15	21	31	15	3	0	0.00265581	0.00375738	0.00794261	0.00248057	0.00061894	0	SAC6	715265	TACTAAC
IV	715192	715358	GTATG_TTCAG	-	56	d3	16	38	39	34	2	37	0.00283286	0.00679907	0.00999231	0.00562262	0.000412626	0.00832958	SAC6	715265	TACTAAC		Schreiber et al
VII	311229	311526	GTACT_TACAG	+	213	d5	16	24	11	15	30	4	0.000138206	0.000202968	0.000145015	0.00014026	0.000291752	3.88e-05	RPL28	311486	TACTAAC	Gould et al	Schreiber et al
VII	556228	556307	GTGGA_AATAG	+	397	d5	17	37	0	7	0	0	0.000151067	0.000338567	0	8.28e-05	0	0	RPL26B	556282	TACTAAC
IV	117667	118170	GTATG_TAAAG	+	13	d3	17	12	0	11	47	4	0.000248782	0.000175688	0	0.000268719	0.00103595	0.000109296	RPL35A	0	non
XIV	145181	145254	GTATG_AGAAG	-	31	u3	17	15	16	12	0	17	0.0564784	0.0420168	0.0322581	0.0184332	0	0.0413625	IST1	145191	TACTAAC
IV	1450456	1450846	GTATG_CAGAG	-	2	d3	17	15	0	17	12	13	0.000184574	0.000189689	0	0.000293818	0.000165474	0.000218759	RPL37B	1450485	TACTAAC
II	333321	333386	GTAGG_TACAG	+	445	d5	18	21	0	11	27	1	0.000271534	0.000327302	0	0.000235309	0.000486881	2.08e-05	RPS11B	333365	TACTAAC		Schreiber et al
IV	254943	255044	GTATG_AGCAG	-	32	d3	18	8	9	16	15	1	0.0497238	0.0273973	0.0254958	0.042328	0.103448	0.00518135	IWR1	254999	GACTAAC		Schreiber et al
II	60150	60697	GTATG_AACAG	-	44	d3	19	26	64	3	1	43	0.000315499	0.000411171	0.00166182	5.64e-05	1.84e-05	0.00086874	RPL23A	0	non	Gould et al	Schreiber et al
II	186266	186427	GTATG_CGTAG	-	87	d3	19	8	8	4	25	11	0.0167549	0.00658436	0.00467563	0.00176835	0.0151149	0.00650888	POP8	186375	TACTAAC		Schreiber et al
IV	1401801	1402404	GTACG_ACCAG	+	220	d3	19	8	0	5	0	0	0.00106856	0.000418717	0	0.000248151	0	0	RPL27B	0	non		Schreiber et al
XII	242322	242826	GTATG_TCCAG	+	146	d3	19	42	7	15	0	17	0.000330774	0.000760484	0.000223079	0.000336444	0	0.000377384	RPS0B	242652	TACTAAC	Gould et al	Schreiber et al	Kawashima et al
XII	522670	523030	GTATG_TAGAG	+	2	d3	19	9	0	0	0	0	0.0004218	0.000223286	0	0	0	0	RPL37A	522716	TATTGAC
IX	47703	47760	GTACC_GTTAG	+	4	d5	19	8	3	12	10	2	0.014786	0.00442968	0.00256191	0.00652884	0.00705716	0.00142653	YIL156W-B	47743	TACTAAC
XIII	666909	667017	GTATG_AATAG	-	25	d3	20	19	20	46	27	25	0.0803213	0.0538244	0.0493827	0.133721	0.134328	0.095057	RAD14	666961	TACTAAC		Schreiber et al
II	592398	592768	GTATG_CCCAG	-	19	d3	20	9	0	0	0	3	0.000299855	0.000136897	0	0	0	5.37e-05	RPS6B	592709	CGCTAAC
XII	931336	931698	GTATG_GTCAG	-	14	d3	21	61	63	69	14	58	0.00111483	0.00317526	0.0033944	0.00288679	0.000600549	0.00262812	RPL31B	0	non		Schreiber et al
XV	505938	506030	GTATG_TCTAG	+	308	u3	21	32	0	0	4	11	0.000265272	0.000407208	0	0	5.21e-05	0.000164135	RPS7A	505980	GAGTAAC		Schreiber et al	Kawashima et al
X	608307	608588	GTATG_CTAAG	+	7	d3	21	8	0	0	0	0	0.000955762	0.000351958	0	0	0	0	RPL43B	608540	TACTAAC
IV	579479	580024	GTATG_TAAAG	+	7	d3	21	38	6	20	8	52	0.000317225	0.000558208	0.000159847	0.00036537	0.000130619	0.000895039	RPS13	579963	TACTAAC		Schreiber et al	Kawashima et al
XIII	753743	754215	GTAAA_ATCAG	-	4	d5	22	17	0	2	6	14	0.000770092	0.000548458	0	9.7e-05	0.00023819	0.00063174	RPL20A	753788	TACTAAC
XV	900768	901174	GTATG_AACAG	-	19	d5	22	20	0	1	13	0	0.000613582	0.000555586	0	3.4e-05	0.000387124	0	RPL20B	900802	TACTAAC
XV	912171	912432	GTATG_CTTAG	-	85	u3	23	21	25	25	24	3	inf	inf	inf	inf	inf	inf	YOR318C	0	non
IV	65307	65403	GTATG_CCTAG	+	26	d3	23	19	27	89	45	9	0.0119729	0.00648022	0.0138249	0.02948	0.0178784	0.0037594	DTD1	65358	TACTAAC
XV	867150	867589	GTATG_AGAAG	+	3	d3	23	48	11	20	0	16	0.000252	0.000515337	0.00015611	0.000234099	0	0.000200476	RPS10A	867516	TACTAAC		Schreiber et al
V	269788	270148	GTATG_ATGAG	-	36	u3	23	24	5	5	20	30	0.000335287	0.000438188	0.000101106	9.37e-05	0.000293979	0.000553036	RPL34A	269803	TACTAAC		Schreiber et al
VIII	126548	127112	GTTGG_CACAG	+	4	u5	23	39	36	48	49	47	0.000336454	0.000537812	0.000777135	0.000781874	0.000695568	0.000712618	RPL27A	0	non		Schreiber et al
X	73797	74216	GTACG_TCAAG	+	12	d3	24	27	0	0	1	5	0.00205216	0.00277407	0	0	7.02e-05	0.000469616	RPS14B	74178	TACTAAC
XI	437838	437925	GTATG_GAAAG	+	20	d3	24	30	33	10	20	38	0.0152284	0.0217707	0.0252101	0.00615385	0.0182482	0.0455635	DID4	0	non	Gould et al	Schreiber et al	Kawashima et al
XV	778860	779252	GTATG_GATAG	-	134	d5	24	33	9	10	27	9	0.000728863	0.00104055	0.000455719	0.000389423	0.000789936	0.000304857	RPL33B	778910	TACTAAC	Gould et al
XIII	666786	667017	GTATG_TGCAG	-	148	d3	24	8	0	0	0	15	0.0963855	0.0226629	0	0	0	0.0570342	RAD14	666961	TACTAAC		Schreiber et al
VI	64354	64920	GTACG_AGAAG	-	246	d3	24	15	0	3	21	4	0.0149906	0.0116189	0	0.00118906	0.00735294	0.00160643	RPL22B	64615	TACTAAC	Gould et al	Schreiber et al
II	168601	168808	GTACG_CACAG	+	176	d5	25	12	0	0	0	7	0.000488014	0.000251889	0	0	0	0.000168253	RPL19B	168770	TACTAAC	Gould et al
IV	629906	630056	GTATG_TCCAG	+	117	u3	25	15	18	34	28	8	0.00857633	0.00519931	0.00656695	0.0105689	0.0113269	0.00329625	UBC13	630016	TACTAAC	Gould et al	Schreiber et al	Kawashima et al
VII	727039	727385	GTATG_AGAAG	+	28	d3	25	7	0	13	29	14	0.000478542	0.000145858	0	0.000260172	0.000585977	0.000323385	RPS23A	0	non		Schreiber et al
XIII	82291	82351	GTATG_TTAAG	+	22	u3	26	5	6	10	0	12	0.0312876	0.00621118	0.00688863	0.0104822	0	0.0169014	GIM5	82343	TACTAAC			Kawashima et al
X	75554	76324	GTATG_ATTAG	+	385	u5	27	23	0	0	4	0	0.000648462	0.000537924	0	0	9.93e-05	0	RPL39	76268	TACTAAC
II	393181	393507	GTATG_CTAAG	+	3	u3	27	80	108	143	56	88	0.00380121	0.011554	0.0149834	0.0115743	0.0060698	0.00945931	ECM33	0	non	Gould et al	Schreiber et al	Kawashima et al
XVI	492948	493020	GTATG_ACGAG	-	29	u3	27	49	56	20	62	27	0.0193271	0.0501022	0.0455285	0.014881	0.095679	0.0414747	PHO85	492958	TACTAAC		Schreiber et al
II	653369	653524	GTATG_AACAG	+	72	d3	27	41	31	48	14	46	0.0741758	0.13099	0.108014	0.128686	0.0534351	0.209091	HPC2	653429	GATTAAC	Gould et al	Schreiber et al	Kawashima et al
XIII	666942	667017	GTATG_ATGAG	-	8	u3	28	20	8	9	13	0	0.11245	0.0566572	0.0197531	0.0261628	0.0646766	0	RAD14	666961	TACTAAC		Schreiber et al
XVI	795135	795394	GTAAG_AACAG	+	105	d5	31	18	14	17	10	5	0.000352561	0.000196537	0.00024389	0.000211422	0.000123262	6.52e-05	RPS23B	0	non	Gould et al	Schreiber et al
VII	556156	556307	GTAGG_AATAG	+	325	d5	31	39	3	7	0	2	0.000275475	0.000356868	4.66e-05	8.28e-05	0	2.21e-05	RPL26B	556282	TACTAAC
VIII	251156	251458	GTATG_TACAG	+	210	d3	32	23	0	26	28	3	0.0235641	0.0166425	0	0.0222793	0.0353982	0.00444444	PTC7	251233	GACTAAC		Schreiber et al
XIII	732466	732844	GTATG_GGAAG	+	31	u3	32	89	76	84	47	38	0.000419106	0.00121426	0.00138302	0.001287	0.000723366	0.000665802	RPS10B	732835	TACTAAC		Schreiber et al	Kawashima et al
VI	221264	221410	GTCAG_GGTAG	-	146	d5d3	32	30	12	15	40	13	0.00108298	0.00103107	0.000793074	0.000729076	0.00161063	0.000621772	RPL2A	221291	TACTAAC
VII	555831	555910	GTATG_GCAAG	+	397	u3	32	38	33	37	2	11	0.000284361	0.000347718	0.000512303	0.000437683	2.06e-05	0.000121617	RPL26B	555885	CACGAAA
XVI	305307	305415	GTATG_GACAG	+	4	d3	33	18	25	7	11	44	0.0238267	0.0114213	0.0243665	0.0048143	0.00953206	0.0336649	TAF14	305374	TACTAAC			Kawashima et al
XII	522670	522725	GTATG_TGGAG	+	303	u3	34	19	4	25	0	0	0.000754801	0.000471382	0.000130145	0.000678573	0	0	RPL37A	522716	TATTGAC			Kawashima et al
VIII	138237	138408	GTATG_GGAAG	-	4	d3	35	23	26	18	11	68	0.0276025	0.0188216	0.0290179	0.0140955	0.0133657	0.106918	YSC84	138274	TACTAAC		Schreiber et al
XIII	551952	552510	GTATG_AGAAG	+	15	d3	36	77	14	7	4	22	0.000878949	0.00174035	0.000438858	0.000158845	9.41e-05	0.000528338	RPS16A	0	non	Gould et al
VI	64592	64920	GTACG_TCCAG	-	8	d3	36	13	49	12	75	66	0.0224859	0.0100697	0.0232669	0.00475624	0.0262605	0.026506	RPL22B	64615	TACTAAC		Schreiber et al
XI	625902	625986	GTAAG_TAAAG	+	10	d3	37	24	14	15	24	0	0.0168105	0.0118989	0.00883281	0.00717703	0.0134756	0	PCC1	0	non	Gould et al	Schreiber et al	Kawashima et al
IV	579465	580017	GTATG_AACAG	+	14	u5	37	51	55	14	31	18	0.000558921	0.000749174	0.00146526	0.000255759	0.000506147	0.000309821	RPS13	579963	TACTAAC
X	74114	74204	GTTGT_TATAG	+	317	d5	38	35	92	57	94	139	0.00324925	0.00359601	0.0173095	0.00902756	0.00660251	0.0130553	RPS14B	74178	TACTAAC	Gould et al	Schreiber et al
II	125155	125317	GTATG_TTTAG	+	47	d3	38	26	63	141	64	33	0.0121135	0.0070633	0.0189702	0.0315577	0.0259319	0.0137845	SEC17	125234	TACTAAC		Schreiber et al	Kawashima et al
XV	867150	867539	GTATG_CGGAG	+	47	u3	38	81	45	45	76	58	0.000416347	0.000869631	0.000638633	0.000526722	0.00086754	0.000726726	RPS10A	867516	TACTAAC		Schreiber et al	Kawashima et al
III	101606	101700	GTATG_TCAAG	-	28	d3	39	20	15	6	27	2	0.0505181	0.0235018	0.0239617	0.00896861	0.0465517	0.00344234	YCL012C	101646	TACTAAC	Gould et al	Schreiber et al
V	396771	397281	GTCAG_AATAG	+	40	u5	39	54	16	0	23	8	0.000433122	0.000650195	0.000285393	0	0.000259943	0.0001098	RPL23B	397225	TACTAAC
VI	64592	64856	GTTTG_TCCAG	-	320	d5d3	39	18	45	46	11	12	0.0243598	0.0139427	0.0213675	0.0182323	0.00385154	0.00481928	RPL22B	64615	TACTAAC
VII	556128	556307	GTGAG_AATAG	+	297	d5	39	66	32	31	1	20	0.000346565	0.000603931	0.000496779	0.000366708	1.03e-05	0.000221122	RPL26B	556282	TACTAAC		Schreiber et al
XI	158616	158973	GTATG_TTTAG	+	7	d3	41	50	13	22	15	28	0.0029573	0.00370041	0.00142154	0.00177334	0.000912131	0.00193037	RPS27A	0	non			Kawashima et al
XIV	494520	494973	GTACG_CTAAG	-	5	d3	41	11	11	14	22	3	0.000670384	0.000179051	0.000290936	0.000295971	0.000397535	5.9e-05	RPL16B	494551	TACTAAC
XVI	218647	218726	GTATG_TTGAG	+	20	u3	42	32	21	15	10	16	0.164706	0.0774818	0.3	0.0700935	0.0429185	0.132231	SPT14	218695	GAAGATC		Schreiber et al	Kawashima et al
XVI	412889	412995	GTAAT_AACAG	+	644	d5u3	43	41	23	32	38	36	inf	inf	inf	inf	inf	inf	GCR1	412958	TACTAAC		Schreiber et al
VII	543639	543788	GTATG_TGAAG	+	67	d3	43	11	12	52	7	24	0.0211302	0.00599782	0.00807537	0.0257809	0.00386314	0.0154242	ERV1	543691	TCCAATC		Schreiber et al
XI	618375	618526	GTTTG_TACAG	-	216	d5	44	162	48	69	101	87	0.000835057	0.00310547	0.0017762	0.00189015	0.00232387	0.00215742	RPL40B	0	non	Gould et al	Schreiber et al
XII	242322	242690	GTATG_CCAAG	+	10	d3	44	65	12	7	35	49	0.000766003	0.00117694	0.000382421	0.000157007	0.000753855	0.00108775	RPS0B	242652	TACTAAC	Gould et al	Schreiber et al	Kawashima et al
IX	99096	99414	GTCTG_ACCAG	-	29	u5	44	10	43	0	11	0	0.000997778	0.000243132	0.00164814	0	0.000292841	0	RPL16A	0	non
VII	920665	921129	GTATG_CCAAG	+	10	d3	44	39	91	79	29	36	0.00108198	0.00102715	0.00331391	0.00230967	0.000752387	0.00115607	RPS0A	0	non	Gould et al	Schreiber et al	Kawashima et al
X	156770	157249	GTACG_CCAAG	-	20	d3	45	36	46	37	34	38	0.000738359	0.000559362	0.00102844	0.000574838	0.000532398	0.00066925	RPS21B	0	non		Schreiber et al
XIII	666923	667017	GTATG_AACAG	-	11	d3	45	8	13	28	0	8	0.180723	0.0226629	0.0320988	0.0813953	0	0.0304183	RAD14	666961	TACTAAC	Gould et al	Schreiber et al
VII	62132	62183	GTATG_AAAAG	+	6	u3	45	44	137	194	75	103	0.136364	0.092827	0.143006	0.156958	0.0784519	0.12075	TAN1	62173	TACTAAC	Gould et al	Schreiber et al	Kawashima et al
II	60209	60697	GTATG_TTGAG	-	15	u3	47	50	43	5	2	13	0.000780446	0.000790714	0.00111654	9.4e-05	3.69e-05	0.000262642	RPL23A	0	non	Gould et al	Schreiber et al
IV	399362	399495	GTATG_ATCAG	+	11	d3	47	41	74	82	52	36	0.0130411	0.00969726	0.0202851	0.0172269	0.0146603	0.0131483	ARP2	399468	TACTAAC	Gould et al		Kawashima et al
XII	856989	857057	GTAAG_TTTAG	+	414	d5	49	81	28	62	316	260	0.00326058	0.00560398	0.0031811	0.00602996	0.0263421	0.0264523	RPS22B	857038	TACTAAC		Schreiber et al
IV	579895	580017	GTATG_AACAG	+	416	d5	49	61	14	20	33	31	0.000740192	0.000896071	0.000372975	0.00036537	0.000538802	0.000533581	RPS13	579963	TACTAAC
XVI	406955	407067	GTGTG_AACAG	+	308	d5	50	30	11	37	44	14	0.000978186	0.0006157	0.000362605	0.000835139	0.000972354	0.000335949	RPL21B	407002	TACTAAC		Schreiber et al
II	592673	592768	GTATG_ATTAG	-	256	u3	51	120	24	49	12	14	0.000764629	0.00182529	0.000573545	0.00086263	0.000185503	0.000250627	RPS6B	592709	CGCTAAC
IX	316776	317175	GTTTT_GGTAG	+	399	d5d3	51	24	16	24	59	28	0.000581627	0.000294103	0.000334204	0.000379819	0.000720109	0.000427638	RPL2B	317136	TACTAAC
II	604515	604930	GTACG_AGGAG	+	3	d3	52	45	1	36	18	22	0.000396468	0.000365892	1.31e-05	0.000404972	0.000145289	0.000200642	RPS9B	0	non	Gould et al	Schreiber et al
V	396811	397448	GTATG_TTGAG	+	167	d3	52	9	0	12	30	33	0.000577495	0.000108366	0	0.000158585	0.000339056	0.000452923	RPL23B	397225	TACTAAC
VII	62132	62196	GTATG_TAAAG	+	7	d3	52	46	125	176	176	156	0.157576	0.0970464	0.13048	0.142395	0.1841	0.182884	TAN1	62173	TACTAAC	Gould et al	Schreiber et al	Kawashima et al
IV	715248	715354	GTATG_ATTAG	-	4	d5	53	117	98	121	55	86	0.00938385	0.020934	0.0251089	0.0200099	0.0113472	0.0193606	SAC6	715265	TACTAAC
XIII	424998	425160	GTATG_ACAAG	+	7	d3	54	48	68	18	77	48	0.00797283	0.00871776	0.0143188	0.00316511	0.0149981	0.00934579	SEC14	425094	TATCAAT		Schreiber et al
XIII	551132	551203	GTATG_ACTAG	-	330	u3	55	55	8	3	0	0	0.00186561	0.00175304	0.000546299	0.000130163	0	0	RPL13B	551143	AACTAAT
V	396811	397285	GTATG_GTTAG	+	4	d3	56	107	3	33	44	16	0.000621918	0.00128835	5.35e-05	0.00043611	0.000497282	0.000219599	RPL23B	397225	TACTAAC
IV	1401797	1402184	GTTGG_CGTAG	+	4	u5	57	70	49	45	112	157	0.00320567	0.00366377	0.0034774	0.00223336	0.0054824	0.00766939	RPL27B	0	non	Gould et al
II	60190	60693	GTTAA_GTTAG	-	503	d5d3	58	79	41	64	51	66	0.000963103	0.00124933	0.0010646	0.00120348	0.000940006	0.00133341	RPL23A	0	non
XV	505938	506252	GTATG_ACAAG	+	86	u3	58	18	10	21	36	9	0.000732656	0.000229054	0.00019937	0.000299491	0.000468622	0.000134292	RPS7A	505980	GAGTAAC	Gould et al	Schreiber et al
XVI	794891	795394	GTAAG_AACAG	+	139	u5	62	8	8	0	23	23	0.000705122	8.73e-05	0.000139366	0	0.000283503	0.000300038	RPS23B	0	non		Schreiber et al
IX	316772	317148	GTATG_TCGAG	+	23	u3	62	14	16	6	12	13	0.000707076	0.00017156	0.000334204	9.5e-05	0.000146463	0.000198546	RPL2B	317136	TACTAAC
II	142754	142846	GTATG_TCAAG	-	4	u3	64	87	61	129	84	63	0.0406091	0.0459345	0.0498774	0.0578475	0.0465374	0.0433287	ERD2	142787	TACTAAC	Gould et al	Schreiber et al
VI	221264	221414	GTATG_GGTAG	-	4	d3	64	47	34	79	42	18	0.00216597	0.00161534	0.00224704	0.0038398	0.00169116	0.000860914	RPL2A	221291	TACTAAC
XII	987142	987349	GTATG_CATAG	+	137	d3	66	111	156	152	68	14	0.127168	0.343653	0.397959	0.307071	0.196532	0.0392157	TDA5	987241	GTCTAAC	Gould et al	Schreiber et al	Kawashima et al
VIII	148117	148508	GTATG_TACAG	-	158	d5	67	126	23	12	15	7	0.000677425	0.0013689	0.000418654	0.00015793	0.000163693	8.84e-05	RPS27B	0	non	Gould et al	Schreiber et al
II	366508	366584	GTATG_ATTAG	-	5	u3	69	36	51	55	8	6	0.149351	0.0577849	0.109442	0.0761773	0.0247678	0.0172414	YBR062C	366534	AACTAAC
XV	867398	867586	GTATG_TACAG	+	248	d5	71	37	5	47	13	56	0.000777912	0.000397239	7.1e-05	0.000550132	0.000148395	0.000701666	RPS10A	867516	TACTAAC	Gould et al
XII	327255	327399	GTATG_GTAAG	-	4	d3	72	57	121	92	74	58	0.0601504	0.0417277	0.0907046	0.0517435	0.067029	0.0549763	NYV1	327295	GACTAAC		Schreiber et al
VIII	251156	251258	GTATG_TGCAG	+	10	d3	76	77	98	91	73	55	0.0559647	0.0557164	0.10251	0.0779777	0.0922882	0.0814815	PTC7	251233	GACTAAC		Schreiber et al	Kawashima et al
VIII	148110	148666	GTATG_TTTAG	-	7	d3	78	73	37	28	84	99	0.000788644	0.00079309	0.000673486	0.000368503	0.00091668	0.00124979	RPS27B	0	non		Schreiber et al
X	435228	435316	GTATG_AATAG	+	27	u3	78	33	0	83	33	40	0.0135534	0.00593098	0	0.0131558	0.00688648	0.0106525	PRE3	435281	AAGTAAA		Schreiber et al	Kawashima et al
V	131777	131880	GTATG_CAAAG	+	19	u3	79	94	85	101	17	25	0.225714	0.175047	0.156538	0.119244	0.0594406	0.0615764	UBC8	131853	CACTAAC	Gould et al	Schreiber et al	Kawashima et al
XIII	551952	552507	GTATG_GTAAG	+	12	d3	80	89	50	70	91	88	0.00195322	0.00201157	0.00156735	0.00158845	0.00214123	0.00211335	RPS16A	0	non	Gould et al		Kawashima et al
XI	82999	83081	GTATG_GATAG	+	7	d3	82	125	100	187	95	87	0.0265888	0.0407432	0.0351741	0.0460591	0.0356607	0.035729	CNB1	83061	TACTAAC		Schreiber et al	Kawashima et al
II	604515	604937	GTACG_CCAAG	+	10	d3	82	39	11	35	31	19	0.0006252	0.000317107	0.000144541	0.000393723	0.00025022	0.000173282	RPS9B	0	non
XI	437838	437913	GTATG_CAAAG	+	8	d3	87	66	48	78	20	67	0.055203	0.0478955	0.0366692	0.048	0.0182482	0.0803357	DID4	0	non	Gould et al	Schreiber et al	Kawashima et al
XVI	729354	729481	GTATG_TGTAG	-	32	d3	88	78	98	116	37	33	0.0528529	0.0454016	0.0746382	0.0578842	0.0297667	0.025641	YPR098C	729395	TACCAAC	Gould et al	Schreiber et al
VII	72985	73137	GTACG_GAAAG	-	4	d3	89	106	59	133	63	120	0.0191192	0.0231441	0.0144466	0.0239252	0.0132743	0.0297989	OST5	73034	TACTAAC	Gould et al	Schreiber et al
XV	92441	92521	GTAAT_TACAG	-	309	d5	92	117	4	50	55	43	0.00227452	0.00308097	0.000169355	0.0016921	0.00192355	0.00159887	RPS19A	92476	TACTAAC		Schreiber et al
XVI	412257	412995	GTATG_AACAG	+	750	u5u3	103	174	110	97	84	47	inf	inf	inf	inf	inf	inf	GCR1	412958	TACTAAC	Gould et al
XI	551681	552043	GTATG_AACAG	+	41	d3	107	82	0	110	73	40	0.00192522	0.00144318	0	0.00279606	0.00155903	0.000904302	RPS21A	0	non	Gould et al	Schreiber et al	Kawashima et al
XIII	551124	551203	GTATG_TGTAG	-	322	u3	109	87	60	39	16	16	0.0036973	0.002773	0.00409724	0.00169212	0.000607441	0.000700464	RPL13B	551143	AACTAAT
XV	505938	505995	GTATG_AAAAG	+	343	u3	109	122	96	119	37	39	0.00137689	0.00155248	0.00191395	0.00169711	0.000481639	0.000581933	RPS7A	505980	GAGTAAC	Gould et al		Kawashima et al
XVI	406647	407019	GTATG_AAAAG	+	48	u3	117	129	15	60	112	82	0.00228896	0.00264751	0.000494462	0.00135428	0.00247508	0.0019677	RPL21B	407002	TACTAAC	Gould et al	Schreiber et al	Kawashima et al
XVI	412262	412995	GTATG_AACAG	+	17	u3	117	52	63	63	64	51	inf	inf	inf	inf	inf	inf	GCR1	412958	TACTAAC		Schreiber et al
XIII	551963	552495	GTTCT_TTTAG	+	11	d5	118	169	47	148	144	131	0.002881	0.00381973	0.00147331	0.00335845	0.00338831	0.00314601	RPS16A	0	non
II	60190	60697	GTATG_GTTAG	-	4	d3	121	117	74	101	59	62	0.00200923	0.00185027	0.00192148	0.00189925	0.00108746	0.0012526	RPL23A	0	non	Gould et al	Schreiber et al
XVI	138730	138868	GTTAT_GTCAG	+	138	d5d3	123	118	121	128	55	124	0.00906278	0.00894414	0.00952231	0.00768169	0.00393475	0.0108269	SAR1	0	non
XI	155272	155629	GTATG_AAAAG	+	25	u3	124	64	93	135	37	39	0.222621	0.0990712	0.206667	0.245455	0.0858469	0.102632	APE2	0	non		Schreiber et al	Kawashima et al
XV	867154	867541	GTTTT_GAGAG	+	49	d5u3	125	90	45	188	122	174	0.00136956	0.000966256	0.000638633	0.00220053	0.00139263	0.00218018	RPS10A	867516	TACTAAC
IX	47699	47764	GTAAG_GGTAG	+	4	d3	125	189	95	192	111	145	0.0972763	0.104651	0.0811272	0.104461	0.0783345	0.103424	YIL156W-B	47743	TACTAAC		Schreiber et al	Kawashima et al
II	426517	426630	GTAAG_CTTAG	-	243	d5	129	44	195	170	78	99	0.0625303	0.0244853	0.0932568	0.0665102	0.0417335	0.0644112	YBR090C	426524	TACTAAC	Gould et al
XIV	350958	351060	GTATG_ATCAG	+	7	d3	138	176	66	133	107	135	0.0733262	0.0878244	0.037225	0.0579521	0.0678503	0.0814234	LSM7	351021	TACTAAC		Schreiber et al	Kawashima et al
XVI	412313	412995	GTATG_AACAG	+	68	d5u3	143	82	77	90	103	42	inf	inf	inf	inf	inf	inf	GCR1	412958	TACTAAC	Gould et al
XIV	62362	62923	GTACG_TGCAG	-	11	d3	152	194	113	80	77	155	0.00259107	0.00329713	0.00313523	0.00171755	0.00155521	0.00342989	RPS19B	62407	TACTAAC	Gould et al
XII	744154	744239	GTACG_GTGAG	+	48	u3	156	194	136	281	170	78	0.58209	0.382643	0.298901	0.410819	0.508982	0.219718	UBC12	744219	TACTAAC		Schreiber et al	Kawashima et al
XVI	795030	795377	GTATG_AAAAG	+	17	u3	159	151	53	78	45	94	0.0018083	0.00164872	0.000923297	0.000970053	0.000554679	0.00122624	RPS23B	0	non	Gould et al	Schreiber et al	Kawashima et al
VIII	505244	505516	GTATG_GAAAG	-	4	d3	162	156	71	64	120	84	0.00244329	0.00244798	0.00186156	0.0011837	0.00216998	0.00165445	RPS4B	0	non	Gould et al	Schreiber et al
XII	263277	263594	GTACG_TATAG	+	71	d5	172	211	241	172	117	113	0.00217973	0.00265559	0.00542109	0.00301717	0.00154594	0.00174809	RPL22A	263540	TACTAAC		Schreiber et al
IX	317018	317171	GTATG_AACAG	+	246	d5	175	171	37	156	18	50	0.00199578	0.00209549	0.000772846	0.00246882	0.000219694	0.000763639	RPL2B	317136	TACTAAC	Gould et al	Schreiber et al
II	170621	170804	GTATG_CTCAG	+	56	u5	176	120	90	108	65	61	0.0616031	0.0367309	0.0285442	0.0210321	0.0159041	0.0147094	LSM2	170731	AACTAAC	Gould et al	Schreiber et al
XVI	406726	407067	GTATG_AACAG	+	79	d5	181	170	3	22	82	20	0.00354104	0.00348897	9.89e-05	0.000496569	0.00181211	0.000479927	RPL21B	407002	TACTAAC		Schreiber et al
I	150990	151096	GTATG_ATCAG	-	17	d3	192	123	289	264	151	190	0.421053	0.18894	0.593429	0.413793	0.431429	0.603175	TFC3	151022	TACTAAC		Schreiber et al
IV	254956	255044	GTATG_AAAAG	-	19	d3	196	334	176	195	128	137	0.541436	1.14384	0.498584	0.515873	0.882759	0.709845	IWR1	254999	GACTAAC		Schreiber et al
XIII	23361	23654	GTATG_AACAG	-	4	d5	203	137	124	99	174	131	0.0272264	0.0200939	0.0240124	0.0167399	0.0336427	0.0352625	TUB3	0	non	Gould et al
III	111580	111633	GTATG_GGGAG	-	22	u3	205	214	54	181	132	160	0.367384	0.346278	0.303371	0.619863	0.342857	0.461095	YCL002C	111588	GACTAAC		Schreiber et al
IV	1359970	1360373	GTATG_ATAAG	+	31	u3	207	195	133	126	150	210	0.00347222	0.00303511	0.00331828	0.00215528	0.00280358	0.00384278	RPS18A	0	non	Gould et al	Schreiber et al	Kawashima et al
VI	64600	64856	GTTTG_AACAG	-	64	d5	214	245	246	641	532	409	0.133666	0.189775	0.116809	0.254063	0.186275	0.164257	RPL22B	64615	TACTAAC		Schreiber et al
XVI	138726	138868	GTATG_GTCAG	+	4	d3	219	177	196	100	173	118	0.0161362	0.0134162	0.0154246	0.00600132	0.0123766	0.010303	SAR1	0	non	Gould et al		Kawashima et al
II	170677	170757	GTATG_AAAAG	+	47	u3	230	517	281	472	220	207	0.080504	0.158249	0.0891215	0.0919182	0.0538292	0.0499156	LSM2	170731	AACTAAC	Gould et al	Schreiber et al	Kawashima et al
XI	155272	155636	GTATG_CGAAG	+	18	u3	231	309	188	429	220	178	0.414722	0.478328	0.417778	0.78	0.510441	0.468421	APE2	0	non	Gould et al	Schreiber et al	Kawashima et al
XVI	218647	218721	GTATG_TAAAG	+	25	u3	267	148	99	104	169	145	1.04706	0.358354	1.41429	0.485981	0.725322	1.19835	SPT14	218695	GAAGATC		Schreiber et al	Kawashima et al
XII	522891	523028	GTATG_AATAG	+	221	d5	269	180	42	7	13	7	0.00597181	0.00446573	0.00136652	0.000190001	0.000310968	0.000177188	RPL37A	522984	TACTAAC	Gould et al
XII	263328	263594	GTACG_TATAG	+	122	d5	297	341	275	480	275	304	0.00376383	0.00429174	0.00618589	0.00842002	0.00363363	0.00470282	RPL22A	263540	TACTAAC
IV	1355232	1355550	GTACG_GGTAG	-	5	d3	312	294	241	76	258	169	0.00916515	0.00765107	0.011054	0.00274002	0.00904184	0.00700663	RPS17B	0	non
IX	99131	99385	GTACG_ATGAG	-	35	u3	427	481	251	244	497	263	0.00968298	0.0116946	0.00962054	0.00730255	0.0132311	0.00791573	RPL16A	0	non		Schreiber et al
XIII	424998	425124	GTATG_ACAAG	+	29	u3	553	629	355	462	423	415	0.0816477	0.114239	0.0747526	0.0812379	0.0823919	0.0808022	SEC14	425094	TATCAAT	Gould et al	Schreiber et al	Kawashima et al
VII	439098	439323	GTATA_AACAG	+	4	d5	608	418	341	569	651	473	0.00433376	0.00326578	0.00439716	0.00556964	0.00454032	0.00432441	RPL30	0	non	Gould et al	Schreiber et al
VII	555831	556109	GTATG_TTTAG	+	198	u3	613	755	314	348	70	118	0.00544729	0.0069086	0.00487464	0.00411659	0.000722417	0.00130462	RPL26B	555885	CACGAAA	Gould et al		Kawashima et al
V	269784	270148	GTATG_GAAAG	-	32	u3	1292	1104	933	980	881	769	0.0188344	0.0201567	0.0188664	0.0183662	0.0129498	0.0141762	RPL34A	269803	TACTAAC		Schreiber et al
XI	93367	93515	GTATG_TATAG	-	148	newintron	5	32	0	24	18	4	inf	inf		inf	inf	inf	no_maches	93385	AACTAAC		Schreiber et al
XII	64555	65010	GTAGA_GTAAG	+	455	newintron	5	12	12	10	2	9	inf	inf	inf	inf	inf	inf	no_maches	0	non
XIII	659668	659879	GTATA_ACAAG	+	211	newintron	5	8	9	0	3	0	0.00276396	0.00362976	0.00291262	0	0.00245499	0	CIK1	0	non
XIII	242927	243056	GTAAG_CCAAG	-	129	newintron	5	10	9	0	0	0	0.00263852	0.00508906	0.00562149	0	0	0	TAF11	242969	TACTGAC
XV	159650	160167	GTACC_TCAAG	-	517	newintron	5	5	0	0	0	15	8.02e-06	8.08e-06	0	0	0	3.04e-05	ADH1	0	non
IX	232385	232502	GTAGG_CAAAG	+	117	newintron	5	13	0	0	5	0	inf	inf			inf		no_maches	0	non
VII	186057	187215	GTATG_TTAAG	+	1158	newintron	5	12	0	18	1	1	0.00106815	0.00226415	0	0.00414747	0.000280191	0.000309215	SUA5	0	non
VIII	372188	372292	GTTTG_GATAG	+	104	newintron	6	20	9	17	30	13	0.00102354	0.00363967	0.00177165	0.00257967	0.00555864	0.00253708	WSS1	372284	TACTAAC
X	432365	432470	GTATA_TATAG	-	105	newintron	6	10	0	7	20	0	inf	inf		inf	inf		no_maches	0	non
XII	233577	234002	GTGAC_GCCAG	-	425	newintron	6	5	4	11	7	3	5.05e-06	4.33e-06	4.02e-06	7.8e-06	5.56e-06	2.54e-06	PDC1	0	non
XII	233714	233992	GTGAA_ACAAG	+	278	newintron	6	7	1	15	8	13	inf	inf	inf	inf	inf	inf	no_maches	0	non
XIV	282745	282864	GTTTT_TGGAG	-	119	newintron	6	6	5	10	5	5	inf	inf	inf	inf	inf	inf	no_maches	0	non
XVI	75715	75903	GCAGC_TGGAG	+	188	newintron	6	6	2	3	5	1	0.6	0.315789	0.133333	0.5	0.108696	0.0625	YPL250W-A	0	non
VIII	127197	127237	GTCAC_TGAAG	+	40	newintron_introncontaining	6	13	0	0	0	10	4.51e-05	9.24e-05	0	0	0	7.9e-05	RPL27A	0	non
XII	233958	234002	GTGAC_TGAAG	-	44	newintron	6	9	0	0	0	4	5.05e-06	7.79e-06	0	0	0	3.38e-06	PDC1	0	non
IV	205461	205670	GTGAA_AGAAG	+	209	newintron	6	5	2	6	1	1	inf	inf	inf	inf	inf	inf	no_maches	0	non
IV	601032	601139	GTACC_TAGAG	-	107	newintron	6	6	11	2	5	1	inf	inf	inf	inf	inf	inf	no_maches	0	non	Gould et al
VII	97441	97537	GCTGC_TCAAG	+	96	newintron	6	10	4	2	1	0	0.00293974	0.00564016	0.00285307	0.00106326	0.000646412	0	SIP2	0	non
VII	148599	148767	GTATG_ATTAG	-	168	newintron	6	11	28	11	1	34	inf	inf	inf	inf	inf	inf	no_maches	0	non
VIII	526946	527215	GTTAC_CTGAG	+	269	newintron	7	17	10	8	5	6	0.00094569	0.00214403	0.00139645	0.000793808	0.000666223	0.000814332	FLO5	0	non
X	367031	367315	GTTTA_GGCAG	-	284	newintron	7	21	12	19	7	14	inf	inf	inf	inf	inf	inf	no_maches	0	non
X	702191	702442	GTAAG_TTTAG	-	251	newintron_introncontaining	7	26	0	8	10	22	3.47e-05	0.00013296	0	4.26e-05	4.9e-05	0.000118584	RPS4A	0	non
XII	64399	64854	GTTGA_CAGAG	-	455	newintron	7	5	6	5	2	8	0.000232527	0.000160241	0.000194729	0.000115314	0.000118596	0.000496124	UBI4	0	non
IV	427389	427430	GTGGT_TAGAG	+	41	newintron	7	5	10	5	0	14	0.000219291	0.000155015	0.000566412	0.000182409	0	0.000507246	NOP1	0	non
VII	148599	148711	GTAAA_ATTAG	-	112	newintron	7	16	0	9	0	4	inf	inf		inf		inf	no_maches	0	non
X	702119	702140	GTCTT_ACAAG	-	21	newintron_introncontaining	7	6	3	15	0	0	3.47e-05	3.07e-05	2.16e-05	8e-05	0	0	RPS4A	0	non
IV	122078	122167	GTATG_CTAAG	+	89	newintron	7	35	60	25	18	64	inf	inf	inf	inf	inf	inf	no_maches	122160	TACTAAC	Gould et al	Schreiber et al
XVI	335480	335751	GTATG_GACAG	-	271	newintron	7	10	0	23	0	7	0.000902876	0.00104015	0	0.00220138	0	0.000844798	BEM3	0	non
IV	655204	655272	GTATG_ATCAG	+	68	newintron	7	12	25	14	2	15	0.00127065	0.00237154	0.00586304	0.0024403	0.000523834	0.00406064	TVP15	655244	TACTAAG	Gould et al
IV	871120	871149	GTTAT_ACAAG	+	29	newintron	7	12	8	8	8	6	0.000432259	0.000707047	0.000703297	0.000462401	0.000545628	0.000438372	YDR210W	0	non
IX	23552	23764	GTGAC_CAGAG	+	212	newintron	7	6	4	18	1	2	inf	inf	inf	inf	inf	inf	no_maches	0	non
VII	883037	883462	GTTGT_AGAAG	-	425	newintron	7	5	2	6	6	4	4e-06	3e-06	1.56e-06	3.45e-06	3.87e-06	2.89e-06	TDH3	0	non
XII	64421	64648	GTATT_AGAAG	-	227	newintron	8	7	24	14	5	8	0.000265745	0.000224337	0.000778917	0.000322878	0.00029649	0.000496124	UBI4	0	non
XII	789156	789176	GTTTG_CACAG	-	20	newintron	8	5	7	8	1	3	inf	inf	inf	inf	inf	inf	no_maches	0	non
XII	982459	982538	GTATG_AGTAG	-	79	newintron	8	20	8	0	14	32	inf	inf	inf		inf	inf	no_maches	982470	GACTAAC	Gould et al
I	12536	12823	GTGGT_AATAG	+	287	newintron	8	6	19	11	0	9	inf	inf	inf	inf		inf	no_maches	0	non
XII	848797	849095	GTACC_TAAAG	-	298	newintron	8	10	20	0	0	0	0.00149645	0.0017322	0.00468384	0	0	0	DCR2	0	non
XV	467399	467489	GTACG_ACTAG	-	90	newintron	8	15	27	0	0	0	0.00247678	0.00398936	0.00692841	0	0	0	CDC21	0	non
IV	216158	216512	GTATG_TTAAG	+	354	newintron	8	18	25	11	32	10	inf	inf	inf	inf	inf	inf	no_maches	0	non	Gould et al
IV	216158	216521	GTATG_CATAG	+	363	newintron	8	6	15	7	10	0	inf	inf	inf	inf	inf		no_maches	0	non	Gould et al
VII	186057	187208	GTATG_TGCAG	+	1151	newintron	8	29	0	15	22	8	0.00170904	0.0054717	0	0.00345622	0.00616419	0.00247372	SUA5	0	non
I	206383	206517	GTCTA_TGAAG	+	134	newintron	8	38	14	22	48	2	0.00369174	0.0147802	0.0187166	0.0189003	0.0449018	0.00220022	FLO1	0	non
X	120850	121179	GTAGT_CAGAG	-	329	newintron	9	9	3	11	9	12	inf	inf	inf	inf	inf	inf	no_maches	0	non
XII	1072192	1072397	GTACG_CTTAG	+	205	newintron	9	13	1	38	5	6	inf	inf	inf	inf	inf	inf	no_maches	0	non		Schreiber et al
XV	943806	943896	GTAAG_GATAG	+	90	newintron	9	39	13	2	10	11	0.00020578	0.000952381	0.000352141	4.25e-05	0.000278987	0.000348775	VMA4	0	non
I	128522	129034	GTAAG_AGCAG	-	512	newintron	9	8	0	0	0	0	0.00167535	0.00153315	0	0	0	0	SYN8	0	non
IV	216158	216491	GTATG_TAGAG	+	333	newintron	9	11	30	47	18	8	inf	inf	inf	inf	inf	inf	no_maches	0	non
IV	417222	417626	GTATG_TATAG	-	404	newintron	9	9	34	20	39	69	0.000742084	0.000721906	0.00255466	0.00114077	0.00427772	0.00768118	OSH2	0	non	Gould et al
I	139559	139606	GTGGT_CCCAG	-	47	newintron	9	6	7	9	11	7	3.34e-05	2.22e-05	2.74e-05	2.52e-05	3.47e-05	2.44e-05	SSA1	0	non
VII	148599	148716	GTTAC_ATTAG	-	117	newintron	9	12	10	26	27	30	inf	inf	inf	inf	inf	inf	no_maches	0	non
XII	64649	65104	GTATC_GGAAG	-	455	newintron	10	23	9	25	7	5	0.000332182	0.000737109	0.000292094	0.000576568	0.000415085	0.000310078	UBI4	0	non
II	168870	169052	GTTTG_GAAAG	+	182	newintron_introncontaining	10	9	0	10	6	7	6.26e-05	5.91e-05	0	6.67e-05	3.66e-05	4.67e-05	RPL19B	0	non
XII	95622	95660	GTGGT_CCCAG	-	38	newintron	10	5	6	7	10	3	1.86e-05	9.22e-06	1.51e-05	1.23e-05	1.73e-05	5.66e-06	SSA2	0	non
XII	96162	96695	GTGAA_TGAAG	-	533	newintron	10	22	5	6	5	12	1.86e-05	4.06e-05	1.26e-05	1.06e-05	8.63e-06	2.26e-05	SSA2	0	non
XII	233735	233879	GTGTG_ACAAG	+	144	newintron	10	27	15	23	61	48	inf	inf	inf	inf	inf	inf	no_maches	0	non
XII	898549	898645	GTATA_TGCAG	+	96	newintron	10	23	15	17	15	5	inf	inf	inf	inf	inf	inf	no_maches	0	non	Gould et al
XII	1065659	1065845	GTACG_CTTAG	+	186	newintron	10	13	10	39	4	6	inf	inf	inf	inf	inf	inf	no_maches	0	non		Schreiber et al
XIII	147124	147210	GTTAA_AGAAG	+	86	newintron	10	26	7	22	14	24	4.36e-05	0.000110626	4.28e-05	9.8e-05	6.23e-05	0.000108072	RPS1B	0	non
XIV	302990	303388	GTTCA_CATAG	-	398	newintron	10	10	0	0	1	8	inf	inf			inf	inf	no_maches	0	non
IV	306806	307073	GTACG_TTTAG	-	267	newintron_introncontaining	10	19	40	26	0	6	8.89e-05	0.000171048	0.000556104	0.000275929	0	5.77e-05	RPS16B	0	non	Gould et al	Schreiber et al
V	401613	401690	GTGGG_CACAG	-	77	newintron	10	12	0	0	0	5	inf	inf				inf	no_maches	0	non
V	540372	540441	GTATG_ATAAG	-	69	newintron	10	8	17	0	0	2	inf	inf	inf			inf	no_maches	540383	TCCTAAC
VII	699231	699769	GTATG_TGAAG	-	538	newintron	10	5	4	0	0	0	0.000449721	0.000228592	0.000265781	0	0	0	VOA1	0	non
VIII	217286	217449	GTATG_AGCAG	+	163	newintron	10	5	3	7	0	0	0.12987	0.0909091	0.0625	0.179487	0	0	YHR056W-A	0	non
XI	223741	223801	GTAAT_AGGAG	-	60	newintron	10	14	0	0	0	0	0.0047259	0.00505598	0	0	0	0	APN1	0	non
XVI	64132	64164	GTTTA_ATCAG	+	32	newintron	10	28	0	5	0	9	inf	inf		inf		inf	no_maches	0	non
I	23516	23635	GTATG_TCTAG	-	119	newintron	11	17	0	0	0	0	inf	inf					no_maches	0	non
XII	233643	234062	GTAAA_CCCAG	-	419	newintron	11	8	0	1	0	0	9.25e-06	6.93e-06	0	7.09e-07	0	0	PDC1	0	non
IV	916823	916947	GTCTT_CAAAG	-	124	newintron	11	7	0	0	8	1	inf	inf			inf	inf	no_maches	0	non
I	140108	140641	GTGAA_TGAAG	-	533	newintron	11	6	4	15	2	6	4.08e-05	2.22e-05	1.57e-05	4.19e-05	6.32e-06	2.09e-05	SSA1	0	non
VII	148599	148897	GTAAT_ATTAG	-	298	newintron	11	9	4	15	15	5	0.00848111	0.00595238	0.0040201	0.0109091	0.009113	0.00355619	YGL188C-A	0	non
VII	787800	788178	GTATG_CACAG	-	378	newintron	11	44	0	2	8	13	inf	inf		inf	inf	inf	no_maches	0	non		Schreiber et al
XI	220778	220831	GTGCT_GGGAG	+	53	newintron	12	17	14	15	12	21	0.000558971	0.000721746	0.000650225	0.000515482	0.000538117	0.00100666	SBA1	0	non	Gould et al	Schreiber et al
XV	791685	792015	GTAAG_GCAAG	-	330	newintron	12	40	16	31	5	8	0.00123419	0.00328084	0.00178611	0.00251012	0.000547885	0.000937427	PUS7	0	non
XVI	739739	739796	GTAAG_TTTAG	-	57	newintron	12	11	0	1	2	0	0.00214248	0.00156383	0	0.000101719	0.000352051	0	COG4	0	non
XVI	869029	869184	GTTGA_AAGAG	-	155	newintron	12	13	11	13	15	7	0.000334262	0.000378435	0.000378762	0.000335354	0.000428461	0.000216651	TIF3	0	non
II	681015	681274	GTTTG_TGGAG	-	259	newintron	12	42	13	28	1	9	inf	inf	inf	inf	inf	inf	no_maches	0	non
I	25891	26160	GTAAA_TAGAG	+	269	newintron	12	8	9	5	0	3	inf	inf	inf	inf		inf	no_maches	0	non
II	691967	692130	GTATG_GTAAG	+	163	newintron	12	8	0	23	6	0	0.00152149	0.000825168	0	0.00195962	0.000939408	0	PRP5	0	non
V	110545	110820	GTATG_GATAG	-	275	newintron	12	45	24	44	0	20	0.00616016	0.0169555	0.00758773	0.0102183	0	0.0084317	YEL023C	0	non
X	702219	702395	GTTAC_ACAAG	-	176	newintron_introncontaining	12	10	0	0	0	7	5.95e-05	5.11e-05	0	0	0	3.77e-05	RPS4A	0	non
IX	23444	23764	GTGAC_CAGAG	+	320	newintron	12	16	20	49	10	14	inf	inf	inf	inf	inf	inf	no_maches	0	non	Gould et al
VII	667572	667796	GTATG_AGAAG	+	224	newintron	12	5	0	7	6	0	0.00718993	0.00268096	0	0.0029838	0.003	0	PRP31	0	non
I	206113	206247	GTCTA_TGAAG	+	134	newintron	12	5	0	1	0	1	0.00553761	0.00194477	0	0.000859107	0	0.00110011	FLO1	0	non
XVI	303550	303930	GTCTT_CCAAG	+	380	newintron	13	5	1	8	16	13	5.11e-05	2.1e-05	6.31e-06	3.92e-05	6.83e-05	6.49e-05	RPL5	0	non
XIII	911566	911640	GTACT_GGCAG	-	74	newintron	13	13	0	0	0	0	0.000346879	0.000380195	0	0	0	0	ADH6	0	non
XIV	174508	174593	GTCAG_TCAAG	-	85	newintron	13	7	0	0	0	0	0.00132168	0.000759961	0	0	0	0	NRD1	0	non
XVI	720145	720616	GTATG_TACAG	-	471	newintron	13	5	0	0	0	1	0.0195489	0.0100402	0	0	0	0.0015949	ASR1	0	non
XII	28463	28834	GTATG_TTAAG	-	371	newintron	14	20	28	17	18	0	inf	inf	inf	inf	inf		no_maches	0	non	Gould et al
XIII	134620	134763	GTGAT_CATAG	-	143	newintron	14	7	0	0	1	0	inf	inf			inf		no_maches	0	non
II	680935	680967	GTTCT_GGAAG	-	32	newintron	14	19	10	64	0	1	inf	inf	inf	inf		inf	no_maches	0	non
XII	278845	279329	GTACG_TCCAG	+	484	newintron	14	21	0	0	0	0	0.00438597	0.00552777	0	0	0	0	YLR072W	0	non
I	139559	139582	GTGGT_CCCAG	-	23	newintron	14	6	15	6	6	13	5.19e-05	2.22e-05	5.87e-05	1.68e-05	1.9e-05	4.53e-05	SSA1	0	non
VII	482847	483129	GTTGA_CAGAG	+	282	newintron	14	12	12	16	7	21	0.0334129	0.0262582	0.130435	0.0993789	0.0648148	0.283784	BRP1	0	non
XII	64776	65003	GTGAA_ACAAG	+	227	newintron	15	10	9	9	5	10	inf	inf	inf	inf	inf	inf	no_maches	0	non
VI	123405	123550	GTATT_TGAAG	+	145	newintron	15	34	38	21	0	0	0.000552792	0.00105289	0.00152451	0.000592969	0	0	BLM10	0	non
VII	186057	187220	GTATG_AAAAG	+	1163	newintron	15	9	19	5	0	0	0.00320444	0.00169811	0.00552326	0.00115207	0	0	SUA5	0	non
VII	519212	519313	GTACT_ATAAG	-	101	newintron	15	6	10	14	0	12	inf	inf	inf	inf		inf	no_maches	0	non
X	570568	570640	GTAGT_CCAAG	-	72	newintron	16	34	2	11	29	7	0.00100756	0.00234337	0.000207879	0.000898766	0.00213455	0.000577796	LIA1	0	non	Gould et al
XII	64476	64703	GTTGA_TAGAG	-	227	newintron	16	29	16	19	11	5	0.000531491	0.000929398	0.000519278	0.000438192	0.000652277	0.000310078	UBI4	0	non
IV	427467	427574	GTGGC_CAGAG	+	107	newintron	16	14	13	9	12	17	0.000501237	0.000434041	0.000736335	0.000328335	0.000397022	0.000615942	NOP1	0	non	Gould et al
IX	232385	232507	GTAGG_AGCAG	+	122	newintron	16	46	0	3	2	0	inf	inf		inf	inf		no_maches	0	non
X	120850	121236	GTGGT_CAGAG	-	386	newintron	17	25	23	29	11	26	inf	inf	inf	inf	inf	inf	no_maches	0	non
XIII	443439	444675	GTATG_AATAG	+	1236	newintron	17	37	7	0	12	0	inf	inf	inf		inf		no_maches	0	non
XV	349498	349598	GTATG_TTTAG	-	100	newintron	17	39	0	1	23	12	inf	inf		inf	inf	inf	no_maches	349520	TACTAAG	Gould et al
XV	444957	445496	GTTAC_AAGAG	+	539	newintron	17	28	0	9	14	19	4.19e-05	6.9e-05	0	2.42e-05	3.52e-05	5.13e-05	RPL3	0	non
XV	754861	755098	GTATG_AATAG	+	237	newintron	17	18	0	0	14	4	inf	inf			inf	inf	no_maches	0	non
XVI	673749	674376	GTATG_AAAAG	+	627	newintron	17	12	4	24	12	0	0.00232941	0.00179506	0.000761905	0.00334029	0.00208514	0	YMC1	0	non	Gould et al
VII	364992	365434	GTAAA_TACAG	+	442	newintron	17	20	0	21	2	12	inf	inf		inf	inf	inf	no_maches	0	non
III	83597	84119	GTACG_ACTAG	+	522	newintron	18	7	5	0	0	1	0.0187891	0.00683594	0.00367107	0	0	0.000777001	YCL021W-A	0	non
VII	878161	878395	GTATG_CTCAG	-	234	newintron	18	12	0	2	0	6	0.000649632	0.000470478	0	9.72e-05	0	0.000349875	CRH1	0	non
XV	993517	994161	GTATG_TATAG	-	644	newintron	18	9	0	0	0	0	0.00460476	0.00180542	0	0	0	0	MNE1	0	non
VIII	526676	526810	GTTAC_CTGAG	+	134	newintron	19	14	16	34	13	20	0.00256687	0.00176567	0.00223433	0.00337368	0.00173218	0.00271444	FLO5	0	non
XI	142218	142460	GTAGT_CTGAG	+	242	newintron	19	20	15	27	17	20	inf	inf	inf	inf	inf	inf	no_maches	0	non
XII	64783	65010	GTAGA_GTAAG	+	227	newintron	19	23	15	18	5	5	inf	inf	inf	inf	inf	inf	no_maches	0	non
XIV	254887	254934	GTGGC_GCCAG	+	47	newintron	19	24	17	33	18	11	0.00105176	0.00149729	0.00113024	0.00172495	0.00119324	0.000960447	YNL208W	0	non
XIV	282625	282744	GTCTT_TGGAG	-	119	newintron	19	25	49	34	47	37	inf	inf	inf	inf	inf	inf	no_maches	0	non	Gould et al
V	93661	93839	GTATG_TCAAG	+	178	newintron	19	9	0	0	0	0	0.00043171	0.00020164	0	0	0	0	SPF1	0	non
III	108111	108593	GTATG_TTCAG	+	482	newintron	19	7	18	12	22	4	0.00903471	0.0030541	0.0103806	0.00572246	0.0115183	0.00289436	LDB16	0	non
XII	982404	982538	GTATG_AAAAG	-	134	newintron	19	40	8	0	0	11	inf	inf	inf			inf	no_maches	982470	GACTAAC
XII	64193	64420	GTATC_GGAAG	-	227	newintron	20	20	17	23	4	8	0.000664364	0.000640964	0.000551733	0.000530443	0.000237192	0.000496124	UBI4	0	non
II	691967	692156	GTATG_GAAAG	+	189	newintron	20	16	18	13	2	10	0.00253582	0.00165033	0.00216372	0.00110761	0.000313136	0.00159413	PRP5	0	non
V	110553	110820	GTATG_ATTAG	-	267	newintron	20	74	62	45	23	57	0.0102669	0.0278824	0.0196016	0.0104505	0.0110418	0.0240304	YEL023C	0	non
XII	64132	64359	GTTCT_ACAAG	+	227	newintron	21	17	17	19	7	10	inf	inf	inf	inf	inf	inf	no_maches	0	non		Schreiber et al
XIII	443439	443821	GTATG_AATAG	+	382	newintron	21	24	31	40	0	0	inf	inf	inf	inf			no_maches	0	non
IV	451412	451490	GTATG_TGTAG	-	78	newintron	21	26	0	44	1	21	0.00108887	0.00136806	0	0.00177091	7.13e-05	0.00156495	NTH1	451430	TGCTAAC	Gould et al
IV	1145112	1145176	GTACG_GCTAG	+	64	newintron	21	37	19	34	20	19	0.010209	0.016115	0.00680516	0.00789779	0.00702988	0.00676397	YDR336W	1145148	TGCTAAC
XII	64932	65159	GTTGA_TAGAG	-	227	newintron	22	18	13	16	4	3	0.0007308	0.000576868	0.000421914	0.000369004	0.000237192	0.000186047	UBI4	0	non
XII	93899	94286	GTATG_CCTAG	+	387	newintron	22	30	0	10	0	16	inf	inf		inf		inf	no_maches	0	non
IV	122078	122186	GTATG_TCAAG	+	108	newintron	22	26	49	33	23	3	inf	inf	inf	inf	inf	inf	no_maches	122160	TACTAAC	Gould et al	Schreiber et al
XI	519697	519774	GTAGC_CCGAG	-	77	newintron	23	12	49	19	9	13	inf	inf	inf	inf	inf	inf	no_maches	0	non
XVI	602268	602341	GTATG_GACAG	-	73	newintron	23	9	25	76	7	15	0.00493245	0.00141889	0.00351173	0.00753968	0.00131381	0.00278603	AGC1	602284	TACTAAA
VIII	148755	148821	GTATG_ATTAG	-	66	newintron	23	35	2	2	0	9	inf	inf	inf	inf		inf	no_maches	148770	CATTAAC
IV	205806	205826	GTGAA_TGTAG	+	20	newintron	23	5	8	27	3	1	inf	inf	inf	inf	inf	inf	no_maches	0	non
VI	3957	4167	GTGCG_CTTAG	-	210	newintron	23	28	25	42	15	22	inf	inf	inf	inf	inf	inf	no_maches	0	non		Schreiber et al
XV	624768	626320	GTAAG_GAAAG	+	1552	newintron	24	23	0	5	31	0	0.00850461	0.00694025	0	0.00128866	0.00899594	0	SLP1	0	non
XVI	564489	564569	GTAAC_TGCAG	-	80	newintron	24	7	1	0	0	0	0.00226608	0.00073107	0.000135814	0	0	0	AIM45	0	non
VIII	127148	127264	GTTGT_AGAAG	+	116	newintron_introncontaining	25	39	1	56	44	91	0.000187857	0.000277333	1.1e-05	0.000476507	0.000330422	0.000719339	RPL27A	0	non
XVI	582562	582703	GTTTT_TACAG	+	141	newintron	25	24	23	1	3	10	inf	inf	inf	inf	inf	inf	no_maches	0	non
XIV	426291	426405	GTATG_TACAG	+	114	newintron	25	36	2	10	0	14	inf	inf	inf	inf		inf	no_maches	0	non
IV	601074	601139	GTACC_TAGAG	-	65	newintron	25	17	65	16	35	20	inf	inf	inf	inf	inf	inf	no_maches	0	non	Gould et al
VIII	315792	315860	GTGTA_TACAG	+	68	newintron	26	10	3	0	10	8	inf	inf	inf		inf	inf	no_maches	0	non
X	366966	367250	GTTTC_TGGAG	-	284	newintron	26	38	32	41	15	23	inf	inf	inf	inf	inf	inf	no_maches	0	non
X	702438	702500	GTCAA_GTAAG	-	62	newintron_introncontaining	26	18	0	0	15	2	0.000128858	9.2e-05	0	0	7.34e-05	1.08e-05	RPS4A	0	non
XI	166447	166516	GTACT_TATAG	+	69	newintron	27	30	35	49	66	37	inf	inf	inf	inf	inf	inf	no_maches	166479	TACTAAC
X	120850	121122	GTAGT_CAGAG	-	272	newintron	28	36	25	34	44	36	inf	inf	inf	inf	inf	inf	no_maches	0	non
XV	373900	374122	GTAAG_ATAAG	+	222	newintron	29	19	38	12	10	4	inf	inf	inf	inf	inf	inf	no_maches	0	non	Gould et al
XVI	869157	869234	GTTCC_AAGAG	-	77	newintron	31	33	26	26	47	25	0.00086351	0.000960643	0.000895255	0.000670708	0.00134251	0.000773754	TIF3	0	non
X	71427	71515	GTTGG_TTCAG	+	88	newintron	32	6	10	24	46	0	0.0181818	0.00306905	0.00558659	0.0116732	0.0219885	0	YJL193W	0	non
XII	64301	64528	GTGGT_GAGAG	-	227	newintron	32	25	24	47	12	15	0.00106298	0.000801205	0.000778917	0.00108395	0.000711575	0.000930233	UBI4	0	non
I	87386	87446	GTAGA_TACAG	-	60	newintron	32	10	0	0	12	8	0.00557491	0.00199203	0	0	0.00239521	0.0017494	SNC1	0	non
VIII	103618	103856	GTAAG_TTGAG	-	238	newintron	32	31	29	32	3	16	0.00587048	0.00593301	0.0078125	0.00650406	0.000890208	0.00505689	HSE1	0	non	Gould et al	Schreiber et al
XII	64248	64475	GTTGA_TAGAG	-	227	newintron	33	44	38	42	15	26	0.0010962	0.00141012	0.00123329	0.000968635	0.000889469	0.0016124	UBI4	0	non
XI	93312	93465	GTACG_AACAG	-	153	5UTR_intr	34	30	59	14	37	56	0.00655485	0.00646134	0.0153766	0.00308166	0.00920398	0.0144479	MTR2	93385	AACTAAC
XII	233630	233885	GTATG_GACAG	-	255	newintron	34	16	15	34	55	12	2.86e-05	1.39e-05	1.51e-05	2.41e-05	4.37e-05	1.01e-05	PDC1	0	non
IV	427413	427520	GTGGC_CAGAG	+	107	newintron	34	31	13	60	36	21	0.00106513	0.000961091	0.000736335	0.0021889	0.00119107	0.00076087	NOP1	0	non
II	306820	306902	GTATC_CGAAG	-	82	newintron	35	27	55	79	64	78	0.00394144	0.00329831	0.00737463	0.00797014	0.0083682	0.011056	PDX3	0	non
XIV	282745	282804	GTCTT_TGGAG	-	59	newintron	35	21	46	42	52	45	0.00220431	0.00149074	0.00191747	0.00144519	0.00204942	0.00186413	YNL190W	0	non	Gould et al	Schreiber et al
I	139571	139594	GTGGC_TCCAG	-	23	newintron	35	41	35	40	41	50	0.000129824	0.000151672	0.000137004	0.000111866	0.000129521	0.000174283	SSA1	0	non
XI	94060	94149	GTATG_AACAG	-	89	newintron	36	66	45	34	20	28	inf	inf	inf	inf	inf	inf	no_maches	94082	TACTAAC
XII	4919	5123	GTACG_CTTAG	-	204	newintron	36	50	21	43	26	5	inf	inf	inf	inf	inf	inf	TEL12L	0	non		Schreiber et al
XII	10454	10658	GTACG_CTTAG	-	204	newintron	36	50	21	43	25	6	inf	inf	inf	inf	inf	inf	TEL12L	0	non		Schreiber et al
XIV	282625	282684	GTCTT_TGGAG	-	59	newantisense	36	10	34	24	26	18	0.00226729	0.000709874	0.00141726	0.000825821	0.00102471	0.00074565	YNL190W	0	non	Gould et al
XVI	445503	445576	GTGTG_CGCAG	-	73	newintron	36	38	0	45	24	45	inf	inf		inf	inf	inf	no_maches	445520	GACTAAC	Gould et al
X	702087	702227	GTTCA_GTAAG	-	140	newintron_introncontaining	37	11	25	38	5	4	0.000183374	5.63e-05	0.000179881	0.000202555	2.45e-05	2.16e-05	RPS4A	0	non
I	128525	129021	GTATG_AACAG	-	496	newintron	38	46	26	10	4	9	0.00707372	0.00881564	0.00670449	0.00226347	0.000868998	0.0026393	SYN8	0	non	Gould et al
VII	439382	439475	GTAAG_TTGAG	+	93	newintron_introncontaining	39	55	11	34	46	27	0.000192795	0.000297188	9.24e-05	0.000211862	0.000221048	0.000161217	RPL30	439462	CGCTAAC		Schreiber et al
XI	166400	166487	GTACG_AGCAG	+	87	5UTR_intr	40	36	69	151	130	49	0.00434688	0.00413603	0.00844347	0.0138202	0.015691	0.00647634	MCR1	166479	TACTAAC
II	680945	680967	GTTCT_AGGAG	-	22	newintron	40	22	7	21	36	8	2.4e-05	1.37e-05	5.76e-06	1.09e-05	2.86e-05	7.25e-06	LSR1	0	non
XIV	26746	26859	GTGCC_AGTAG	+	113	newintron	41	38	36	55	26	52	0.00229306	0.00204631	0.00191408	0.00234512	0.00117075	0.00258129	EGT2	0	non
VII	148599	148969	GTAGT_ATTAG	-	370	newintron	41	16	0	0	0	0	0.0316114	0.010582	0	0	0	0	YGL188C-A	0	non
XV	525334	526838	GTATG_TAAAG	+	1504	newintron	42	12	0	1	0	0	0.00289595	0.00075221	0	6.67e-05	0	0	INP53	0	non
IV	427413	427466	GTGGC_CAGAG	+	53	newintron	42	39	22	75	50	39	0.00131575	0.00120911	0.00124611	0.00273613	0.00165426	0.00141304	NOP1	0	non
I	205751	206155	GTGAA_TAGAG	-	404	newantisense	42	86	15	96	89	55	0.0193816	0.03345	0.0200535	0.0824742	0.0832554	0.0605061	FLO1	0	non
IV	381053	381146	GTATC_TATAG	-	93	newintron	45	5	15	5	0	2	inf	inf	inf	inf		inf	0T1	381065	CACTAAC
IV	380887	381440	GTATG_CTCAG	-	553	newintron	45	33	50	19	5	7	inf	inf	inf	inf	inf	inf	0T1	381065	CACTAAC
XI	166400	166516	GTACG_TATAG	+	116	5UTR_intr	46	16	34	30	22	71	0.00499891	0.00183823	0.00416055	0.00274574	0.0026554	0.00938409	MCR1	166479	TACTAAC		Schreiber et al
XII	609403	609496	GTATG_TTCAG	-	93	newintron	47	78	24	36	0	0	0.0137749	0.020339	0.00889218	0.00813375	0	0	EST1	609448	ATCTAAC
I	206113	206382	GTCTA_TGAAG	+	269	newintron	48	64	51	120	43	58	0.0221504	0.024893	0.0681818	0.103093	0.0402245	0.0638064	FLO1	0	non
IV	757479	757670	GTCTT_ACTAG	-	191	5UTR_intr	51	43	123	124	10	27	0.0064159	0.00426714	0.01119	0.00761063	0.00213402	0.00527962	NUM1	0	non
XII	244986	245149	GTACG_AATAG	-	163	newintron	52	14	16	36	7	4	0.0156815	0.0034774	0.00529977	0.00824931	0.00246653	0.00138026	YLR049C	0	non
IX	128060	128148	GTTTT_TGCAG	+	88	newintron	52	16	0	0	8	19	inf	inf			inf	inf	no_maches	0	non
IV	216158	216504	GTATG_AAAAG	+	346	newintron	53	124	97	112	81	46	inf	inf	inf	inf	inf	inf	no_maches	0	non
XVI	869107	869184	GTTGA_AAGAG	-	77	newintron	54	15	11	10	13	18	0.00150418	0.000436656	0.000378762	0.000257965	0.000371333	0.000557103	TIF3	0	non
IV	601032	601073	GTACC_TAGAG	-	41	newintron	56	32	12	20	36	55	inf	inf	inf	inf	inf	inf	no_maches	0	non
XII	233643	233885	GTATG_CCCAG	-	242	newintron	58	68	27	56	49	43	4.88e-05	5.89e-05	2.71e-05	3.97e-05	3.89e-05	3.63e-05	PDC1	0	non	Gould et al
I	12584	12679	GTGGT_AACAG	+	95	newintron	59	84	29	127	48	82	inf	inf	inf	inf	inf	inf	no_maches	0	non
XV	31113	31214	GTTGA_CGGAG	+	101	newintron	60	35	21	31	29	44	inf	inf	inf	inf	inf	inf	no_maches	0	non	Gould et al
XIV	282625	282804	GTCTT_TGGAG	-	179	newintron	63	63	111	129	118	120	inf	inf	inf	inf	inf	inf	no_maches	0	non
XV	565946	566193	GTATG_TAAAG	-	247	newintron	69	85	16	37	0	0	0.00626134	0.00715368	0.00294442	0.00410018	0	0	ADE2	0	non
I	128522	129021	GTATG_AGCAG	-	499	newintron	71	118	28	33	23	21	0.0132167	0.022614	0.00722022	0.00746944	0.00499674	0.00615836	SYN8	0	non	Gould et al
X	632987	633060	GTATG_ATTAG	-	73	newintron	73	48	6	48	90	45	0.00287481	0.00187091	0.000225921	0.00127253	0.00199314	0.00101491	CPA2	632997	AACTAAC
IV	427467	427520	GTGGC_CAGAG	+	53	newintron	79	87	37	55	62	61	0.00247486	0.00269726	0.00209572	0.00200649	0.00205128	0.00221015	NOP1	0	non
XII	64193	64648	GTATT_GGAAG	-	455	newintron	81	62	58	99	17	34	0.00269067	0.00198699	0.00188238	0.00228321	0.00100807	0.00210853	UBI4	0	non
XVI	243490	244025	GTATG_AGAAG	-	535	newintron	81	50	61	93	35	27	0.0230375	0.0128074	0.0196901	0.0221271	0.0107001	0.00833076	YPL162C	0	non	Gould et al
X	702438	702587	GTTAG_GTAAG	-	149	newintron_introncontaining	84	52	6	32	145	29	0.000416309	0.000265919	4.32e-05	0.000170573	0.000709841	0.000156315	RPS4A	0	non
V	517852	517929	GTATG_CATAG	+	77	newintron	85	84	38	65	34	0	inf	inf	inf	inf	inf		no_maches	517902	TACTAAC
XV	791676	792015	GTAAG_AATAG	-	339	newintron	98	53	25	53	6	21	0.0100792	0.00434711	0.0027908	0.0042915	0.000657462	0.00246074	PUS7	0	non
IV	216162	216491	GTAAC_TAGAG	+	329	5UTR_intr	99	83	31	34	21	37	0.00358956	0.00308264	0.00135424	0.00113557	0.00107318	0.00202895	ARF2	0	non
XV	791693	792015	GTAAG_TTAAG	-	322	newintron	104	91	143	89	1	13	0.0106963	0.00746391	0.0159634	0.00720648	0.000109577	0.00152332	PUS7	0	non
I	12680	12727	GTGGT_AACAG	+	47	newintron	107	123	53	112	36	66	inf	inf	inf	inf	inf	inf	no_maches	0	non
II	443706	443833	GTATG_AATAG	-	127	newintron	109	156	269	347	223	269	0.0142149	0.0183854	0.0426713	0.0411479	0.0344561	0.041302	FES1	443735	TATTAAC		Schreiber et al
XIII	146929	147201	GTTAA_AAAAG	+	272	newintron	111	142	69	115	82	77	0.000483816	0.000604188	0.000422372	0.000512521	0.000364777	0.000346731	RPS1B	0	non
II	691967	692125	GTATG_AGAAG	+	158	newintron	119	139	227	150	156	100	0.0150881	0.0143373	0.0272869	0.0127801	0.0244246	0.0159413	PRP5	0	non	Gould et al	Schreiber et al
VII	756948	757152	GTATG_CCTAG	+	204	newintron	119	115	0	0	0	0	0.0278884	0.0257271	0	0	0	0	PEX4	0	non
XII	64877	65104	GTATC_GGAAG	-	227	newintron	123	90	69	126	38	57	0.00408584	0.00288434	0.00223939	0.0029059	0.00225332	0.00353488	UBI4	0	non
XVI	795699	795760	GTCGT_CCAAG	+	61	newintron_introncontaining	123	66	91	94	126	57	0.000834623	0.000434062	0.000929378	0.000689574	0.000927582	0.000439764	RPS23B	0	non
I	12632	12679	GTGGT_AACAG	+	47	newintron	131	113	48	113	72	87	inf	inf	inf	inf	inf	inf	no_maches	0	non
XI	93303	93465	GTACG_AACAG	-	162	5UTR_intr	140	58	113	95	106	65	0.0269906	0.0124919	0.0294501	0.0209113	0.0263682	0.0167699	MTR2	93385	AACTAAC		Schreiber et al
X	172413	172752	GTATG_TGCAG	-	339	5UTR_intr	155	73	679	638	177	94	0.00149346	0.000682511	0.0055263	0.0036781	0.0025881	0.00136558	URA2	0	non		Schreiber et al
II	5120	5335	GTACG_CTTAG	-	215	TEL02L	161	195	131	197	205	95	inf	inf	inf	inf	inf	inf	TEL02L	0	non		Schreiber et al
VII	253186	253248	GTATG_TTTAG	-	62	newintron	169	246	165	237	172	133	0.0637977	0.0880773	0.0637558	0.0779093	0.0710157	0.0541311	MRM2	253206	TACTAAT	Gould et al	Schreiber et al
IV	652781	653526	GTATG_AGAAG	+	745	newintron	216	281	223	419	379	302	inf	inf	inf	inf	inf	inf	no_maches	0	non		Schreiber et al
XIII	559783	560157	GTATG_TGAAG	+	374	3UTR_int	320	280	170	137	196	103	0.170213	0.165192	0.166341	0.108644	0.169257	0.0925427	YMR147W	559831	TACTAAC	Gould et al	Schreiber et al
XI	93367	93465	GTACG_TATAG	-	98	5UTR_intr	377	298	216	271	221	182	0.0726817	0.0641826	0.056294	0.0596522	0.0549751	0.0469556	MTR2	93385	AACTAAC	Gould et al
VII	787784	788178	GTATG_AGAAG	-	394	5UTR_intr	385	551	115	178	195	172	0.00378419	0.00521706	0.00175949	0.00207573	0.00221319	0.00228553	RPL24B	0	non		Schreiber et al
VII	439382	439479	GTAAG_GAAAG	+	97	newintron_introncontaining	1525	1641	568	952	1544	1056	0.0073	0.008	0.0046	0.005	0.007	0.006	RPL30	439462	CGCTAAC	Gould et al	Schreiber et al
XIV	501157	501502	GTATG_TTTAG	+	345	5UTR_intr	610	665	621	753	866	754	0.037645	0.0431286	0.0401396	0.0411565	0.0412676	0.0405638	SUN4	0	non
V	442122	442447	GTGGC_ATCAG	+	325	newintron	693	691	413	639	443	272	0.000101872	0.000112878	9.9e-05	9.3e-05	0.000111013	8.4e-05	SCR1	0	non
IV	122078	122176	GTATG_TCAAG	+	98	5UTR_intr	783	1026	1065	1247	812	631	0.208856	0.212819	0.220087	0.207315	0.174436	0.160356	RBS1	122160	TACTAAC
II	691967	692133	GTATG_AGCAG	+	166	newintron	968	1066	698	1251	747	738	0.104222	0.109954	0.0839043	0.106586	0.116956	0.117647	PRP5	0	non	Gould et al	Schreiber et al
X	172433	172752	GTATG_GATAG	-	319	5UTR_intr	889	958	5489	7859	2413	2234	0.0085657	0.00895679	0.0446743	0.0453075	0.0352829	0.0324544	URA2	0	non
VII	150184	150525	GTATG_AATAG	-	341	5UTR_intr	1853	1829	1152	1949	1955	1792	0.597164	0.559841	0.570297	0.640276	0.57047	0.59853	COX4	0	non
VII	534474	534781	GTATC_CATAG	-	307	5UTR_intr	1856	1598	1019	1546	1482	1306	0.0111669	0.0105364	0.0092757	0.0109334	0.0104326	0.0100899	RPS25A	0	non	Gould et al	Schreiber et al
IX	127662	128148	GTAAG_TGCAG	+	486	5UTR_intr	2017	1854	1712	2304	2236	2201	0.110412	0.102171	0.107673	0.118794	0.121317	0.13568	SIM1	0	non
XII	855878	856427	GTATG_CATAG	+	549	5UTR_intr	2921	2907	1000	1241	1994	1452	0.0760578	0.0797159	0.0484848	0.0552046	0.0624491	0.0601516	RPS22B	0	non	Gould et al	Schreiber et al
IV	652781	653523	GTATG_GACAG	+	742	5UTR_intr	6572	7592	7865	11728	8343	8212	0.258689	0.271201	0.264824	0.29029	0.302831	0.297138	BMH2	0	non
IV	216158	216489	GTATG_AATAG	+	331	5UTR_intr	10303	10109	8302	11988	7578	7073	0.373568	0.37545	0.362675	0.400387	0.387265	0.387859	ARF2	0	non
XII	855878	856434	GTATG_ATTAG	+	556	5UTR_intr	14206	13958	5677	6989	8938	7287	0.3699	0.382757	0.275248	0.310899	0.279925	0.301877	RPS22B	0	non
IV	340811	341219	GTATG_TATAG	-	408	5UTR_intr	14719	12965	4934	6157	8717	6174	0.223625	0.224568	0.113666	0.105912	0.140822	0.116254	RPS29B	0	non
V	423591	423951	GTATG_TTTAG	+	360	5UTR_intr	15211	14931	6833	9017	9410	7836	0.256289	0.257028	0.136959	0.149672	0.150116	0.143577	RPS26B	0	non
V	362733	363092	GTATG_AATAG	+	359	5UTR_intr	25192	24876	8551	12272	16661	13271	0.209904	0.208991	0.121451	0.125874	0.140121	0.128908	RPS8B	362831	TTCTAAC
XII	795913	796335	GTATG_CTCAG	-	422	5UTR_intr	26266	25433	10844	15281	17690	15683	0.414473	0.42823	0.288535	0.29351	0.322516	0.301538	RPS25B	0	non
VII	787787	788178	GTATG_TTTAG	-	391	5UTR_intr	36204	36975	13202	18249	20239	16445	0.355852	0.350092	0.201989	0.212809	0.229707	0.218521	RPL24B	0	non
VII	148599	148966	GTATG_ATTAG	-	367	5UTR_intr	36466	35601	3710	4718	6693	5508	28.1157	23.5456	3.72864	3.43127	4.06622	3.9175	YGL188C-A	0	non
II	89133	89440	GTATG_TACAG	-	307	5UTR_intr	38099	35748	13566	18320	21690	18012	0.199565	0.194623	0.113191	0.11546	0.113931	0.112806	RPS8A	0	non
XII	898158	898645	GTATG_TGCAG	+	487	5UTR_intr	39367	34532	18510	22684	25098	21775	0.539104	0.487644	0.412323	0.378881	0.441493	0.402213	RPS19A	0	non
VII	534474	534785	GTATG_CATAG	-	311	5UTR_intr	41952	39230	18670	26152	27498	26092	0.252411	0.258664	0.169948	0.184948	0.193573	0.201581	RPS25A	0	non
VII	437942	438397	GTATG_TATAG	-	455	5UTR_intr	47590	47042	17241	22750	31653	23720	0.348354	0.348374	0.181601	0.180224	0.231921	0.200162	RPL24A	0	non
XVI	281374	281503	GTATG_AACAG	-	129	ncRNA_int	54941	50784	14155	29391	23921	20316	0.280663	0.279771	0.222619	0.211496	0.229831	0.195095	SNR17B	281450	CAATAAT
VI	223441	223771	GTACG_TCCAG	-	330	5UTR_intr	68223	67402	17325	25687	29046	25653	0.653884	0.629884	0.322488	0.317912	0.350632	0.33004	RPL29	0	non
II	45645	45977	GTATG_ATTAG	+	332	5UTR_intr	162854	147692	89346	109317	137513	117226	0.602311	0.592009	0.559956	0.533589	0.562766	0.55425	RPL32	0	non
XIV	144848	145254	GTATG_ATCAG	-	302	d3	0	17	17	22	1	29	0	0.047619	0.0342742	0.0337942	0.003367	0.0705596	IST1	145191	TACTAAC	Gould et al
II	679928	680039	GTATG_GACAG	-	15	d3	0	1	11	8	5	0	0	0.000655308	0.00825826	0.00499688	0.00405186	0	OM14	679973	GACTAAC		Schreiber et al
II	110267	110505	GTAAG_AGTAG	-	154	d3	0	0	11	13	0	0	0	0	0.00590763	0.00616114	0	0	CMC2	110451	TACTAAC
II	142775	142846	GTATG_GAAAG	-	25	u3	0	0	4	10	0	22	0	0	0.00327065	0.00448431	0	0.0151307	ERD2	142787	TACTAAC
IV	1401792	1402184	GTAAA_CGTAG	+	9	u5	0	19	9	11	0	11	0	0.000994452	0.000638706	0.000545933	0	0.000537346	RPL27B	0	non
V	396884	397281	GTATA_AATAG	+	73	d5	0	0	6	6	0	0	0	0	0.000107022	7.93e-05	0	0	RPL23B	397225	TACTAAC
VIII	126552	127343	GTACG_TTTAG	+	231	d3	0	0	12	10	0	7	0	0	0.000259045	0.00016289	0	0.000106135	RPL27A	0	non		Schreiber et al
IX	231958	232353	GTACT_TATAG	-	13	d5	0	1	6	13	10	0	0	3.14e-05	0.000363262	0.000568928	0.000369727	0	RPS24B	232012	TACTAAC
XIII	732470	732875	GTTTG_AATAG	+	4	d5	1	4	4	6	11	8	1.31e-05	5.46e-05	7.28e-05	9.19e-05	0.000169298	0.000140169	RPS10B	732835	TACTAAC
XV	93662	94290	GTATG_CAAAG	-	182	d3	1	0	11	12	0	0	1.04e-05	0	0.000205757	0.000149759	0	0	RPL18A	93868	TACTAAC
XVI	412257	413012	GTATG_GATAG	+	5	u5	1	0	8	7	0	1	inf		inf	inf		inf	GCR1	412958	TACTAAC		Schreiber et al
IX	317047	317171	GTATC_AACAG	+	275	d5	2	25	17	8	0	2	2.28e-05	0.000306358	0.000355091	0.000126606	0	3.05e-05	RPL2B	317136	TACTAAC		Schreiber et al
IX	155227	155442	GTATA_GAAAG	+	87	d5d3	2	7	56	25	56	6	0.00234192	0.00807382	0.0429448	0.011956	0.0858896	0.010274	COX5B	155301	TACAAGC
VII	62132	62214	GTATG_CTTAG	+	25	d3	2	0	28	39	36	10	0.00606061	0	0.0292276	0.0315534	0.0376569	0.0117233	TAN1	62173	TACTAAC	Gould et al
XII	40233	40400	GTATG_TGAAG	-	11	u3	3	10	11	23	18	18	0.000158881	0.000533134	0.000674557	0.000960134	0.00100475	0.00111871	COF1	40353	TACTAAC
XV	240935	241025	GTAAG_TGAAG	-	13	d3	3	25	18	7	0	15	0.00952381	0.0684932	0.0573248	0.0150538	0	0.0547445	RRT8	240976	GACTAAC		Schreiber et al
XVI	76155	76223	GTATG_AACAG	-	169	u3	3	7	9	7	0	0	3.3e-05	8.51e-05	0.0001671	0.000103908	0	0	RPL36B	76164	CACTAAG
XI	109578	109890	GTATG_TAAAG	+	7	d3	4	34	9	12	8	1	0.000102556	0.000971651	0.00035085	0.000388815	0.000241095	3.46e-05	RPL17A	0	non	Gould et al		Kawashima et al
XI	551681	552022	GTATG_CCAAG	+	20	d3	8	4	25	21	3	8	0.000143942	7.04e-05	0.000867152	0.000533794	6.41e-05	0.00018086	RPS21A	0	non		Schreiber et al
VII	62100	62189	GTAAG_AATAG	+	32	u5	8	3	13	16	6	5	0.0242424	0.00632911	0.0135699	0.012945	0.00627615	0.00586167	TAN1	62173	TACTAAC
IV	1266770	1266845	GTTGT_CTTAG	-	16	d5	10	1	7	17	0	11	0.00782473	0.000580383	0.00432366	0.00801509	0	0.01	NCB2	1266790	TACTAAC
XII	987142	987233	GTATG_ATAAG	+	21	d3	10	0	4	14	0	4	0.0192678	0	0.0102041	0.0282828	0	0.0112045	TDA5	987204	AACTAAC		Schreiber et al
X	50269	50435	GTACG_TGCAG	-	24	u5	14	3	14	12	21	0	0.0123675	0.00299103	0.0122807	0.00772201	0.0221286	0	NCE101	50351	TACTAAC
VIII	126552	127332	GTACG_ACCAG	+	220	d3	16	0	8	25	0	0	0.000234055	0	0.000172697	0.000407226	0	0	RPL27A	0	non		Schreiber et al
XIV	331453	331837	GTATA_TTTAG	+	127	d5	17	0	34	50	26	51	0.000351632	0	0.00124771	0.00133447	0.000616362	0.00134896	RPL42A	331803	TACTAAC	Gould et al	Schreiber et al
II	170621	170757	GTATG_AAAAG	+	127	u5u3	23	4	6	23	15	3	0.0080504	0.00122437	0.00190295	0.00447906	0.00367017	0.000723415	LSM2	170731	AACTAAC	Gould et al
IX	316847	317171	GTACA_AACAG	+	75	d5	40	3	6	8	42	7	0.000456178	3.68e-05	0.000125326	0.000126606	0.00051262	0.000106909	RPL2B	317136	TACTAAC
VIII	526795	526929	GTGAA_TAGAG	-	134	newintron	0	0	4	18	2	0			inf	inf	inf		no_maches	0	non
XII	735133	735245	GCAGA_TTAAG	+	112	newintron	0	4	7	45	1	0		inf	inf	inf	inf		no_maches	0	non
XII	898158	898335	GTATG_ATTAG	+	177	newintron	0	0	7	17	9	16			inf	inf	inf	inf	no_maches	0	non
II	342699	342789	GTGTG_TCAAG	+	90	newintron	0	6	9	15	27	4	0	0.0096	0.00232979	0.00265111	0.00707547	0.00113347	YRO2	342757	TATTAAC	Gould et al
II	691967	692145	GTATG_AAAAG	+	178	newintron	0	16	13	21	19	5	0	0.00165033	0.00156269	0.00178921	0.00297479	0.000797067	PRP5	0	non
IV	122078	122194	GTATG_ATAAG	+	116	newintron	0	15	19	39	12	12		inf	inf	inf	inf	inf	no_maches	122160	TACTAAC	Gould et al	Schreiber et al
IV	268909	269030	GTATC_ATCAG	-	121	newintron	0	0	6	8	0	0			inf	inf			no_maches	268934	TACTGAC
IV	1063188	1063340	GTAAG_TCTAG	+	152	newintron	0	16	18	13	0	0	0	0.0016899	0.00196143	0.00107349	0	0	CFT1	0	non		Schreiber et al
V	475904	475969	GTCCG_TTGAG	+	65	newintron	0	5	31	18	0	0	0	0.000687947	0.00309876	0.00157041	0	0	OXA1	0	non
V	487821	487884	GTATG_ACTAG	+	63	newintron	0	0	7	11	0	0			inf	inf			no_maches	487860	TACTAAC
VII	414246	414333	GTATG_GCTAG	+	87	newintron	0	0	21	8	0	0	0	0	0.0172131	0.00428036	0	0	RIM8	414314	AACTAAC
VII	787787	788666	GTGTG_TTTAG	-	879	newintron	0	0	18	6	0	0			inf	inf			no_maches	0	non
VIII	400536	400850	GTATG_CGAAG	-	314	newintron	0	0	22	9	0	0	0	0	0.0066365	0.00188127	0	0	MTC6	400569	TACTGAC
XII	707751	707892	GTATG_TTCAG	-	141	newintron	0	18	16	7	0	0		inf	inf	inf			no_maches	0	non
XII	709175	709315	GTGGC_AAGAG	+	140	newintron	0	0	11	9	0	0			inf	inf			no_maches	0	non
XIII	633003	633041	GTTCC_AAAAG	+	38	newintron	0	14	14	13	0	9	0	3.55e-05	3.89e-05	2.53e-05	0	2.26e-05	HSC82	0	non
XV	325340	325495	GTATG_TCTAG	-	155	newintron	0	0	34	7	0	0			inf	inf			no_maches	0	non
XV	325346	325495	GTATG_GTCAG	-	149	newintron	0	0	12	7	0	1			inf	inf		inf	no_maches	0	non
XV	423658	423734	GTATG_TACAG	-	76	newintron	0	0	14	18	0	0	0	0	0.00270062	0.00311634	0	0	RSB1	423676	TACTGAC	Gould et al
XV	445410	445596	GTCTT_GTGAG	-	186	newintron	0	0	6	7	0	0			inf	inf			no_maches	0	non
XVI	260916	261057	GTATA_GAAAG	-	141	newintron	0	0	12	8	0	0	0	0	0.000260977	0.000134846	0	0	PEP4	0	non
IV	1222247	1222388	GTACG_ATTAG	-	141	newintron	0	2	15	10	7	0	0	0.000247647	0.00170416	0.000790701	0.000954719	0	VPS74	0	non
I	205978	206247	GTCTA_TGAAG	+	269	newintron	0	4	6	12	6	10	0	0.00155582	0.00802139	0.0103093	0.00561272	0.0110011	FLO1	0	non
VII	939701	939852	GTATT_AATAG	+	151	newintron	0	0	9	22	6	0	0	0	0.0028699	0.0051899	0.00188739	0	PET54	0	non
VIII	526390	526524	GTGAA_TAGAG	-	134	newintron	1	7	8	9	1	6	inf	inf	inf	inf	inf	inf	no_maches	0	non
XII	199088	199123	GCAAC_TTAAG	-	35	newintron	1	8	5	6	12	2	inf	inf	inf	inf	inf	inf	no_maches	0	non
III	228572	228701	GTATG_CACAG	+	129	newintron	1	8	12	8	0	0	0.000359195	0.00354767	0.00659703	0.00360523	0	0	BUD31	228657	AACTAAC
III	138478	138676	GTTTT_GCAAG	+	198	newintron	1	8	6	8	28	0	2.3e-06	1.84e-05	1.13e-05	1.04e-05	5.07e-05	0	PGK1	0	non
XIV	616067	616412	GTATG_CAAAG	+	345	newintron	1	0	30	33	0	10	0.000996016	0	0.0346021	0.0261905	0	0.00915751	IDP3	0	non	Gould et al	Schreiber et al
IV	757479	757883	GTCTT_ACTAG	-	404	newintron	2	11	7	8	0	0	inf	inf	inf	inf			no_maches	0	non
IV	676272	676405	GTACG_TGCAG	+	133	newintron	3	17	6	12	19	33	0.00141044	0.00779102	0.0031072	0.00425381	0.0105791	0.0168024	FOB1	676358	AACTAAC
IV	205886	205906	GTTGG_GAGAG	+	20	newintron	4	31	9	19	0	0	inf	inf	inf	inf			no_maches	0	non
XII	64529	64756	GTGGT_GAGAG	-	227	newintron	6	4	5	6	7	4	0.000199309	0.000128193	0.000162274	0.000138376	0.000415085	0.000248062	UBI4	0	non
IV	812389	812476	GCTGT_TCAAG	+	87	newintron	6	0	10	22	0	0	0.000219877	0	0.000501454	0.000907965	0	0	HMO1	0	non
VIII	30779	31603	GTATG_TCCAG	-	824	newintron	6	0	18	9	0	9	0.000774893	0	0.00111063	0.000434468	0	0.000755097	VMR1	0	non
VIII	315794	315860	GTATA_TACAG	+	66	newintron	6	0	17	14	0	0	inf		inf	inf			no_maches	0	non
VII	479634	479689	GTGTG_TTAAG	+	55	newintron	6	3	7	6	6	8	inf	inf	inf	inf	inf	inf	no_maches	0	non
XII	789135	789155	GTTTG_CACAG	-	20	newintron	7	2	4	14	6	2	inf	inf	inf	inf	inf	inf	no_maches	0	non
XV	31159	31221	GTTCA_ATCAG	-	62	newintron	7	4	6	15	3	11	0.000969663	0.000692042	0.00172761	0.00415053	0.000754337	0.00327869	HPF1	0	non
XII	64757	64984	GTGGT_GAGAG	-	227	newintron	9	3	6	10	4	4	0.000298964	9.61e-05	0.000194729	0.000230627	0.000237192	0.000248062	UBI4	0	non
XVI	115219	115293	GTATG_ATAAG	+	74	newintron	9	0	39	19	0	0	inf		inf	inf			no_maches	115270	TACTAAC
V	423825	423951	GTAGA_TTTAG	+	126	newintron	10	0	5	27	0	24	inf		inf	inf		inf	no_maches	0	non	Gould et al
XVI	381726	381840	GTAGG_CTCAG	+	114	newintron	10	4	6	6	0	0	inf	inf	inf	inf			no_maches	0	non
I	25756	25890	GTAAA_TAGAG	+	134	newintron	11	3	4	15	1	1	inf	inf	inf	inf	inf	inf	no_maches	0	non
XVI	560416	560519	GTAAG_AATAG	+	103	newintron	14	0	24	31	14	5	inf		inf	inf	inf	inf	no_maches	560471	TACTAAT
X	120850	121008	GTGCT_CAGAG	-	158	newintron	15	0	8	12	2	0	inf		inf	inf	inf		no_maches	0	non
X	462705	463585	GTAAG_TGCAG	+	880	newintron	16	4	19	10	13	0	0.00178671	0.000494499	0.00299354	0.00119303	0.00171459	0	YJR015W	0	non
XV	444978	445496	GTTTG_AAGAG	+	518	newintron	20	0	33	20	22	14	4.93e-05	0	0.00012627	5.37e-05	5.53e-05	3.78e-05	RPL3	0	non
XVI	231431	231577	GTAAG_AACAG	+	146	newintron	20	2	41	7	1	2	0.015456	0.00147711	0.0312024	0.00385887	0.00103842	0.00191755	YPL168W	0	non
I	205708	206247	GTCTA_TGAAG	+	539	newintron	25	3	7	27	14	12	0.0115367	0.00116686	0.00935829	0.0231959	0.0130964	0.0132013	FLO1	0	non
X	702119	702347	GTCAA_ACAAG	-	228	newintron_introncontaining	27	0	13	19	19	13	0.000133814	0	9.35e-05	0.000101278	9.3e-05	7.01e-05	RPS4A	0	non
IX	128067	128148	GTAAG_TGCAG	+	81	5UTR_intr	38	0	21	7	0	1	0.00208014	0	0.00132076	0.000360918	0	6.16e-05	SIM1	0	non
XII	242322	243419	GTATG_GACAG	+	739	d3	0	0	7	1	6	7	0	0	0.000223079	2.24e-05	0.000129232	0.000155393	RPS0B	242652	TACTAAC
II	170677	170844	GTATG_ATCAG	+	40	d3	0	5	9	3	10	16	0	0.00153046	0.00285442	0.000584226	0.00244678	0.00385821	LSM2	170731	AACTAAC		Schreiber et al	Kawashima et al
XIII	140091	140188	GTTTC_TACAG	-	5	u5	0	0	2	0	8	7	0	0	0.00124378	0	0.00490196	0.00487465	ERV41	140113	CACTAAC		Schreiber et al
XIII	552063	552495	GTACG_TTTAG	+	111	d5	0	23	0	11	12	18	0	0.000519844	0	0.000249614	0.00028236	0.000432277	RPS16A	0	non
XIII	652825	652893	GTAAA_AAAAG	-	71	u5u3	0	0	0	0	9	19	0	0	0	0	0.06	0.165217	CMC4	0	non
XIII	732466	732911	GTATG_CCAAG	+	36	d3	0	0	14	0	15	13	0	0	0.000254768	0	0.000230862	0.000227774	RPS10B	732835	TACTAAC		Schreiber et al	Kawashima et al
XIV	144855	145254	GTATG_CGAAG	-	295	d3	0	3	1	0	24	11	0	0.00840336	0.00201613	0	0.0808081	0.026764	IST1	145191	TACTAAC
II	604519	604927	GTATT_TTTAG	+	4	d5	0	3	0	0	9	12	0	2.44e-05	0	0	7.26e-05	0.000109441	RPS9B	0	non
II	653369	653490	GTATG_AACAG	+	38	d3	0	0	0	0	5	17	0	0	0	0	0.019084	0.0772727	HPC2	653429	GATTAAC		Schreiber et al
II	653369	653558	GTATG_AACAG	+	106	d3	0	8	2	4	10	7	0	0.0255591	0.00696864	0.0107239	0.0381679	0.0318182	HPC2	653429	GATTAAC
IV	1103810	1103881	GTATG_AGTAG	+	11	u3	0	4	2	19	9	4	0	0.00527009	0.00343643	0.021814	0.014827	0.00753296	MCM21	1103871	CACTAAC		Schreiber et al
VI	64588	64920	GTACG_GAAAG	-	12	d3	0	7	32	0	27	11	0	0.00542215	0.0151947	0	0.00945378	0.00441767	RPL22B	64615	TACTAAC		Schreiber et al
VII	73026	73137	GTACG_TATAG	-	37	u3	0	4	0	19	8	23	0	0.000873362	0	0.00341788	0.00168563	0.00571145	OST5	73034	TACTAAC
VIII	126552	126829	GTACG_GGCAG	+	283	u3	0	2	0	0	15	7	0	2.76e-05	0	0	0.000212929	0.000106135	RPL27A	0	non
IV	217817	218007	GTTTG_AATAG	+	214	d5	1	0	0	0	18	7	3.04e-05	0	0	0	0.000637146	0.000289161	RPL35B	217970	TACTAAC
VIII	126556	127112	GTATC_CACAG	+	4	d5	2	10	30	3	16	7	2.93e-05	0.000137901	0.000647612	4.89e-05	0.000227124	0.000106135	RPL27A	0	non
XII	712726	713247	GTATG_TTTAG	-	92	u5	2	2	0	5	19	6	2.15e-05	2.25e-05	0	6.59e-05	0.000230877	8.91e-05	RPS30A	0	non		Schreiber et al
XV	93844	94319	GTTAG_TTTAG	-	29	u5	2	15	0	6	6	13	2.08e-05	0.000156081	0	7.49e-05	6.73e-05	0.000162754	RPL18A	93868	TACTAAC
XVI	218651	218728	GTCTA_GAGAG	+	22	d5u3	4	29	5	2	7	9	0.0156863	0.0702179	0.0714286	0.00934579	0.0300429	0.0743802	SPT14	218695	GAAGATC
X	50322	50411	GTATG_CGAAG	-	53	u3	6	0	19	0	16	13	0.00530035	0	0.0166667	0	0.0168599	0.0153121	NCE101	50351	TACTAAC	Gould et al	Schreiber et al
XV	867150	867745	GTATG_TGAAG	+	159	d3	6	4	8	3	7	4	6.57e-05	4.29e-05	0.000113535	3.51e-05	7.99e-05	5.01e-05	RPS10A	867516	TACTAAC		Schreiber et al
VII	311400	311526	GTTGT_TACAG	+	384	d5	6	2	45	2	18	22	5.18e-05	1.69e-05	0.000593245	1.87e-05	0.000175051	0.000213615	RPL28	311486	TACTAAC
X	91095	91424	GTATG_TCTAG	+	13	d3	7	0	7	0	34	7	0.000355042	0	0.000346295	0	0.00143062	0.000334304	RPL17B	0	non
VI	203285	203386	GTATG_AGCAG	-	8	d3	7	0	6	3	6	11	0.00216785	0	0.00210452	0.00097371	0.0023678	0.0048014	LSB3	203304	TACTAAC
XIV	557575	557684	GTACG_TGCAG	+	36	u5	9	0	1	1	15	4	0.028754	0	0.0020202	0.00120048	0.0246305	0.00896861	GPI15	557672	TACTAAC	Gould et al	Schreiber et al
XVI	406647	407079	GTATG_TACAG	+	12	d3	12	0	0	9	7	11	0.000234765	0	0	0.000203142	0.000154693	0.00026396	RPL21B	407002	TACTAAC
IV	1073339	1073401	GTATG_TGGAG	-	26	u3	16	4	0	21	19	17	0.0334029	0.00852879	0	0.035	0.0505319	0.0442708	HNT2	1073346	TACTAAC		Schreiber et al
IX	231958	232392	GTACC_TATAG	-	26	u5	16	2	0	5	14	6	0.000500579	6.28e-05	0	0.000218818	0.000517617	0.000246751	RPS24B	232012	TACTAAC
XVI	282141	282677	GTATG_CAAAG	+	12	d3	18	0	0	0	22	7	0.000153734	0	0	0	0.000209277	8.48e-05	RPL33A	0	non
IX	316772	317175	GTATG_GGTAG	+	4	d3	19	0	0	0	14	6	0.000216685	0	0	0	0.000170873	9.16e-05	RPL2B	317136	TACTAAC
VIII	127176	127264	GTTCC_AGAAG	+	88	newintron_introncontaining	0	0	13	5	20	5	0	0	0.000143125	4.25e-05	0.000150192	3.95e-05	RPL27A	0	non
X	517540	517614	GTACG_AATAG	-	74	newintron	0	12	0	0	5	10	0	0.00808625	0	0	0.00343879	0.00668896	POL32	0	non
X	632977	633060	GTATG_TAAAG	-	83	newintron	0	11	0	45	10	7	0	0.00042875	0	0.001193	0.000221459	0.000157875	CPA2	632997	AACTAAC
X	702180	702347	GTCAA_TCAAG	-	167	newintron_introncontaining	0	10	0	0	13	13	0	5.11e-05	0	0	6.36e-05	7.01e-05	RPS4A	0	non
X	702180	702418	GTAAG_TCAAG	-	238	newintron_introncontaining	0	10	0	0	7	7	0	5.11e-05	0	0	3.43e-05	3.77e-05	RPS4A	0	non
XII	382301	382412	GTATG_TTTAG	+	111	newintron	0	18	0	10	14	16		inf		inf	inf	inf	no_maches	382367	TATTAAC
XIII	552816	552847	GTTCT_ACAAG	-	31	newintron	0	0	0	0	6	5					inf	inf	no_maches	0	non
XV	527185	527258	GTATG_AGCAG	+	73	newintron	0	0	6	0	6	11	0	0	0.000523697	0	0.000472962	0.000893582	INP53	527238	TACTAAT
XV	733244	733416	GCATG_TACAG	-	172	newintron	0	0	0	0	23	35	0	0	0	0	0.0013975	0.00209694	RET1	733356	AACTAAC
XV	1003962	1004223	GTAGG_TTCAG	-	261	newintron	0	0	0	6	7	7				inf	inf	inf	no_maches	0	non
XVI	351691	351771	GTTAG_AAAAG	-	80	newintron	0	0	0	0	18	10	0	0	0	0	7.96e-05	4.72e-05	SSE1	0	non
II	681004	681403	GTTGG_TAAAG	-	399	newintron	0	0	0	0	18	6					inf	inf	no_maches	0	non
IV	268909	269043	GTATG_ATCAG	-	134	newintron	0	0	0	7	5	5				inf	inf	inf	no_maches	268934	TACTGAC
IV	392593	392730	GTATG_TATAG	+	137	newintron	0	0	0	10	12	6				inf	inf	inf	no_maches	392682	TATTAAC
IV	600990	601031	GTACC_TTGAG	-	41	newintron	0	2	0	2	15	4		inf		inf	inf	inf	no_maches	0	non
IV	1245537	1245738	GCCTA_GCAAG	+	201	newintron	0	14	1	5	36	7	0	6.5e-05	5.76e-06	2.08e-05	0.000156488	3.29e-05	EFT2	0	non
IV	1248111	1248258	GTATA_TTCAG	-	147	newintron	0	0	0	0	5	16	0	0	0	0	0.000661463	0.00220386	YDR387C	0	non
IX	173059	173606	GTCTG_AACAG	-	547	newintron	0	0	3	0	7	7	0	0	0.000806885	0	0.00191519	0.00249554	YIL102C-A	0	non
IX	266547	266647	GTTCA_ATTAG	-	100	newintron	0	0	0	0	17	9	0	0	0	0	0.00157102	0.000862565	SYG1	0	non
V	389380	389448	GTTTT_GTCAG	-	68	newintron	0	0	0	0	10	12	0	0	0	0	0.00168805	0.00234329	TMN3	0	non
VI	94450	94724	GTCGG_TTGAG	+	274	newintron	0	0	2	17	18	6			inf	inf	inf	inf	no_maches	0	non
VII	787787	788015	GTACA_TTTAG	-	228	newintron	0	3	0	18	44	5		inf		inf	inf	inf	no_maches	0	non
VIII	75436	75501	GTTGA_CCAAG	+	65	newintron	0	14	0	27	15	17	0	8.42e-05	0	0.000185829	9.47e-05	0.000115324	RPS20	0	non
VIII	75502	75594	GTTAA_CCAAG	+	92	newintron	0	0	0	10	11	5	0	0	0	6.88e-05	6.95e-05	3.39e-05	RPS20	0	non
X	236903	237023	GTATG_TGTAG	+	120	newintron	1	0	0	19	12	10	0.000271003	0	0	0.00414666	0.00244598	0.00234687	LSB6	237006	CACTGAC
XIII	689779	689840	GCGGT_AAAAG	+	61	newintron	1	0	16	3	8	7	0.000384911	0	0.00539447	0.000704225	0.00293363	0.00296484	DML1	0	non
I	25486	25620	GTGAA_TAGAG	+	134	newintron	1	0	0	6	6	10	inf			inf	inf	inf	no_maches	0	non
II	681111	681340	GTTAA_CGAAG	+	229	newintron	1	0	1	27	22	15	inf		inf	inf	inf	inf	no_maches	0	non
VIII	526525	526659	GTGAA_TAGAG	-	134	newintron	2	4	11	4	11	7	inf	inf	inf	inf	inf	inf	no_maches	0	non
IV	340811	341183	GTATG_TATAG	-	372	newintron	2	22	0	14	27	30	inf	inf		inf	inf	inf	no_maches	0	non	Gould et al
VIII	282866	283273	GTGGC_CCCAG	-	407	newintron	3	2	5	5	8	9	0.000533998	0.000364498	0.00135208	0.000879972	0.00129723	0.00149254	GAR1	0	non
XV	31113	31151	GTTGA_CGGAG	+	38	newintron	3	6	5	4	6	8	inf	inf	inf	inf	inf	inf	no_maches	0	non
IV	1328913	1328945	GTGGT_AGCAG	-	32	newintron	3	6	0	0	8	5	inf	inf			inf	inf	no_maches	0	non
I	205481	205615	GTAAA_TAGAG	-	134	newintron	3	6	3	8	5	4	inf	inf	inf	inf	inf	inf	no_maches	0	non
I	205751	205885	GTAAA_TAGAG	-	134	newintron	3	21	2	2	5	6	inf	inf	inf	inf	inf	inf	no_maches	0	non
X	702119	702313	GTAAG_ACAAG	-	194	newintron_introncontaining	4	7	0	2	31	10	1.98e-05	3.58e-05	0	1.07e-05	0.000151759	5.39e-05	RPS4A	0	non
VII	479636	479689	GTGTG_TTAAG	+	53	newintron	5	3	25	5	6	6	inf	inf	inf	inf	inf	inf	no_maches	0	non
VII	479640	479689	GTGTG_TTAAG	+	49	newintron	5	1	3	3	9	17	inf	inf	inf	inf	inf	inf	no_maches	0	non
XII	848808	849095	GTACC_AAAAG	-	287	newintron	6	1	0	0	22	12	0.00112233	0.00017322	0	0	0.00454639	0.00231705	DCR2	0	non
XV	548506	548567	GCAGG_GTAAG	-	61	newintron	7	0	5	0	7	31	inf		inf		inf	inf	no_maches	0	non
VII	594126	594198	GTATG_CAGAG	-	72	newintron	11	0	12	0	8	6	inf		inf		inf	inf	no_maches	594141	TACTAAC
IX	366557	366592	GTTGA_AACAG	+	35	newintron	15	0	2	8	6	11	inf		inf	inf	inf	inf	no_maches	0	non

## Sheet: 244_Alternative_splicing_events
in_frame	chromosome	start	end	5'SS_3'SS	strand	shift_from_annotated_splice_site	event	Novel_reads_FAST_A	Novel_reads_FAST_B	Novel_reads_SLOW_A	Novel_reads_SLOW_B	Novel_reads_WT_A	Novel_reads_WT_B	annotated_junction_reads_FAST_A	annotated_junction_reads_FAST_B	annotated_junction_reads_SLOW_A	annotated_junction_reads_SLOW_B	annotated_junction_reads_WT_A	annotated_junction_reads_WT_B	SEF_FAST_A	SEF_FAST_B	SEF_SLOW_A	SEF_SLOW_B	SEF_WT_A	SEF_WT_B
no	VIII	354808	354955	GTATA_GATAG	+	57	u5	6	29	1	1	17	7	997	996	798	1033	931	844	0.00601805	0.0291165	0.00125313	0.000968054	0.0182599	0.00829384
no	X	387349	387449	GTAGG_AACAG	-	14	u5	6	6	8	4	18	7	346	427	161	320	172	212	0.017341	0.0140515	0.0496894	0.0125	0.104651	0.0330189
no	XIV	534875	534980	GTCTG_TGCAG	-	15	u5	6	12	11	4	14	1	295	457	304	273	224	225	0.020339	0.0262582	0.0361842	0.014652	0.0625	0.00444444
no	XII	819331	819796	GTATG_AGAAG	+	19	d3	6	6	1	1	1	1	39566	36821	23243	30570	38862	33294	0.000151645	0.00016295	4.3e-05	3.27e-05	2.57e-05	3e-05
no	XV	93844	94195	GTAAG_TTTAG	-	95	d5	6	40	1	28	1	24	96309	96105	53462	80130	89161	79876	6.23e-05	0.000416211	1.87e-05	0.000349432	1.12e-05	0.000300466
yes	IV	733686	733775	GTATG_AACAG	-	17	d3	6	16	22	36	42	15	5188	5781	5509	6267	4208	4444	0.00115652	0.00276769	0.00399346	0.00574438	0.00998099	0.00337534
no	XIII	732466	733034	GTATG_TGAAG	+	159	d3	7	8	4	5	6	7	76354	73297	54953	65269	64975	57075	9.17e-05	0.000109145	7.28e-05	7.66e-05	9.23e-05	0.000122646
no	XIV	622945	623300	GTATG_AGTAG	+	14	d3	7	14	1	18	16	1	1089	906	895	1063	884	650	0.00642792	0.0154525	0.00111732	0.0169332	0.0180995	0.00153846
no	XVI	404941	405457	GTATA_AACAG	+	16	u5	7	9	1	11	17	9	3410	3559	6288	7422	7836	6185	0.00205279	0.0025288	0.000159033	0.00148208	0.00216947	0.00145513
no	XII	522674	523028	GTAGT_AATAG	+	4	d5	7	21	11	1	1	1	45046	40308	30736	36843	41806	39507	0.000155397	0.000520988	0.000357887	2.71e-05	2.39e-05	2.53e-05
no	XVI	654474	654570	GTATA_TACAG	+	306	d5	7	18	1	1	1	1	121552	114581	53386	66008	92427	75108	5.76e-05	0.000157094	1.87e-05	1.51e-05	1.08e-05	1.33e-05
yes	XI	158805	158966	GTATG_AACAG	+	189	d5	8	14	1	1	13	2	13865	13513	9146	12407	16446	14506	0.000576992	0.00103604	0.000109337	8.06e-05	0.000790466	0.000137874
yes	XVI	795030	795422	GTATG_AGAAG	+	28	d3	8	7	1	1	3	9	87929	91587	57404	80409	81129	76658	9.1e-05	7.64e-05	1.74e-05	1.24e-05	3.7e-05	0.000117405
no	III	101634	101790	GTATG_AATAG	-	90	u5	8	9	1	1	1	1	773	852	627	670	581	582	0.0103493	0.0105634	0.0015949	0.00149254	0.00172117	0.00171821
no	VII	556132	556307	GTACG_AATAG	+	301	d5	8	6	1	5	1	1	112534	109285	64416	84537	96898	90449	7.11e-05	5.49e-05	1.55e-05	5.91e-05	1.03e-05	1.11e-05
no	XIV	331728	331837	GTTAT_TTTAG	+	402	d5	8	10	1	1	1	1	48347	46447	27251	37469	42184	37808	0.00016547	0.000215299	3.67e-05	2.67e-05	2.37e-05	2.64e-05
no	XII	987142	987221	GTATG_CTAAG	+	9	d3	9	40	14	14	18	17	520	324	393	496	347	358	0.0173077	0.123457	0.0356234	0.0282258	0.0518732	0.047486
yes	VII	543639	543755	GTATG_TTCAG	+	34	d3	9	14	1	9	1	1	2036	1835	1487	2018	1813	1557	0.00442043	0.00762943	0.000672495	0.00445986	0.000551572	0.000642261
no	IV	1355268	1355550	GTACG_TTAAG	-	31	u3	9	8	11	10	13	5	34043	38427	21803	27738	28535	24121	0.000264372	0.000208187	0.000504518	0.000360516	0.000455581	0.000207288
yes	XII	987142	987339	GTATG_TTAAG	+	127	d3	10	7	21	7	9	21	520	324	393	496	347	358	0.0192308	0.0216049	0.0534351	0.0141129	0.0259366	0.0586592
no	II	426494	426873	GTATG_ACTAG	-	23	d3	10	8	8	38	1	13	2064	1798	2092	2557	1870	1538	0.00484496	0.00444939	0.00382409	0.0148612	0.000534759	0.00845254
yes	IV	254949	255044	GTATG_TGAAG	-	26	d3	10	27	1	24	1	1	363	293	354	379	146	194	0.0275482	0.0921502	0.00282486	0.0633245	0.00684931	0.00515464
no	VII	555831	555912	GTATG_AAGAG	+	395	u3	10	16	1	1	1	1	112534	109285	64416	84537	96898	90449	8.89e-05	0.000146406	1.55e-05	1.18e-05	1.03e-05	1.11e-05
yes	VIII	129216	129647	GTATG_AGTAG	+	313	u5	10	11	1	1	1	1	1735	1698	1491	2242	1867	1657	0.00576369	0.00647821	0.000670691	0.00044603	0.000535619	0.0006035
yes	X	608483	608581	GTAGG_TGCAG	+	176	d5	10	12	1	12	1	1	21973	22731	9772	13579	15110	14146	0.000455104	0.000527913	0.000102333	0.000883718	6.62e-05	7.07e-05
no	XII	522817	523028	GTATG_AATAG	+	147	d5	10	9	1	11	1	1	45046	40308	30736	36843	41806	39507	0.000221995	0.000223281	3.25e-05	0.000298564	2.39e-05	2.53e-05
no	XIII	223235	223781	GTATG_AGAAG	-	146	d3	10	11	1	4	1	1	42473	47323	30305	45169	45564	46279	0.000235444	0.000232445	3.3e-05	8.86e-05	2.19e-05	2.16e-05
no	XV	80361	80779	GTATG_CTAAG	+	5	d3	10	7	1	1	1	3	105590	102293	57610	77567	84519	82977	9.47e-05	6.84e-05	1.74e-05	1.29e-05	1.18e-05	3.62e-05
no	XVI	305307	305422	GTATG_AAAAG	+	11	d3	10	7	30	3	1	8	1386	1577	1027	1455	1155	1308	0.00721501	0.00443881	0.0292113	0.00206186	0.000865801	0.00611621
no	VIII	126637	127112	GTATA_CACAG	+	85	d5	11	19	1	7	3	2	68361	72517	46325	61392	70447	65955	0.00016091	0.000262008	2.16e-05	0.000114021	4.26e-05	3.03e-05
no	XIII	337818	337917	GTACG_CCCAG	+	14	d3	11	33	1	15	17	25	1565	1458	1360	1771	875	1316	0.00702875	0.0226337	0.000735294	0.00846979	0.0194286	0.018997
no	XIV	443781	444171	GTATG_CCCAG	-	46	d3	11	12	19	1	3	47	27448	24137	21457	23248	30524	25160	0.000400758	0.000497162	0.000885492	4.3e-05	9.83e-05	0.00186805
no	XVI	404957	405467	GTACG_CCAAG	+	10	d3	11	11	28	18	37	10	3410	3559	6288	7422	7836	6185	0.00322581	0.00309076	0.00445293	0.00242522	0.0047218	0.00161681
yes	VIII	104406	104696	GTATG_TGTAG	+	107	u3	11	7	5	5	1	1	29238	27653	16615	22605	21984	21555	0.000376223	0.000253137	0.000300933	0.00022119	4.55e-05	4.64e-05
no	XVI	654168	654579	GTATG_AAAAG	+	9	d3	11	25	13	1	1	1	121552	114581	53386	66008	92427	75108	9.05e-05	0.000218186	0.00024351	1.51e-05	1.08e-05	1.33e-05
no	IV	1450458	1450590	GTGAG_AACAG	-	256	d5	11	7	1	7	11	1	92105	79078	46310	57860	72520	59427	0.000119429	8.85e-05	2.16e-05	0.000120982	0.000151682	1.68e-05
no	XII	242322	242712	GTATG_GCTAG	+	32	d3	12	11	1	12	15	2	57442	55229	31380	44585	46429	45048	0.000208906	0.000199171	3.19e-05	0.000269149	0.000323074	4.44e-05
no	XIII	225892	226294	GTATG_GGTAG	+	5	d3	12	78	42	19	7	1	108547	102961	57388	74618	102379	77270	0.000110551	0.000757568	0.00073186	0.00025463	6.84e-05	1.29e-05
no	XIII	732466	732878	GTATG_AGAAG	+	3	d3	12	9	11	3	19	1	76354	73297	54953	65269	64975	57075	0.000157163	0.000122788	0.000200171	4.6e-05	0.00029242	1.75e-05
yes	II	726826	727011	GTATG_TATAG	-	92	d3	13	16	18	14	16	18	528	453	504	776	505	339	0.0246212	0.0353201	0.0357143	0.0180412	0.0316832	0.0530973
no	XIII	666947	667017	GTATG_ATGAG	-	13	u3	13	21	1	10	1	1	250	354	406	345	202	264	0.052	0.059322	0.00246305	0.0289855	0.0049505	0.00378788
no	IV	1450458	1450540	GTTGT_AACAG	-	306	d5	13	13	12	4	4	2	92105	79078	46310	57860	72520	59427	0.000141143	0.000164395	0.000259123	6.91e-05	5.52e-05	3.37e-05
no	XII	819331	819793	GTATG_GACAG	+	16	d3	14	41	4	9	38	13	39566	36821	23243	30570	38862	33294	0.000353839	0.00111349	0.000172095	0.000294406	0.000977819	0.000390461
no	VII	555831	556323	GTATG_GACAG	+	16	d3	14	18	2	1	26	8	112534	109285	64416	84537	96898	90449	0.000124407	0.000164707	3.1e-05	1.18e-05	0.000268323	8.84e-05
no	VII	556226	556307	GTGTG_AATAG	+	395	d5	14	9	1	1	2	1	112534	109285	64416	84537	96898	90449	0.000124407	8.24e-05	1.55e-05	1.18e-05	2.06e-05	1.11e-05
no	XIV	62371	62923	GTACG_TAGAG	-	2	d3	15	30	34	37	14	19	58664	58840	36043	46579	49512	45192	0.000255693	0.000509857	0.000943318	0.000794349	0.00028276	0.000420428
no	X	435232	435343	GTATA_AATAG	+	4	d5	15	28	16	20	1	9	5756	5565	4559	6310	4793	3756	0.00260598	0.00503145	0.00350954	0.00316957	0.000208638	0.00239617
yes	V	396811	397431	GTATG_AAAAG	+	150	d3	15	9	26	11	5	3	90045	83053	56064	75670	88482	72861	0.000166583	0.000108365	0.000463756	0.000145368	5.65e-05	4.12e-05
no	IV	715246	715358	GTATG_TAGAG	-	2	d3	16	22	32	16	4	1	5649	5590	3904	6048	4848	4443	0.00283236	0.0039356	0.00819672	0.0026455	0.000825083	0.000225073
no	IV	715192	715358	GTATG_TTCAG	-	56	d3	17	39	40	35	3	38	5649	5590	3904	6048	4848	4443	0.00300938	0.00697674	0.0102459	0.00578704	0.000618812	0.00855278
no	VII	311229	311526	GTACT_TACAG	+	213	d5	17	25	12	16	31	5	115770	118246	75855	106945	102828	102990	0.000146843	0.000211424	0.000158197	0.00014961	0.000301474	4.85e-05
no	VII	556228	556307	GTGGA_AATAG	+	397	d5	18	38	1	8	1	1	112534	109285	64416	84537	96898	90449	0.000159952	0.000347715	1.55e-05	9.46e-05	1.03e-05	1.11e-05
yes	IV	117667	118170	GTATG_TAAAG	+	13	d3	18	13	1	12	48	5	68334	68304	32263	40936	45370	36599	0.000263412	0.000190326	3.1e-05	0.000293141	0.00105797	0.000136616
no	XIV	145181	145254	GTATG_AGAAG	-	31	u3	18	16	17	13	1	18	302	358	497	652	298	412	0.0596026	0.0446927	0.0342052	0.0199386	0.00335571	0.0436893
no	IV	1450456	1450846	GTATG_CAGAG	-	2	d3	18	16	1	18	13	14	92105	79078	46310	57860	72520	59427	0.000195429	0.000202332	2.16e-05	0.000311096	0.000179261	0.000235583
yes	II	333321	333386	GTAGG_TACAG	+	445	d5	19	22	1	12	28	2	66291	64162	36324	46748	55456	48067	0.000286615	0.000342882	2.75e-05	0.000256695	0.000504905	4.16e-05
yes	IV	254943	255044	GTATG_AGCAG	-	32	d3	19	9	10	17	16	2	363	293	354	379	146	194	0.0523416	0.0307167	0.0282486	0.0448549	0.109589	0.0103093
no	II	60150	60697	GTATG_AACAG	-	44	d3	20	27	65	4	2	44	60223	63235	38513	53180	54256	49498	0.000332099	0.000426979	0.00168774	7.52e-05	3.69e-05	0.000888925
yes	II	186266	186427	GTATG_CGTAG	-	87	d3	20	9	9	5	26	12	1135	1216	1712	2263	1655	1691	0.0176211	0.00740132	0.00525701	0.00220946	0.01571	0.00709639
no	IV	1401801	1402404	GTACG_ACCAG	+	220	d3	20	9	1	6	1	1	17782	19107	14092	20150	20430	20472	0.00112473	0.000471032	7.1e-05	0.000297767	4.89e-05	4.88e-05
no	XII	242322	242826	GTATG_TCCAG	+	146	d3	20	43	8	16	1	18	57442	55229	31380	44585	46429	45048	0.000348177	0.000778576	0.000254939	0.000358865	2.15e-05	0.000399574
no	XII	522670	523030	GTATG_TAGAG	+	2	d3	20	10	1	1	1	1	45046	40308	30736	36843	41806	39507	0.000443991	0.00024809	3.25e-05	2.71e-05	2.39e-05	2.53e-05
no	IX	47703	47760	GTACC_GTTAG	+	4	d5	20	9	4	13	11	3	1286	1807	1172	1839	1418	1403	0.0155521	0.00498063	0.00341297	0.00706906	0.00775741	0.00213827
no	XIII	666909	667017	GTATG_AATAG	-	25	d3	21	20	21	47	28	26	250	354	406	345	202	264	0.084	0.0564972	0.0517241	0.136232	0.138614	0.0984848
no	II	592398	592768	GTATG_CCCAG	-	19	d3	21	10	1	1	1	4	66700	65744	41846	56804	64690	55861	0.000314843	0.000152105	2.39e-05	1.76e-05	1.55e-05	7.16e-05
yes	XII	931336	931698	GTATG_GTCAG	-	14	d3	22	62	64	70	15	59	18838	19212	18561	23903	23313	22070	0.00116785	0.00322715	0.00344809	0.0029285	0.000643418	0.00267331
yes	XV	505938	506030	GTATG_TCTAG	+	308	u3	22	33	1	1	5	12	79165	78585	50159	70120	76822	67019	0.000277901	0.000419927	1.99e-05	1.43e-05	6.51e-05	0.000179054
yes	X	608307	608588	GTATG_CTAAG	+	7	d3	22	9	1	1	1	1	21973	22731	9772	13579	15110	14146	0.00100123	0.000395935	0.000102333	7.36e-05	6.62e-05	7.07e-05
yes	IV	579479	580024	GTATG_TAAAG	+	7	d3	22	39	7	21	9	53	66200	68076	37537	54740	61248	58099	0.000332326	0.000572889	0.000186483	0.000383632	0.000146944	0.000912236
no	XIII	753743	754215	GTAAA_ATCAG	-	4	d5	23	18	1	3	7	15	28569	30997	14413	20627	25191	22162	0.000805068	0.000580701	6.94e-05	0.00014544	0.000277877	0.000676834
no	XV	900768	901174	GTATG_AACAG	-	19	d5	23	21	1	2	14	1	35856	35999	20160	29444	33582	29587	0.000641455	0.00058335	4.96e-05	6.79e-05	0.00041689	3.38e-05
no	XV	912171	912432	GTATG_CTTAG	-	85	u3	24	22	26	26	25	4	0	0	0	0	0	0
no	IV	65307	65403	GTATG_CCTAG	+	26	d3	24	20	28	90	46	10	1922	2933	1954	3020	2518	2395	0.012487	0.00681896	0.0143296	0.0298013	0.0182685	0.00417537
no	XV	867150	867589	GTATG_AGAAG	+	3	d3	24	49	12	21	1	17	91271	93144	70464	85435	87605	79811	0.000262953	0.000526067	0.0001703	0.000245801	1.14e-05	0.000213003
no	V	269788	270148	GTATG_ATGAG	-	36	u3	24	25	6	6	21	31	68599	54772	49454	53360	68033	54247	0.000349859	0.000456438	0.000121325	0.000112444	0.000308674	0.00057146
no	VIII	126548	127112	GTTGG_CACAG	+	4	u5	24	40	37	49	50	48	68361	72517	46325	61392	70447	65955	0.000351077	0.000551595	0.000798705	0.00079815	0.000709753	0.000727769
yes	X	73797	74216	GTACG_TCAAG	+	12	d3	25	28	1	1	2	6	11696	9734	5316	6315	14238	10648	0.00213748	0.00287652	0.000188111	0.000158353	0.000140469	0.000563486
no	XI	437838	437925	GTATG_GAAAG	+	20	d3	25	31	34	11	21	39	1577	1379	1310	1626	1097	835	0.0158529	0.0224801	0.0259542	0.00676507	0.0191431	0.0467066
yes	XV	778860	779252	GTATG_GATAG	-	134	d5	25	34	10	11	28	10	32929	31715	19750	25680	34181	29523	0.000759209	0.00107205	0.000506329	0.000428349	0.000819169	0.000338719
no	XIII	666786	667017	GTATG_TGCAG	-	148	d3	25	9	1	1	1	16	250	354	406	345	202	264	0.1	0.0254237	0.00246305	0.00289855	0.0049505	0.0606061
yes	VI	64354	64920	GTACG_AGAAG	-	246	d3	25	16	1	4	22	5	1602	1292	2107	2524	2857	2491	0.0156055	0.0123839	0.000474608	0.00158479	0.00770038	0.00200723
no	II	168601	168808	GTACG_CACAG	+	176	d5	26	13	1	1	1	8	51229	47641	32623	42021	48911	41605	0.000507525	0.000272874	3.07e-05	2.38e-05	2.04e-05	0.000192285
no	IV	629906	630056	GTATG_TCCAG	+	117	u3	26	16	19	35	29	9	2916	2886	2742	3218	2473	2428	0.00891632	0.00554401	0.00692925	0.0108763	0.0117266	0.00370675
no	VII	727039	727385	GTATG_AGAAG	+	28	d3	26	8	1	14	30	15	52243	47993	37360	49968	49491	43293	0.000497674	0.000166691	2.68e-05	0.000280179	0.000606171	0.000346476
no	XIII	82291	82351	GTATG_TTAAG	+	22	u3	27	6	7	11	1	13	832	806	872	955	804	711	0.0324519	0.00744417	0.00802752	0.0115183	0.00124378	0.0182841
yes	X	75554	76324	GTATG_ATTAG	+	385	u5	40	45	1	1	5	1	41638	42758	31117	45781	40296	37597	0.000672463	0.000561298	3.21e-05	2.18e-05	0.000124082	2.66e-05
yes	II	393181	393507	GTATG_CTAAG	+	3	u3	28	81	109	144	57	89	7104	6925	7209	12356	9227	9304	0.00394144	0.0116968	0.01512	0.0116543	0.00617752	0.00956578
no	XVI	492948	493020	GTATG_ACGAG	-	29	u3	28	50	57	21	63	28	1398	979	1231	1345	649	652	0.0200286	0.0510725	0.0463038	0.0156134	0.0970724	0.0429448
yes	II	653369	653524	GTATG_AACAG	+	72	d3	28	42	32	49	15	47	365	314	288	374	263	221	0.0767123	0.133758	0.111111	0.131016	0.0570342	0.21267
no	XIII	666942	667017	GTATG_ATGAG	-	8	u3	29	21	9	10	14	1	250	354	406	345	202	264	0.116	0.059322	0.0221675	0.0289855	0.0693069	0.00378788
no	XVI	795135	795394	GTAAG_AACAG	+	105	d5	32	19	15	18	11	6	87929	91587	57404	80409	81129	76658	0.00036393	0.000207453	0.000261306	0.000223856	0.000135587	7.83e-05
no	VII	556156	556307	GTAGG_AATAG	+	325	d5	32	40	4	8	1	3	112534	109285	64416	84537	96898	90449	0.000284359	0.000366015	6.21e-05	9.46e-05	1.03e-05	3.32e-05
yes	VIII	251156	251458	GTATG_TACAG	+	210	d3	33	24	1	27	29	4	1359	1383	957	1168	792	676	0.0242826	0.0173536	0.00104493	0.0231164	0.0366162	0.00591716
no	XIII	732466	732844	GTATG_GGAAG	+	31	u3	33	90	77	85	48	39	76354	73297	54953	65269	64975	57075	0.000432197	0.00122788	0.0014012	0.0013023	0.000738746	0.000683311
no	VII	555831	555910	GTATG_GCAAG	+	397	u3	33	39	34	38	3	12	112534	109285	64416	84537	96898	90449	0.000293245	0.000356865	0.000527819	0.000449507	3.1e-05	0.000132671
no	XVI	305307	305415	GTATG_GACAG	+	4	d3	34	19	26	8	12	45	1386	1577	1027	1455	1155	1308	0.024531	0.0120482	0.0253165	0.00549828	0.0103896	0.0344037
no	XII	522670	522725	GTATG_TGGAG	+	303	u3	35	20	5	26	1	1	45046	40308	30736	36843	41806	39507	0.000776984	0.000496179	0.000162676	0.000705697	2.39e-05	2.53e-05
no	VIII	138237	138408	GTATG_GGAAG	-	4	d3	36	24	27	19	12	69	1269	1223	897	1278	824	637	0.0283688	0.0196239	0.0301003	0.014867	0.0145631	0.10832
no	XIII	551952	552510	GTATG_AGAAG	+	15	d3	37	78	15	8	5	23	40959	44245	31902	44069	42500	41641	0.000903342	0.00176291	0.00047019	0.000181534	0.000117647	0.00055234
no	VI	64592	64920	GTACG_TCCAG	-	8	d3	37	14	50	13	76	67	1602	1292	2107	2524	2857	2491	0.0230961	0.0108359	0.0237304	0.00515056	0.0266013	0.0268968
no	XI	625902	625986	GTAAG_TAAAG	+	10	d3	38	25	15	16	25	1	2202	2018	1586	2091	1782	1328	0.017257	0.0123885	0.00945775	0.00765184	0.0140292	0.000753012
no	IV	579465	580017	GTATG_AACAG	+	14	u5	38	52	56	15	32	19	66200	68076	37537	54740	61248	58099	0.000574018	0.000763852	0.00149186	0.000274023	0.000522466	0.000327028
no	X	74114	74204	GTTGT_TATAG	+	317	d5	39	36	93	58	95	140	11696	9734	5316	6315	14238	10648	0.00333447	0.00369838	0.0174944	0.00918448	0.00667229	0.013148
no	II	125155	125317	GTATG_TTTAG	+	47	d3	39	27	64	142	65	34	3138	3682	3322	4469	2469	2395	0.0124283	0.00733297	0.0192655	0.0317744	0.0263264	0.0141962
yes	XV	867150	867539	GTATG_CGGAG	+	47	u3	39	82	46	46	77	59	91271	93144	70464	85435	87605	79811	0.000427299	0.000880357	0.000652816	0.000538421	0.000878945	0.000739246
no	III	101606	101700	GTATG_TCAAG	-	28	d3	40	21	16	7	28	3	773	852	627	670	581	582	0.0517464	0.0246479	0.0255183	0.0104478	0.0481928	0.00515464
no	V	396771	397281	GTCAG_AATAG	+	40	u5	40	55	17	1	24	9	90045	83053	56064	75670	88482	72861	0.000444222	0.000662228	0.000303225	1.32e-05	0.000271242	0.000123523
yes	VII	556128	556307	GTGAG_AATAG	+	297	d5	40	67	33	32	2	21	112534	109285	64416	84537	96898	90449	0.000355448	0.000613076	0.000512295	0.000378532	2.06e-05	0.000232175
no	XI	158616	158973	GTATG_TTTAG	+	7	d3	42	51	14	23	16	29	13865	13513	9146	12407	16446	14506	0.00302921	0.00377414	0.00153072	0.00185379	0.000972881	0.00199917
no	XIV	494520	494973	GTACG_CTAAG	-	5	d3	42	12	12	15	23	4	61160	61436	37810	47303	55342	50874	0.000686723	0.000195325	0.000317376	0.000317105	0.000415598	7.86e-05
no	XVI	218647	218726	GTATG_TTGAG	+	20	u3	43	33	22	16	11	17	256	414	71	215	234	122	0.167969	0.0797101	0.309859	0.0744186	0.0470085	0.139344
yes	VII	543639	543788	GTATG_TGAAG	+	67	d3	44	12	13	53	8	25	2036	1835	1487	2018	1813	1557	0.021611	0.00653951	0.00874243	0.0262636	0.00441258	0.0160565
no	XI	618375	618526	GTTTG_TACAG	-	216	d5	45	163	49	70	102	88	52692	52167	27025	36506	43463	40327	0.00085402	0.00312458	0.00181314	0.00191749	0.00234682	0.00218216
yes	XII	242322	242690	GTATG_CCAAG	+	10	d3	45	66	13	8	36	50	57442	55229	31380	44585	46429	45048	0.000783399	0.00119502	0.000414277	0.000179433	0.000775377	0.00110993
no	IX	99096	99414	GTCTG_ACCAG	-	29	u5	45	11	44	1	12	1	44099	41131	26091	33414	37564	33226	0.00102043	0.000267438	0.0016864	2.99e-05	0.000319455	3.01e-05
yes	VII	920665	921129	GTATG_CCAAG	+	10	d3	45	40	92	80	30	37	40667	37970	27461	34205	38545	31141	0.00110655	0.00105346	0.00335021	0.00233884	0.000778311	0.00118814
yes	X	156770	157249	GTACG_CCAAG	-	20	d3	46	37	47	38	35	39	60947	64360	44729	64367	63863	56781	0.000754754	0.000574891	0.00105077	0.000590365	0.000548048	0.000686849
no	XIII	666923	667017	GTATG_AACAG	-	11	d3	46	9	14	29	1	9	250	354	406	345	202	264	0.184	0.0254237	0.0344828	0.084058	0.0049505	0.0340909
no	VII	62132	62183	GTATG_AAAAG	+	6	u3	46	45	138	195	76	104	331	475	959	1237	957	854	0.138973	0.0947368	0.1439	0.157639	0.0794148	0.12178
yes	II	60209	60697	GTATG_TTGAG	-	15	u3	48	51	44	6	3	14	60223	63235	38513	53180	54256	49498	0.000797038	0.000806515	0.00114247	0.000112824	5.53e-05	0.00028284
no	IV	399362	399495	GTATG_ATCAG	+	11	d3	48	42	75	83	53	37	3605	4229	3649	4761	3548	2739	0.0133148	0.00993143	0.0205536	0.0174333	0.014938	0.0135086
yes	XII	856989	857057	GTAAG_TTTAG	+	414	d5	50	82	29	63	317	261	15029	14455	8803	10283	11997	9830	0.0033269	0.00567278	0.00329433	0.00612662	0.0264233	0.0265514
yes	IV	579895	580017	GTATG_AACAG	+	416	d5	50	62	15	21	34	32	66200	68076	37537	54740	61248	58099	0.000755287	0.000910747	0.000399606	0.000383632	0.00055512	0.000550784
no	XVI	406955	407067	GTGTG_AACAG	+	308	d5	51	31	12	38	45	15	51116	48726	30337	44305	45252	41674	0.000997731	0.000636211	0.000395557	0.000857691	0.000994431	0.000359937
yes	II	592673	592768	GTATG_ATTAG	-	256	u3	52	121	25	50	13	15	66700	65744	41846	56804	64690	55861	0.00077961	0.00184047	0.000597429	0.00088022	0.000200958	0.000268524
no	II	604515	604930	GTACG_AGGAG	+	3	d3	53	46	2	37	19	23	131159	122988	76104	88896	123892	109649	0.00040409	0.00037402	2.63e-05	0.000416217	0.000153359	0.00020976
no	V	396811	397448	GTATG_TTGAG	+	167	d3	53	10	1	13	31	34	90045	83053	56064	75670	88482	72861	0.000588595	0.000120405	1.78e-05	0.000171799	0.000350354	0.000466642
no	VII	62132	62196	GTATG_TAAAG	+	7	d3	53	47	126	177	177	157	331	475	959	1237	957	854	0.160121	0.0989474	0.131387	0.143088	0.184953	0.183841
no	IV	715248	715354	GTATG_ATTAG	-	4	d5	54	118	99	122	56	87	5649	5590	3904	6048	4848	4443	0.00955921	0.0211091	0.0253586	0.020172	0.0115512	0.0195814
no	XIII	424998	425160	GTATG_ACAAG	+	7	d3	55	49	69	19	78	49	6774	5507	4750	5688	5135	5137	0.00811928	0.00889777	0.0145263	0.00334037	0.0151899	0.00953864
yes	XIII	551132	551203	GTATG_ACTAG	-	330	u3	56	56	9	4	1	1	29482	31375	14645	23049	26341	22843	0.00189946	0.00178486	0.000614544	0.000173543	3.8e-05	4.38e-05
no	V	396811	397285	GTATG_GTTAG	+	4	d3	57	108	4	34	45	17	90045	83053	56064	75670	88482	72861	0.000633017	0.00130037	7.13e-05	0.000449319	0.000508578	0.000233321
no	IV	1401797	1402184	GTTGG_CGTAG	+	4	u5	58	71	50	46	113	158	17782	19107	14092	20150	20430	20472	0.00326173	0.00371592	0.00354811	0.00228288	0.00553108	0.00771786
yes	XV	505938	506252	GTATG_ACAAG	+	86	u3	59	19	11	22	37	10	79165	78585	50159	70120	76822	67019	0.000745279	0.000241776	0.000219303	0.000313748	0.000481633	0.000149211
yes	XVI	794891	795394	GTAAG_AACAG	+	139	u5	63	9	9	1	24	24	87929	91587	57404	80409	81129	76658	0.000716487	9.83e-05	0.000156783	1.24e-05	0.000295825	0.000313079
no	IX	316772	317148	GTATG_TCGAG	+	23	u3	63	15	17	7	13	14	87686	81605	47876	63189	81933	65477	0.000718473	0.000183812	0.000355084	0.000110779	0.000158666	0.000213816
yes	II	142754	142846	GTATG_TCAAG	-	4	u3	65	88	62	130	85	64	1577	1895	1224	2231	1806	1455	0.0412175	0.046438	0.0506536	0.0582698	0.0470653	0.0439863
no	VI	221264	221414	GTATG_GGTAG	-	4	d3	65	48	35	80	43	19	29549	29097	15132	20575	24836	20909	0.00219974	0.00164966	0.00231298	0.00388821	0.00173136	0.0009087
no	XII	987142	987349	GTATG_CATAG	+	137	d3	67	112	157	153	69	15	520	324	393	496	347	358	0.128846	0.345679	0.399491	0.308468	0.198847	0.0418994
no	VIII	148117	148508	GTATG_TACAG	-	158	d5	68	127	24	13	16	8	98905	92046	54939	75984	91636	79214	0.000687528	0.00137974	0.000436848	0.000171089	0.000174604	0.000100992
no	II	366508	366584	GTATG_ATTAG	-	5	u3	70	37	52	56	9	7	463	624	467	723	324	349	0.151188	0.0592949	0.111349	0.077455	0.0277778	0.0200573
yes	XV	867398	867586	GTATG_TACAG	+	248	d5	72	38	6	48	14	57	91271	93144	70464	85435	87605	79811	0.00078886	0.00040797	8.51e-05	0.000561831	0.000159808	0.000714187
no	XII	327255	327399	GTATG_GTAAG	-	4	d3	73	58	122	93	75	59	1198	1367	1335	1779	1105	1056	0.0609349	0.0424287	0.0913858	0.0522766	0.0678733	0.0558712
no	VIII	251156	251258	GTATG_TGCAG	+	10	d3	77	78	99	92	74	56	1359	1383	957	1168	792	676	0.0566593	0.0563991	0.103448	0.0787671	0.0934343	0.0828402
no	VIII	148110	148666	GTATG_TTTAG	-	7	d3	79	74	38	29	85	100	98905	92046	54939	75984	91636	79214	0.000798746	0.000803946	0.000691676	0.000381659	0.000927583	0.0012624
no	X	435228	435316	GTATG_AATAG	+	27	u3	79	34	1	84	34	41	5756	5565	4559	6310	4793	3756	0.0137248	0.00610961	0.000219346	0.0133122	0.00709368	0.0109159
no	V	131777	131880	GTATG_CAAAG	+	19	u3	80	95	86	102	18	26	351	538	544	848	287	407	0.22792	0.17658	0.158088	0.120283	0.0627178	0.0638821
no	XIII	551952	552507	GTATG_GTAAG	+	12	d3	81	90	51	71	92	89	40959	44245	31902	44069	42500	41641	0.00197759	0.00203413	0.00159865	0.00161111	0.00216471	0.00213732
no	XI	82999	83081	GTATG_GATAG	+	7	d3	83	126	101	188	96	88	3085	3069	2844	4061	2665	2436	0.0269044	0.0410557	0.0355134	0.046294	0.0360225	0.0361248
yes	II	604515	604937	GTACG_CCAAG	+	10	d3	83	40	12	36	32	20	131159	122988	76104	88896	123892	109649	0.00063282	0.000325235	0.000157679	0.000404968	0.000258289	0.0001824
no	XI	437838	437913	GTATG_CAAAG	+	8	d3	88	67	49	79	21	68	1577	1379	1310	1626	1097	835	0.0558022	0.0485859	0.0374046	0.0485855	0.0191431	0.0814371
no	XVI	729354	729481	GTATG_TGTAG	-	32	d3	89	79	99	117	38	34	1666	1719	1314	2005	1244	1288	0.0534214	0.045957	0.0753425	0.0583541	0.0305466	0.0263975
yes	VII	72985	73137	GTACG_GAAAG	-	4	d3	90	107	60	134	64	121	4656	4581	4085	5560	4747	4028	0.0193299	0.0233573	0.0146879	0.0241007	0.0134822	0.0300397
yes	XV	92441	92521	GTAAT_TACAG	-	309	d5	93	118	5	51	56	44	40449	37976	23620	29550	28594	26895	0.00229919	0.00310723	0.000211685	0.00172589	0.00195845	0.00163599
yes	XI	551681	552043	GTATG_AACAG	+	41	d3	108	83	1	111	74	41	55579	56820	28831	39342	46825	44234	0.00194318	0.00146075	3.47e-05	0.00282141	0.00158035	0.000926889
no	XIII	551124	551203	GTATG_TGTAG	-	322	u3	110	88	61	40	17	17	29482	31375	14645	23049	26341	22843	0.00373109	0.00280478	0.00416524	0.00173543	0.000645382	0.00074421
no	XV	505938	505995	GTATG_AAAAG	+	343	u3	110	123	97	120	38	40	79165	78585	50159	70120	76822	67019	0.0013895	0.00156518	0.00193385	0.00171135	0.00049465	0.000596846
no	XVI	406647	407019	GTATG_AAAAG	+	48	u3	118	130	16	61	113	83	51116	48726	30337	44305	45252	41674	0.00230847	0.00266798	0.000527409	0.00137682	0.00249713	0.00199165
no	XVI	412262	412995	GTATG_AACAG	+	17	u3	118	53	64	64	65	52	0	0	0	0	0	0
no	XIII	551963	552495	GTTCT_TTTAG	+	11	d5	119	170	48	149	145	132	40959	44245	31902	44069	42500	41641	0.00290534	0.00384224	0.00150461	0.00338106	0.00341177	0.00316995
no	II	60190	60697	GTATG_GTTAG	-	4	d3	122	118	75	102	60	63	60223	63235	38513	53180	54256	49498	0.0020258	0.00186605	0.00194739	0.00191801	0.00110587	0.00127278
no	XI	155272	155629	GTATG_AAAAG	+	25	u3	125	65	94	136	38	40	558	647	451	551	432	381	0.224014	0.100464	0.208426	0.246824	0.087963	0.104987
yes	IX	47699	47764	GTAAG_GGTAG	+	4	d3	126	190	96	193	112	146	1286	1807	1172	1839	1418	1403	0.0979782	0.105147	0.0819113	0.104948	0.0789845	0.104063
yes	II	426517	426630	GTAAG_CTTAG	-	243	d5	130	45	196	171	79	100	2064	1798	2092	2557	1870	1538	0.0629845	0.0250278	0.0936902	0.0668752	0.042246	0.0650195
no	XIV	350958	351060	GTATG_ATCAG	+	7	d3	139	177	67	134	108	136	1883	2005	1774	2296	1578	1659	0.0738184	0.0882793	0.0377678	0.0583624	0.0684411	0.0819771
no	XIV	62362	62923	GTACG_TGCAG	-	11	d3	153	195	114	81	78	156	58664	58840	36043	46579	49512	45192	0.00260807	0.00331407	0.00316289	0.00173898	0.00157538	0.00345194
no	XII	744154	744239	GTACG_GTGAG	+	48	u3	157	195	137	282	171	79	269	508	456	685	335	356	0.583643	0.383858	0.300439	0.411679	0.510448	0.22191
yes	XVI	795030	795377	GTATG_AAAAG	+	17	u3	160	152	54	79	46	95	87929	91587	57404	80409	81129	76658	0.00181965	0.00165962	0.000940701	0.000982477	0.000566998	0.00123927
yes	VIII	505244	505516	GTATG_GAAAG	-	4	d3	163	157	72	65	121	85	66305	63727	38141	54069	55301	50773	0.00245834	0.00246363	0.00188773	0.00120217	0.00218803	0.00167412
yes	XII	263277	263594	GTACG_TATAG	+	71	d5	173	212	242	173	118	114	78910	79456	44457	57008	75683	64643	0.00219237	0.00266814	0.00544346	0.00303466	0.00155913	0.00176353
no	IX	317018	317171	GTATG_AACAG	+	246	d5	176	172	38	157	19	51	87686	81605	47876	63189	81933	65477	0.00200716	0.00210771	0.000793717	0.00248461	0.000231897	0.000778899
no	II	170621	170804	GTATG_CTCAG	+	56	u5	177	121	91	109	66	62	2858	3268	3154	5136	4088	4148	0.0619314	0.0370257	0.0288523	0.0212227	0.0161448	0.014947
yes	XVI	406726	407067	GTATG_AACAG	+	79	d5	182	171	4	23	83	21	51116	48726	30337	44305	45252	41674	0.00356053	0.00350942	0.000131852	0.000519129	0.00183417	0.000503911
no	I	150990	151096	GTATG_ATCAG	-	17	d3	193	124	290	265	152	191	457	652	488	639	351	316	0.422319	0.190184	0.594262	0.41471	0.433048	0.60443
no	IV	254956	255044	GTATG_AAAAG	-	19	d3	197	335	177	196	129	138	363	293	354	379	146	194	0.5427	1.14334	0.5	0.51715	0.883562	0.71134
yes	XIII	23361	23654	GTATG_AACAG	-	4	d5	204	138	125	100	175	132	7457	6819	5165	5915	5173	3716	0.0273568	0.0202376	0.0242014	0.0169062	0.0338295	0.0355221
yes	III	111580	111633	GTATG_GGGAG	-	22	u3	206	215	55	182	133	161	559	619	179	293	386	348	0.368515	0.347334	0.307263	0.62116	0.34456	0.462644
no	IV	1359970	1360373	GTATG_ATAAG	+	31	u3	208	196	134	127	151	211	59617	64249	40082	58462	53504	54649	0.00348894	0.00305063	0.00334315	0.00217235	0.00282222	0.003861
no	VI	64600	64856	GTTTG_AACAG	-	64	d5	215	246	247	642	533	410	1602	1292	2107	2524	2857	2491	0.134207	0.190402	0.117228	0.254358	0.186559	0.164593
no	XVI	138726	138868	GTATG_GTCAG	+	4	d3	220	178	197	101	174	119	13573	13194	12708	16664	13979	11454	0.0162087	0.013491	0.015502	0.00606097	0.0124472	0.0103894
yes	II	170677	170757	GTATG_AAAAG	+	47	u3	231	518	282	473	221	208	2858	3268	3154	5136	4088	4148	0.0808258	0.158507	0.0894103	0.092095	0.0540607	0.0501446
no	XI	155272	155636	GTATG_CGAAG	+	18	u3	232	310	189	430	221	179	558	647	451	551	432	381	0.415771	0.479134	0.419069	0.780399	0.511574	0.469816
yes	XVI	218647	218721	GTATG_TAAAG	+	25	u3	268	149	100	105	170	146	256	414	71	215	234	122	1.04688	0.359903	1.40845	0.488372	0.726496	1.19672
yes	XII	522891	523028	GTATG_AATAG	+	221	d5	270	181	43	8	14	8	45046	40308	30736	36843	41806	39507	0.00599387	0.00449042	0.00139901	0.000217138	0.00033488	0.000202496
yes	XII	263328	263594	GTACG_TATAG	+	122	d5	298	342	276	481	276	305	78910	79456	44457	57008	75683	64643	0.00377645	0.00430427	0.00620825	0.00843741	0.00364679	0.00471822
no	IV	1355232	1355550	GTACG_GGTAG	-	5	d3	313	295	242	77	259	170	34043	38427	21803	27738	28535	24121	0.00919425	0.00767689	0.0110994	0.00277597	0.00907657	0.0070478
yes	IX	99131	99385	GTACG_ATGAG	-	35	u3	428	482	252	245	498	264	44099	41131	26091	33414	37564	33226	0.00970544	0.0117187	0.0096585	0.00733226	0.0132574	0.00794558
no	XIII	424998	425124	GTATG_ACAAG	+	29	u3	554	630	356	463	424	416	6774	5507	4750	5688	5135	5137	0.0817833	0.1144	0.0749474	0.0813994	0.0825706	0.0809811
no	VII	439098	439323	GTATA_AACAG	+	4	d5	609	419	342	570	652	474	140295	127995	77551	102162	143383	109380	0.00434085	0.00327356	0.00441	0.00557937	0.00454726	0.00433352
yes	VII	555831	556109	GTATG_TTTAG	+	198	u3	614	756	315	349	71	119	112534	109285	64416	84537	96898	90449	0.00545613	0.00691769	0.00489009	0.00412837	0.000732729	0.00131566
no	V	269784	270148	GTATG_GAAAG	-	32	u3	1293	1105	934	981	882	770	68599	54772	49454	53360	68033	54247	0.0188487	0.0201745	0.0188862	0.0183846	0.0129643	0.0141943
no	XIV	144848	145254	GTATG_ATCAG	-	302	d3	1	18	18	23	2	30	302	358	497	652	298	412	0.00331126	0.0502793	0.0362173	0.0352761	0.00671141	0.0728155
no	II	679928	680039	GTATG_GACAG	-	15	d3	1	2	12	9	6	1	1458	1527	1333	1602	1235	1177	0.000685871	0.00130976	0.00900225	0.00561798	0.0048583	0.000849618
no	II	110267	110505	GTAAG_AGTAG	-	154	d3	1	1	12	14	1	1	908	1075	1863	2111	821	916	0.00110132	0.000930233	0.00644122	0.00663193	0.00121803	0.0010917
yes	II	142775	142846	GTATG_GAAAG	-	25	u3	1	1	5	11	1	23	1577	1895	1224	2231	1806	1455	0.000634115	0.000527704	0.00408497	0.00493052	0.00055371	0.0158076
yes	IV	1401792	1402184	GTAAA_CGTAG	+	9	u5	1	20	10	12	1	12	17782	19107	14092	20150	20430	20472	5.62e-05	0.00104674	0.000709622	0.000595533	4.89e-05	0.000586166
no	V	396884	397281	GTATA_AATAG	+	73	d5	1	1	7	7	1	1	90045	83053	56064	75670	88482	72861	1.11e-05	1.2e-05	0.000124857	9.25e-05	1.13e-05	1.37e-05
yes	VIII	126552	127343	GTACG_TTTAG	+	231	d3	1	1	13	11	1	8	68361	72517	46325	61392	70447	65955	1.46e-05	1.38e-05	0.000280626	0.000179176	1.42e-05	0.000121295
yes	IX	231958	232353	GTACT_TATAG	-	13	d5	1	2	7	14	11	1	31964	31823	16518	22851	27048	24317	3.13e-05	6.28e-05	0.00042378	0.000612665	0.000406684	4.11e-05
no	XIII	732470	732875	GTTTG_AATAG	+	4	d5	2	5	5	7	12	9	76354	73297	54953	65269	64975	57075	2.62e-05	6.82e-05	9.1e-05	0.000107248	0.000184686	0.000157687
no	XV	93662	94290	GTATG_CAAAG	-	182	d3	2	1	12	13	1	1	96309	96105	53462	80130	89161	79876	2.08e-05	1.04e-05	0.000224458	0.000162236	1.12e-05	1.25e-05
yes	XVI	412257	413012	GTATG_GATAG	+	5	u5	2	1	9	8	1	2	0	0	0	0	0	0
no	IX	317047	317171	GTATC_AACAG	+	275	d5	3	26	18	9	1	3	87686	81605	47876	63189	81933	65477	3.42e-05	0.000318608	0.000375971	0.00014243	1.22e-05	4.58e-05
no	VII	62132	62214	GTATG_CTTAG	+	25	d3	3	1	29	40	37	11	331	475	959	1237	957	854	0.00906344	0.00210526	0.0302398	0.0323363	0.0386625	0.0128806
yes	XII	40233	40400	GTATG_TGAAG	-	11	u3	4	11	12	24	19	19	18883	18758	16308	23956	17916	16091	0.000211831	0.000586416	0.000735835	0.00100184	0.0010605	0.00118078
no	XV	240935	241025	GTAAG_TGAAG	-	13	d3	4	26	19	8	1	16	316	366	315	466	321	275	0.0126582	0.0710383	0.0603175	0.0171674	0.00311526	0.0581818
yes	XVI	76155	76223	GTATG_AACAG	-	169	u3	4	8	10	8	1	1	90817	82256	53861	67368	78826	63252	4.4e-05	9.73e-05	0.000185663	0.000118751	1.27e-05	1.58e-05
no	XI	109578	109890	GTATG_TAAAG	+	7	d3	5	35	10	13	9	2	39004	34993	25653	30864	33183	28943	0.000128192	0.0010002	0.000389818	0.000421203	0.000271223	6.91e-05
yes	XI	551681	552022	GTATG_CCAAG	+	20	d3	9	5	26	22	4	9	55579	56820	28831	39342	46825	44234	0.000161932	8.8e-05	0.000901807	0.000559199	8.54e-05	0.000203463
yes	VII	62100	62189	GTAAG_AATAG	+	32	u5	9	4	14	17	7	6	331	475	959	1237	957	854	0.0271903	0.00842105	0.0145985	0.0137429	0.00731452	0.00702576
no	IV	1266770	1266845	GTTGT_CTTAG	-	16	d5	11	2	8	18	1	12	1279	1724	1620	2122	1308	1101	0.00860047	0.00116009	0.00493827	0.00848256	0.000764526	0.0108992
no	XII	987142	987233	GTATG_ATAAG	+	21	d3	11	1	5	15	1	5	520	324	393	496	347	358	0.0211538	0.00308642	0.0127226	0.0302419	0.00288184	0.0139665
no	X	50269	50435	GTACG_TGCAG	-	24	u5	15	4	15	13	22	1	1133	1004	1141	1555	950	850	0.0132392	0.00398406	0.0131464	0.00836013	0.0231579	0.00117647
no	VIII	126552	127332	GTACG_ACCAG	+	220	d3	17	1	9	26	1	1	68361	72517	46325	61392	70447	65955	0.00024868	1.38e-05	0.00019428	0.000423508	1.42e-05	1.52e-05
no	XIV	331453	331837	GTATA_TTTAG	+	127	d5	18	1	35	51	27	52	48347	46447	27251	37469	42184	37808	0.000372309	2.15e-05	0.00128436	0.00136112	0.000640053	0.00137537
no	IX	316847	317171	GTACA_AACAG	+	75	d5	41	4	7	9	43	8	87686	81605	47876	63189	81933	65477	0.000467577	4.9e-05	0.000146211	0.00014243	0.000524819	0.00012218
yes	XII	242322	243419	GTATG_GACAG	+	739	d3	1	1	8	2	7	8	57442	55229	31380	44585	46429	45048	1.74e-05	1.81e-05	0.000254939	4.49e-05	0.000150768	0.000177588
yes	II	170677	170844	GTATG_ATCAG	+	40	d3	1	6	10	4	11	17	2858	3268	3154	5136	4088	4148	0.000349895	0.00183599	0.00317058	0.000778816	0.0026908	0.00409836
no	XIII	140091	140188	GTTTC_TACAG	-	5	u5	1	1	3	1	9	8	2426	2131	1609	1794	1633	1437	0.000412201	0.000469263	0.00186451	0.000557414	0.00551133	0.00556715
no	XIII	552063	552495	GTACG_TTTAG	+	111	d5	1	24	1	12	13	19	40959	44245	31902	44069	42500	41641	2.44e-05	0.000542434	3.13e-05	0.0002723	0.000305882	0.000456281
no	XIII	732466	732911	GTATG_CCAAG	+	36	d3	1	1	15	1	16	14	76354	73297	54953	65269	64975	57075	1.31e-05	1.36e-05	0.000272961	1.53e-05	0.000246249	0.000245291
no	XIV	144855	145254	GTATG_CGAAG	-	295	d3	1	4	2	1	25	12	302	358	497	652	298	412	0.00331126	0.0111732	0.00402414	0.00153374	0.0838926	0.0291262
no	II	604519	604927	GTATT_TTTAG	+	4	d5	1	4	1	1	10	13	131159	122988	76104	88896	123892	109649	7.62e-06	3.25e-05	1.31e-05	1.12e-05	8.07e-05	0.00011856
no	II	653369	653490	GTATG_AACAG	+	38	d3	1	1	1	1	6	18	365	314	288	374	263	221	0.00273973	0.00318471	0.00347222	0.0026738	0.0228137	0.081448
no	II	653369	653558	GTATG_AACAG	+	106	d3	1	9	3	5	11	8	365	314	288	374	263	221	0.00273973	0.0286624	0.0104167	0.013369	0.0418251	0.0361991
yes	IV	1103810	1103881	GTATG_AGTAG	+	11	u3	1	5	3	20	10	5	710	760	583	872	608	532	0.00140845	0.00657895	0.0051458	0.0229358	0.0164474	0.0093985
yes	VI	64588	64920	GTACG_GAAAG	-	12	d3	1	8	33	1	28	12	1602	1292	2107	2524	2857	2491	0.00062422	0.00619195	0.0156621	0.000396197	0.00980049	0.00481734
no	VII	73026	73137	GTACG_TATAG	-	37	u3	1	5	1	20	9	24	4656	4581	4085	5560	4747	4028	0.000214777	0.00109147	0.000244798	0.00359712	0.00189593	0.00595829
no	VIII	126552	126829	GTACG_GGCAG	+	283	u3	1	3	1	1	16	8	68361	72517	46325	61392	70447	65955	1.46e-05	4.14e-05	2.16e-05	1.63e-05	0.000227121	0.000121295
no	IV	217817	218007	GTTTG_AATAG	+	214	d5	2	1	1	1	19	8	32853	32341	18850	23985	28252	24209	6.09e-05	3.09e-05	5.31e-05	4.17e-05	0.000672519	0.000330456
no	VIII	126556	127112	GTATC_CACAG	+	4	d5	3	11	31	4	17	8	68361	72517	46325	61392	70447	65955	4.39e-05	0.000151689	0.000669185	6.52e-05	0.000241316	0.000121295
yes	XII	712726	713247	GTATG_TTTAG	-	92	u5	3	3	1	6	20	7	92830	88811	67124	75839	82296	67323	3.23e-05	3.38e-05	1.49e-05	7.91e-05	0.000243025	0.000103976
no	XV	93844	94319	GTTAG_TTTAG	-	29	u5	3	16	1	7	7	14	96309	96105	53462	80130	89161	79876	3.11e-05	0.000166485	1.87e-05	8.74e-05	7.85e-05	0.000175272
yes	X	50322	50411	GTATG_CGAAG	-	53	u3	7	1	20	1	17	14	1133	1004	1141	1555	950	850	0.00617829	0.000996016	0.0175285	0.000643087	0.0178947	0.0164706
no	XV	867150	867745	GTATG_TGAAG	+	159	d3	7	5	9	4	8	5	91271	93144	70464	85435	87605	79811	7.67e-05	5.37e-05	0.000127725	4.68e-05	9.13e-05	6.26e-05
no	VII	311400	311526	GTTGT_TACAG	+	384	d5	7	3	46	3	19	23	115770	118246	75855	106945	102828	102990	6.05e-05	2.54e-05	0.00060642	2.81e-05	0.000184775	0.000223323
yes	X	91095	91424	GTATG_TCTAG	+	13	d3	8	1	8	1	35	8	19717	19739	20215	24140	23767	20940	0.000405741	5.07e-05	0.000395746	4.14e-05	0.00147263	0.000382044
yes	VI	203285	203386	GTATG_AGCAG	-	8	d3	8	1	7	4	7	12	3230	2755	2852	3082	2535	2292	0.00247678	0.000362976	0.00245442	0.00129786	0.00276134	0.0052356
no	XIV	557575	557684	GTACG_TGCAG	+	36	u5	10	1	2	2	16	5	314	577	496	834	610	447	0.0318471	0.0017331	0.00403226	0.00239808	0.0262295	0.0111857
no	XVI	406647	407079	GTATG_TACAG	+	12	d3	13	1	1	10	8	12	51116	48726	30337	44305	45252	41674	0.000254323	2.05e-05	3.3e-05	0.000225708	0.000176788	0.000287949
yes	IV	1073339	1073401	GTATG_TGGAG	-	26	u3	17	5	1	22	20	18	480	470	494	601	377	385	0.0354167	0.0106383	0.00202429	0.0366057	0.0530504	0.0467532
yes	IX	231958	232392	GTACC_TATAG	-	26	u5	17	3	1	6	15	7	31964	31823	16518	22851	27048	24317	0.000531848	9.43e-05	6.05e-05	0.000262571	0.00055457	0.000287864
yes	XVI	282141	282677	GTATG_CAAAG	+	12	d3	19	1	1	1	23	8	117086	109754	67363	80967	105125	82538	0.000162274	9.11e-06	1.48e-05	1.24e-05	0.000218787	9.69e-05
no	IX	316772	317175	GTATG_GGTAG	+	4	d3	20	1	1	1	15	7	87686	81605	47876	63189	81933	65477	0.000228087	1.23e-05	2.09e-05	1.58e-05	0.000183076	0.000106908

## Sheet: New_introns
gene	in_frame	chromosome	start	end	5'SS_3'SS	strand	intron_length	event	Novel_reads_FAST_A	Novel_reads_FAST_B	Novel_reads_SLOW_A	Novel_reads_SLOW_B	Novel_reads_WT_A	Novel_reads_WT_B	SEF_FAST_A	SEF_FAST_B	SEF_SLOW_A	SEF_SLOW_B	SEF_WT_A	SEF_WT_B
CIK1	no	XIII	659668	659879	GTATA_ACAAG	+	211	newintron	6	9	10	1	4	1	0.00683867	0.00842041	0.00667421	0.000593328	0.00674734	0.00131821
TAF11	no	XIII	242927	243056	GTAAG_CCAAG	-	129	newintron	6	11	10	1	1	1	0.00380696	0.00673093	0.00750936	0.000713947	0.000995861	0.00102557
ADH1	no	XV	159650	160167	GTACC_TCAAG	-	517	newintron	6	6	1	1	1	16	1.71e-05	1.72e-05	3.04e-06	2.2e-06	3.35e-06	5.76e-05
SUA5	no	VII	186057	187215	GTATG_TTAAG	+	1158	newintron	6	13	1	19	2	2	0.00189663	0.0036295	0.000430108	0.00647777	0.000829132	0.000914992
WSS1	yes	VIII	372188	372292	GTTTG_GATAG	+	104	newintron	7	21	10	18	31	14	0.000967082	0.00309498	0.00159417	0.00221211	0.00465172	0.00221268
PDC1	yes	XII	233577	234002	GTGAC_GCCAG	-	425	newintron	7	6	5	12	8	4	1.11e-05	9.77e-06	9.44e-06	1.6e-05	1.2e-05	6.36e-06
YPL250W-A	yes	XVI	75715	75903	GCAGC_TGGAG	+	188	newintron	7	7	3	4	6	2	0.289545	0.15925	0.0853125	0.26	0.0580851	0.0535294
RPL27A	no	VIII	127197	127237	GTCAC_TGAAG	+	40	newintron_introncontaining	7	14	1	1	1	11	6.21e-05	0.000117475	1.3e-05	1e-05	8.86e-06	0.000102604
PDC1	yes	XII	233958	234002	GTGAC_TGAAG	-	44	newintron	7	10	1	1	1	5	1.11e-05	1.63e-05	1.89e-06	1.33e-06	1.5e-06	7.95e-06
SIP2	no	VII	97441	97537	GCTGC_TCAAG	+	96	newintron	7	11	5	3	2	1	0.00427816	0.00773844	0.00444761	0.00198937	0.0016124	0.000843243
FLO5	yes	VIII	526946	527215	GTTAC_CTGAG	+	269	newintron	8	18	11	9	6	7	0.00348832	0.00732711	0.00495783	0.00288243	0.00258034	0.00306636
RPS4A	yes	X	702191	702442	GTAAG_TTTAG	-	251	newintron_introncontaining	8	27	1	9	11	23	5.33e-05	0.000185708	9.68e-06	6.45e-05	7.24e-05	0.000166744
UBI4	yes	XII	64399	64854	GTTGA_CAGAG	-	455	newintron	8	6	7	6	3	9	0.000394353	0.000285348	0.00033713	0.000205346	0.000263979	0.000828228
NOP1	yes	IV	427389	427430	GTGGT_TAGAG	+	41	newintron	8	6	11	6	1	15	0.000436564	0.000324033	0.0010853	0.000381293	5.76e-05	0.000946705
RPS4A	no	X	702119	702140	GTCTT_ACAAG	-	21	newintron_introncontaining	8	7	4	16	1	1	5.33e-05	4.81e-05	3.87e-05	0.00011471	6.58e-06	7.25e-06
BEM3	no	XVI	335480	335751	GTATG_GACAG	-	271	newintron	8	11	1	24	1	8	0.00349445	0.00387488	0.000436469	0.0077795	0.000402018	0.0032697
TVP15	yes	IV	655204	655272	GTATG_ATCAG	+	68	newintron	8	13	26	15	3	16	0.000958258	0.00169532	0.00402345	0.00172534	0.00051846	0.00285792
YDR210W	yes	IV	871120	871149	GTTAT_ACAAG	+	29	newintron	8	13	9	9	9	7	0.000336894	0.000522359	0.000539557	0.000354757	0.000418605	0.000348773
TDH3	yes	VII	883037	883462	GTTGT_AGAAG	-	425	newintron	8	6	3	7	7	5	5.48e-06	4.32e-06	2.81e-06	4.83e-06	5.42e-06	4.33e-06
UBI4	yes	XII	64421	64648	GTATT_AGAAG	-	227	newintron	9	8	25	15	6	9	0.000443647	0.000380464	0.00120404	0.000513365	0.000527957	0.000828228
DCR2	no	XII	848797	849095	GTACC_TAAAG	-	298	newintron	9	11	21	1	1	1	0.00294389	0.00333201	0.00859962	0.000286112	0.000361364	0.000337645
CDC21	no	XV	467399	467489	GTACG_ACTAG	-	90	newintron	9	16	28	1	1	1	0.0026546	0.00405424	0.00684556	0.000198005	0.000303407	0.000317879
SUA5	yes	VII	186057	187208	GTATG_TGCAG	+	1151	newintron	9	30	1	16	23	9	0.00284494	0.00837578	0.000430108	0.00545496	0.00953501	0.00411746
FLO1	yes	I	206383	206517	GTCTA_TGAAG	+	134	newintron	9	39	15	23	49	3	0.0191541	0.0699635	0.0924032	0.0910918	0.211295	0.015211
VMA4	no	XV	943806	943896	GTAAG_GATAG	+	90	newintron	10	40	14	3	11	12	0.000178339	0.000761886	0.000295791	4.97e-05	0.000239364	0.000296766
SYN8	yes	I	128522	129034	GTAAG_AGCAG	-	512	newintron	10	9	1	1	1	1	0.00166201	0.00153995	0.000230214	0.000202082	0.000193962	0.0002618
OSH2	yes	IV	417222	417626	GTATG_TATAG	-	404	newintron	10	10	35	21	40	70	0.00343474	0.00334135	0.0109549	0.00498979	0.0182759	0.0324599
SSA1	yes	I	139559	139606	GTGGT_CCCAG	-	47	newintron	10	7	8	10	12	8	8.6e-05	6e-05	7.26e-05	6.48e-05	8.79e-05	6.46e-05
UBI4	yes	XII	64649	65104	GTATC_GGAAG	-	455	newintron	11	24	10	26	8	6	0.000542236	0.00114139	0.000481615	0.000889832	0.000703943	0.000552152
RPL19B	yes	II	168870	169052	GTTTG_GAAAG	+	182	newintron_introncontaining	11	10	1	11	7	8	7.43e-05	7.09e-05	9.49e-06	7.92e-05	4.62e-05	5.76e-05
SSA2	yes	XII	95622	95660	GTGGT_CCCAG	-	38	newintron	11	6	7	8	11	4	4.49e-05	2.43e-05	3.87e-05	3.1e-05	4.17e-05	1.66e-05
SSA2	yes	XII	96162	96695	GTGAA_TGAAG	-	533	newintron	11	23	6	7	6	13	4.49e-05	9.32e-05	3.31e-05	2.71e-05	2.28e-05	5.38e-05
RPS1B	yes	XIII	147124	147210	GTTAA_AGAAG	+	86	newintron	11	27	8	23	15	25	4.59e-05	0.000110055	4.69e-05	9.82e-05	6.39e-05	0.000107846
RPS16B	no	IV	306806	307073	GTACG_TTTAG	-	267	newintron_introncontaining	11	20	41	27	1	7	9.14e-05	0.000168346	0.000532949	0.000267914	7.96e-06	6.29e-05
VOA1	no	VII	699231	699769	GTATG_TGAAG	-	538	newintron	11	6	5	1	1	1	0.000594595	0.000329707	0.000399309	5.68e-05	5.99e-05	6.37e-05
YHR056W-A	no	VIII	217286	217449	GTATG_AGCAG	+	163	newintron	11	6	4	8	1	1	0.0613462	0.0466071	0.0355102	0.087	0.0058	0.00690476
APN1	no	XI	223741	223801	GTAAT_AGGAG	-	60	newintron	11	15	1	1	1	1	0.00586632	0.00611372	0.000356039	0.000263723	0.000474171	0.000464036
PDC1	yes	XII	233643	234062	GTAAA_CCCAG	-	419	newintron	12	9	1	2	1	1	1.9e-05	1.47e-05	1.89e-06	2.67e-06	1.5e-06	1.59e-06
SSA1	yes	I	140108	140641	GTGAA_TGAAG	-	533	newintron	12	7	5	16	3	7	0.000103176	6e-05	4.54e-05	0.000103722	2.2e-05	5.66e-05
YGL188C-A	no	VII	148599	148897	GTAAT_ATTAG	-	298	newintron	12	10	5	16	16	6	0.00130354	0.000931923	0.000707831	0.00163953	0.00136976	0.000601279
SBA1	yes	XI	220778	220831	GTGCT_GGGAG	+	53	newintron	13	18	15	16	13	22	0.000532861	0.000672469	0.000613041	0.000483849	0.000512981	0.000928003
PUS7	no	XV	791685	792015	GTAAG_GCAAG	-	330	newintron	13	41	17	32	6	9	0.00278877	0.00701435	0.00395825	0.00540458	0.00137132	0.00219965
COG4	no	XVI	739739	739796	GTAAG_TTTAG	-	57	newintron	13	12	1	2	3	1	0.0067251	0.00494328	0.000382423	0.000589504	0.00153009	0.000463235
TIF3	yes	XVI	869029	869184	GTTGA_AAGAG	-	155	newintron	13	14	12	14	16	8	0.000598925	0.00067406	0.0006834	0.000597328	0.000755898	0.00040952
PRP5	no	II	691967	692130	GTATG_GTAAG	+	163	newintron	13	9	1	24	7	1	0.00438387	0.00246906	0.000319712	0.00543875	0.00291484	0.000423972
YEL023C	yes	V	110545	110820	GTATG_GATAG	-	275	newintron	13	46	25	45	1	21	0.0180626	0.0469183	0.021397	0.0282935	0.00129942	0.0239646
RPS4A	yes	X	702219	702395	GTTAC_ACAAG	-	176	newintron_introncontaining	13	11	1	1	1	8	8.67e-05	7.57e-05	9.68e-06	7.17e-06	6.58e-06	5.8e-05
PRP31	yes	VII	667572	667796	GTATG_AGAAG	+	224	newintron	13	6	1	8	7	1	0.0135683	0.0056045	0.00111303	0.0059412	0.00609745	0.000851074
FLO1	yes	I	206113	206247	GTCTA_TGAAG	+	134	newintron	13	6	1	2	1	2	0.027667	0.0107636	0.00616021	0.00792103	0.00431215	0.0101407
RPL5	yes	XVI	303550	303930	GTCTT_CCAAG	+	380	newintron	14	6	2	9	17	14	6.65e-05	3.05e-05	1.53e-05	5.34e-05	8.78e-05	8.45e-05
ADH6	yes	XIII	911566	911640	GTACT_GGCAG	-	74	newintron	14	14	1	1	1	1	0.000493089	0.000540446	5.24e-05	3.63e-05	4.44e-05	4.87e-05
NRD1	no	XIV	174508	174593	GTCAG_TCAAG	-	85	newintron	14	8	1	1	1	1	0.00290048	0.00176987	0.000306558	0.000247661	0.000272971	0.00031105
ASR1	no	XVI	720145	720616	GTATG_TACAG	-	471	newintron	14	6	1	1	1	2	0.0247417	0.0141523	0.00166008	0.00130488	0.00208688	0.00374841
YLR072W	no	XII	278845	279329	GTACG_TCCAG	+	484	newintron	15	22	1	1	1	1	0.0100532	0.0123895	0.000716678	0.00059247	0.000655436	0.000761024
SSA1	yes	I	139559	139582	GTGGT_CCCAG	-	23	newintron	15	7	16	7	7	14	0.00012897	6e-05	0.000145177	4.54e-05	5.13e-05	0.000113116
BRP1	no	VII	482847	483129	GTTGA_CAGAG	+	282	newintron	15	13	13	17	8	22	0.0263571	0.0209476	0.103161	0.0774444	0.0541651	0.21648
BLM10	no	VI	123405	123550	GTATT_TGAAG	+	145	newintron	16	35	39	22	1	1	0.00390625	0.00718035	0.0103653	0.00411537	0.000363452	0.000361725
SUA5	yes	VII	186057	187220	GTATG_AAAAG	+	1163	newintron	16	10	20	6	1	1	0.00505767	0.00279193	0.00860215	0.00204561	0.000414566	0.000457496
LIA1	no	X	570568	570640	GTAGT_CCAAG	-	72	newintron	17	35	3	12	30	8	0.00166992	0.00376292	0.000486385	0.00152941	0.00344447	0.00103004
UBI4	yes	XII	64476	64703	GTTGA_TAGAG	-	227	newintron	17	30	17	20	12	6	0.000838	0.00142674	0.000818745	0.000684486	0.00105591	0.000552152
NOP1	yes	IV	427467	427574	GTGGC_CAGAG	+	107	newintron	17	15	14	10	13	18	0.000927699	0.000810082	0.00138129	0.000635488	0.000749223	0.00113605
RPL3	yes	XV	444957	445496	GTTAC_AAGAG	+	539	newintron	18	29	1	10	15	20	5.77e-05	9.29e-05	4.97e-06	3.49e-05	4.9e-05	7.03e-05
YMC1	no	XVI	673749	674376	GTATG_AAAAG	+	627	newintron	18	13	5	25	13	1	0.00290999	0.00229435	0.0011236	0.0041052	0.00266505	0.000210451
YCL021W-A	no	III	83597	84119	GTACG_ACTAG	+	522	newintron	19	8	6	1	1	2	0.020902	0.00823415	0.00464417	0.000510155	0.00121264	0.0016382
CRH1	no	VII	878161	878395	GTATG_CTCAG	-	234	newintron	19	13	1	3	1	7	0.00133848	0.000994864	0.000127067	0.000284507	0.00010871	0.000796735
MNE1	yes	XV	993517	994161	GTATG_TATAG	-	644	newintron	19	10	1	1	1	1	0.00999079	0.00412355	0.000603463	0.000391918	0.000626829	0.000580463
FLO5	yes	VIII	526676	526810	GTTAC_CTGAG	+	134	newintron	20	15	17	35	14	21	0.00872079	0.00610593	0.00766211	0.0112094	0.00602078	0.00919908
YNL208W	yes	XIV	254887	254934	GTGGC_GCCAG	+	47	newintron	20	25	18	34	19	12	0.000885642	0.00124766	0.00095732	0.0014217	0.00100756	0.000838135
SPF1	no	V	93661	93839	GTATG_TCAAG	+	178	newintron	20	10	1	1	1	1	0.00173998	0.000857847	9.28e-05	6.99e-05	7.5e-05	8.04e-05
LDB16	yes	III	108111	108593	GTATG_TTCAG	+	482	newintron	20	8	19	13	23	5	0.0120722	0.00443088	0.0139078	0.0078694	0.0152852	0.00459147
UBI4	yes	XII	64193	64420	GTATC_GGAAG	-	227	newintron	21	21	18	24	5	9	0.00103518	0.000998718	0.000866907	0.000821383	0.000439964	0.000828228
PRP5	no	II	691967	692156	GTATG_GAAAG	+	189	newintron	21	17	19	14	3	11	0.00708164	0.00466378	0.00607452	0.0031726	0.00124922	0.00466369
YEL023C	no	V	110553	110820	GTATG_ATTAG	-	267	newintron	21	75	63	46	24	58	0.029178	0.0764972	0.0539204	0.0289222	0.0311862	0.0661879
NTH1	no	IV	451412	451490	GTATG_TGTAG	-	78	newintron	22	27	1	45	2	22	0.00342199	0.00426181	0.000159008	0.00543325	0.000427777	0.00491803
YDR336W	no	IV	1145112	1145176	GTACG_GCTAG	+	64	newintron	22	38	20	35	21	20	0.013448	0.0208115	0.00900823	0.0102253	0.0092825	0.00895374
UBI4	yes	XII	64932	65159	GTTGA_TAGAG	-	227	newintron	23	19	14	17	5	4	0.00113376	0.000903602	0.000674261	0.000581813	0.000439964	0.000368101
AGC1	no	XVI	602268	602341	GTATG_GACAG	-	73	newintron	24	10	26	77	8	16	0.0164563	0.00504098	0.0116781	0.0244267	0.0048009	0.00950195
SLP1	no	XV	624768	626320	GTAAG_GAAAG	+	1552	newintron	25	24	1	6	32	1	0.0168261	0.0137557	0.000639946	0.00293739	0.0176385	0.000644942
AIM45	yes	XVI	564489	564569	GTAAC_TGCAG	-	80	newintron	25	8	2	1	1	1	0.00272139	0.000963241	0.000313145	0.000122114	0.000180721	0.000189669
RPL27A	yes	VIII	127148	127264	GTTGT_AGAAG	+	116	newintron_introncontaining	26	40	2	57	45	92	0.000230536	0.000335642	2.6e-05	0.000572314	0.000398756	0.000858141
RPS4A	yes	X	702438	702500	GTCAA_GTAAG	-	62	newintron_introncontaining	27	19	1	1	16	3	0.000179979	0.000130683	9.68e-06	7.17e-06	0.00010535	2.17e-05
TIF3	yes	XVI	869157	869234	GTTCC_AAGAG	-	77	newintron	32	34	27	27	48	26	0.00147428	0.001637	0.00153765	0.00115199	0.0022677	0.00133094
YJL193W	no	X	71427	71515	GTTGG_TTCAG	+	88	newintron	33	7	11	25	47	1	0.0226559	0.00432669	0.00742546	0.0146937	0.0271491	0.000624483
UBI4	yes	XII	64301	64528	GTGGT_GAGAG	-	227	newintron	33	26	25	48	13	16	0.00162671	0.00123651	0.00120404	0.00164277	0.00114391	0.0014724
SNC1	no	I	87386	87446	GTAGA_TACAG	-	60	newintron	33	11	1	1	13	9	0.00321895	0.00122685	0.000134325	0.000100937	0.0014528	0.00110188
HSE1	no	VIII	103618	103856	GTAAG_TTGAG	-	238	newintron	33	32	30	33	4	17	0.00847396	0.00857252	0.0113116	0.00938834	0.00166123	0.00751975
UBI4	yes	XII	64248	64475	GTTGA_TAGAG	-	227	newintron	34	45	39	43	16	27	0.001676	0.00214011	0.0018783	0.00147164	0.00140789	0.00248468
PDC1	no	XII	233630	233885	GTATG_GACAG	-	255	newintron	35	17	16	35	56	13	5.54e-05	2.77e-05	3.02e-05	4.67e-05	8.37e-05	2.07e-05
NOP1	yes	IV	427413	427520	GTGGC_CAGAG	+	107	newintron	35	32	14	61	37	22	0.00190997	0.00172817	0.00138129	0.00387648	0.0021324	0.0013885
PDX3	no	II	306820	306902	GTATC_CGAAG	-	82	newintron	36	28	56	80	65	79	0.00376985	0.00318065	0.00698217	0.0075053	0.00790299	0.0104124
YNL190W	yes	XIV	282745	282804	GTCTT_TGGAG	-	59	newintron	36	22	47	43	53	46	0.00331003	0.00227996	0.00286024	0.00216014	0.00304958	0.00278199
SSA1	yes	I	139571	139594	GTGGC_TCCAG	-	23	newintron	36	42	36	41	42	51	0.000309529	0.00036015	0.000326648	0.000265788	0.000307551	0.000412066
TEL12L	no	XII	4919	5123	GTACG_CTTAG	-	204	newintron	37	51	22	44	27	6	inf	inf	inf	inf	inf	inf
TEL12L	no	XII	10454	10658	GTACG_CTTAG	-	204	newintron	37	51	22	44	26	7	inf	inf	inf	inf	inf	inf
RPS4A	yes	X	702087	702227	GTTCA_GTAAG	-	140	newintron_introncontaining	38	12	26	39	6	5	0.000253303	8.25e-05	0.000251615	0.000279605	3.95e-05	3.62e-05
SYN8	no	I	128525	129021	GTATG_AACAG	-	496	newintron	39	47	27	11	5	10	0.00648185	0.00804196	0.00621578	0.0022229	0.000969809	0.002618
RPL30	no	VII	439382	439475	GTAAG_TTGAG	+	93	newintron_introncontaining	40	56	12	35	47	28	0.000192597	0.000294723	9.82e-05	0.000212421	0.00021998	0.00016284
LSR1	no	II	680945	680967	GTTCT_AGGAG	-	22	newintron	41	23	8	22	37	9	2.89e-05	1.69e-05	7.73e-06	1.34e-05	3.45e-05	9.59e-06
EGT2	yes	XIV	26746	26859	GTGCC_AGTAG	+	113	newintron	42	39	37	56	27	53	0.00831497	0.00743417	0.00696369	0.00845229	0.00430366	0.00931301
YGL188C-A	no	VII	148599	148969	GTAGT_ATTAG	-	370	newintron	42	17	1	1	1	1	0.0045624	0.00158427	0.000141566	0.000102471	8.56e-05	0.000100213
INP53	no	XV	525334	526838	GTATG_TAAAG	+	1504	newintron	43	13	1	2	1	1	0.00985466	0.00270854	0.000290103	0.000443673	0.000262	0.000270002
NOP1	yes	IV	427413	427466	GTGGC_CAGAG	+	53	newintron	43	40	23	76	51	40	0.00234653	0.00216022	0.00226926	0.00482971	0.00293926	0.00252455
EST1	no	XII	609403	609496	GTATG_TTCAG	-	93	newintron	48	79	25	37	1	1	0.0339502	0.0497148	0.0223519	0.0201757	0.000675434	0.000697688
FLO1	yes	I	206113	206382	GTCTA_TGAAG	+	269	newintron	49	65	52	121	44	59	0.104283	0.116606	0.320331	0.479222	0.189735	0.299149
YLR049C	no	XII	244986	245149	GTACG_AATAG	-	163	newintron	53	15	17	37	8	5	0.0255972	0.00596722	0.00901788	0.0135794	0.00451427	0.00276302
TIF3	yes	XVI	869107	869184	GTTGA_AAGAG	-	77	newintron	55	16	12	11	14	19	0.00253391	0.000770355	0.0006834	0.000469329	0.000661411	0.00097261
PDC1	yes	XII	233643	233885	GTATG_CCCAG	-	242	newintron	59	69	28	57	50	44	9.34e-05	0.000112387	5.29e-05	7.6e-05	7.48e-05	7e-05
ADE2	no	XV	565946	566193	GTATG_TAAAG	-	247	newintron	70	86	17	38	1	1	0.0112549	0.0128244	0.00554259	0.00746105	0.000358922	0.000361117
SYN8	no	I	128522	129021	GTATG_AGCAG	-	499	newintron	72	119	29	34	24	22	0.0119665	0.0203616	0.00667621	0.00687078	0.00465508	0.0057596
CPA2	no	X	632987	633060	GTATG_ATTAG	-	73	newintron	74	49	7	49	91	46	0.0105956	0.00694407	0.000958319	0.00472321	0.0073274	0.00377212
NOP1	yes	IV	427467	427520	GTGGC_CAGAG	+	53	newintron	80	88	38	56	63	62	0.00436564	0.00475248	0.00374921	0.00355873	0.00363085	0.00391305
UBI4	yes	XII	64193	64648	GTATT_GGAAG	-	455	newintron	82	63	59	100	18	35	0.00404212	0.00299615	0.00284153	0.00342243	0.00158387	0.00322089
YPL162C	no	XVI	243490	244025	GTATG_AGAAG	-	535	newintron	82	51	62	94	36	28	0.0304265	0.0170435	0.0261084	0.0291794	0.0143582	0.0112708
RPS4A	yes	X	702438	702587	GTTAG_GTAAG	-	149	newintron_introncontaining	85	53	7	33	146	30	0.000566599	0.000364538	6.77e-05	0.000236589	0.000961316	0.000217492
PUS7	no	XV	791676	792015	GTAAG_AATAG	-	339	newintron	99	54	26	54	7	22	0.0212376	0.00923841	0.0060538	0.00912023	0.00159987	0.00537692
PUS7	no	XV	791693	792015	GTAAG_TTAAG	-	322	newintron	105	92	144	90	2	14	0.0225247	0.0157395	0.0335287	0.0152004	0.000457105	0.00342167
FES1	no	II	443706	443833	GTATG_AATAG	-	127	newintron	110	157	270	348	224	270	0.0130669	0.0168545	0.0390119	0.0375893	0.0315254	0.0377602
RPS1B	yes	XIII	146929	147201	GTTAA_AAAAG	+	272	newintron	112	143	70	116	83	78	0.000467669	0.000582886	0.000410494	0.000495263	0.000353716	0.000336481
PRP5	yes	II	691967	692125	GTATG_AGAAG	+	158	newintron	120	140	228	151	157	101	0.0404665	0.0384076	0.0728942	0.0342188	0.0653757	0.0428212
PEX4	no	VII	756948	757152	GTATG_CCTAG	+	204	newintron	120	116	1	1	1	1	0.0155201	0.0143216	0.000217237	0.000171375	0.000181878	0.000212799
UBI4	yes	XII	64877	65104	GTATC_GGAAG	-	227	newintron	124	91	70	127	39	58	0.00611247	0.00432778	0.0033713	0.00434649	0.00343172	0.00533747
RPS23B	no	XVI	795699	795760	GTCGT_CCAAG	+	61	newintron_introncontaining	124	67	92	95	127	58	0.00092975	0.000486903	0.00103824	0.00077008	0.00103311	0.000494461
MRM2	yes	VII	253186	253248	GTATG_TTTAG	-	62	newintron	170	247	166	238	173	134	0.0731321	0.10078	0.0730939	0.089162	0.081395	0.0621481
RPL30	no	VII	439382	439479	GTAAG_GAAAG	+	97	newintron_introncontaining	394	424	147	246	399	273	0.00189708	0.00223147	0.0012029	0.00149302	0.00186749	0.00158769
SCR1	no	V	442122	442447	GTGGC_ATCAG	+	325	newintron	1525	1641	568	952	1544	1056	0.0073	0.008	0.0046	0.005	0.007	0.006
PRP5	no	II	691967	692133	GTATG_AGCAG	+	166	newintron	968	1067	699	1252	748	739	0.277533	0.292721	0.223478	0.283721	0.311472	0.313315
SNR17B	no	XVI	281374	281503	GTATG_AACAG	-	129	ncRNA_int	54942	50785	14156	29392	23922	20317	0.280667	0.279775	0.222631	0.211502	0.229838	0.195103
YRO2	no	II	342699	342789	GTGTG_TCAAG	+	90	newintron	1	7	10	16	28	5	0.00395257	0.0223642	0.00517598	0.00565471	0.0146712	0.00283286
PRP5	no	II	691967	692145	GTATG_AAAAG	+	178	newintron	1	17	14	22	20	6	0.000337221	0.00466378	0.00447596	0.00498552	0.00832812	0.00254383
CFT1	yes	IV	1063188	1063340	GTAAG_TCTAG	+	152	newintron	1	17	19	14	1	1	0.000532356	0.00769479	0.00887274	0.0049545	0.000618738	0.000639893
OXA1	yes	V	475904	475969	GTCCG_TTGAG	+	65	newintron	1	6	32	19	1	1	0.000164815	0.00110194	0.00426987	0.00221277	0.000187053	0.000206656
RIM8	no	VII	414246	414333	GTATG_GCTAG	+	87	newintron	1	1	22	9	1	1	0.00111597	0.00114873	0.0317297	0.0084754	0.00131713	0.0013888
MTC6	yes	VIII	400536	400850	GTATG_CGAAG	-	314	newintron	1	1	23	10	1	1	0.000418528	0.000420605	0.0123462	0.00371996	0.000471648	0.00049417
HSC82	yes	XIII	633003	633041	GTTCC_AAAAG	+	38	newintron	1	15	15	14	1	10	6.58e-06	8.67e-05	9.5e-05	6.21e-05	5.46e-06	5.73e-05
RSB1	no	XV	423658	423734	GTATG_TACAG	-	76	newintron	1	1	15	19	1	1	0.028875	0.0252	0.00400964	0.00455842	0.00525	0.00587288
PEP4	no	XVI	260916	261057	GTATA_GAAAG	-	141	newintron	1	1	13	9	1	1	3.57e-05	3.68e-05	0.00049278	0.000264411	5.55e-05	6.11e-05
VPS74	no	IV	1222247	1222388	GTACG_ATTAG	-	141	newintron	1	3	16	11	8	1	0.000243207	0.000531881	0.00260275	0.00124541	0.00156225	0.000172572
FLO1	yes	I	205978	206247	GTCTA_TGAAG	+	269	newintron	1	5	7	13	7	11	0.00212823	0.00896967	0.0431215	0.0514867	0.030185	0.0557736
PET54	no	VII	939701	939852	GTATT_AATAG	+	151	newintron	1	1	10	23	7	1	0.000542373	0.000529412	0.00459037	0.00781132	0.00316981	0.000473528
BUD31	no	III	228572	228701	GTATG_CACAG	+	129	newintron	2	9	13	9	1	1	0.000379892	0.00211037	0.00377857	0.0021446	0.000250949	0.000289229
PGK1	no	III	138478	138676	GTTTT_GCAAG	+	198	newintron	2	9	7	9	29	1	7.73e-06	3.47e-05	2.22e-05	1.97e-05	8.82e-05	3.26e-06
IDP3	no	XIV	616067	616412	GTATG_CAAAG	+	345	newintron	2	1	31	34	1	11	0.00290547	0.00118506	0.0521429	0.0393656	0.00172373	0.0146935
FOB1	no	IV	676272	676405	GTACG_TGCAG	+	133	newintron	4	18	7	13	20	34	0.00364662	0.0159963	0.00702899	0.00893692	0.0215915	0.0335674
UBI4	yes	XII	64529	64756	GTGGT_GAGAG	-	227	newintron	7	5	6	7	8	5	0.000345059	0.00023779	0.000288969	0.00023957	0.000703943	0.000460127
HMO1	no	IV	812389	812476	GCTGT_TCAAG	+	87	newintron	7	1	11	23	1	1	0.000287295	4.48e-05	0.000617761	0.0010631	4.61e-05	5.35e-05
VMR1	yes	VIII	30779	31603	GTATG_TCCAG	-	824	newintron	7	1	19	10	1	10	0.00482696	0.000493257	0.00625987	0.00257772	0.000557353	0.00447987
HPF1	yes	XV	31159	31221	GTTCA_ATCAG	-	62	newintron	8	5	7	16	4	12	0.00343158	0.0026786	0.00624036	0.0137073	0.00311413	0.0110739
UBI4	yes	XII	64757	64984	GTGGT_GAGAG	-	227	newintron	10	4	7	11	5	5	0.000492941	0.000190232	0.00033713	0.000376467	0.000439964	0.000460127
YJR015W	no	X	462705	463585	GTAAG_TGCAG	+	880	newintron	17	5	20	11	14	1	0.00290989	0.000947466	0.00482987	0.00201157	0.00283028	0.000234332
RPL3	yes	XV	444978	445496	GTTTG_AAGAG	+	518	newintron	21	1	34	21	23	15	6.74e-05	3.21e-06	0.000169125	7.34e-05	7.52e-05	5.27e-05
YPL168W	yes	XVI	231431	231577	GTAAG_AACAG	+	146	newintron	21	3	42	8	2	3	0.024	0.00327675	0.04727	0.00652342	0.00307054	0.00425287
FLO1	yes	I	205708	206247	GTCTA_TGAAG	+	539	newintron	26	4	8	28	15	13	0.0553339	0.00717574	0.0492817	0.110894	0.0646822	0.0659143
RPS4A	no	X	702119	702347	GTCAA_ACAAG	-	228	newintron_introncontaining	28	1	14	20	20	14	0.000186644	6.88e-06	0.000135485	0.000143387	0.000131687	0.000101496
RPL27A	no	VIII	127176	127264	GTTCC_AGAAG	+	88	newintron_introncontaining	1	1	14	6	21	6	8.87e-06	8.39e-06	0.000181876	6.02e-05	0.000186086	5.6e-05
POL32	yes	X	517540	517614	GTACG_AATAG	-	74	newintron	1	13	1	1	6	11	0.00124147	0.0121071	0.000848466	0.000793005	0.00570309	0.0101691
CPA2	yes	X	632977	633060	GTATG_TAAAG	-	83	newintron	1	12	1	46	11	8	0.000143183	0.00170059	0.000136903	0.00443403	0.000885729	0.000656022
RPS4A	yes	X	702180	702347	GTCAA_TCAAG	-	167	newintron_introncontaining	1	11	1	1	14	14	6.67e-06	7.57e-05	9.68e-06	7.17e-06	9.22e-05	0.000101496
RPS4A	no	X	702180	702418	GTAAG_TCAAG	-	238	newintron_introncontaining	1	11	1	1	8	8	6.67e-06	7.57e-05	9.68e-06	7.17e-06	5.27e-05	5.8e-05
INP53	no	XV	527185	527258	GTATG_AGCAG	+	73	newintron	1	1	7	1	7	12	0.000229178	0.000208349	0.00203072	0.000221837	0.001834	0.00324003
RET1	no	XV	733244	733416	GCATG_TACAG	-	172	newintron	1	1	1	1	24	36	0.000133638	0.000123582	0.000191629	0.000143637	0.00506714	0.00749461
SSE1	yes	XVI	351691	351771	GTTAG_AAAAG	-	80	newintron	1	1	1	1	19	11	1.08e-05	1.03e-05	1.27e-05	9.66e-06	0.000189999	0.000117367
EFT2	no	IV	1245537	1245738	GCCTA_GCAAG	+	201	newintron	1	15	2	6	37	8	1.43e-05	0.000216658	3.59e-05	7.79e-05	0.000500678	0.000117027
YDR387C	no	IV	1248111	1248258	GTATA_TTCAG	-	147	newintron	1	1	1	1	6	17	0.000260693	0.000277254	0.000252019	0.00018758	0.00163492	0.00482303
YIL102C-A	no	IX	173059	173606	GTCTG_AACAG	-	547	newintron	1	1	4	1	8	8	4.46e-05	4.07e-05	0.000245227	4.39e-05	0.000498906	0.000650036
SYG1	no	IX	266547	266647	GTTCA_ATTAG	-	100	newintron	1	1	1	1	18	10	0.000369366	0.000314432	0.00037868	0.00030397	0.00581981	0.00335314
TMN3	yes	V	389380	389448	GTTTT_GTCAG	-	68	newintron	1	1	1	1	11	13	0.000366955	0.000348849	0.000403002	0.000304173	0.00393772	0.00538325
RPS20	yes	VIII	75436	75501	GTTGA_CCAAG	+	65	newintron	1	15	1	28	16	18	4.65e-06	6.67e-05	7.05e-06	0.000142605	7.48e-05	9.04e-05
RPS20	yes	VIII	75502	75594	GTTAA_CCAAG	+	92	newintron	1	1	1	11	12	6	4.65e-06	4.45e-06	7.05e-06	5.6e-05	5.61e-05	3.01e-05
LSB6	no	X	236903	237023	GTATG_TGTAG	+	120	newintron	2	1	1	20	13	11	0.00135356	0.000765553	0.000802957	0.0109012	0.00661789	0.00644721
DML1	no	XIII	689779	689840	GCGGT_AAAAG	+	61	newintron	2	1	17	4	9	8	0.0012928	0.000471248	0.00962589	0.00157709	0.00554252	0.00569009
GAR1	yes	VIII	282866	283273	GTGGC_CCCAG	-	407	newintron	4	3	6	6	9	10	0.000542445	0.000416545	0.00123601	0.000804505	0.00111187	0.00126347
RPS4A	yes	X	702119	702313	GTAAG_ACAAG	-	194	newintron_introncontaining	5	8	1	3	32	11	3.33e-05	5.5e-05	9.68e-06	2.15e-05	0.000210699	7.97e-05
DCR2	yes	XII	848808	849095	GTACC_AAAAG	-	287	newintron	7	2	1	1	23	13	0.0022897	0.000605819	0.000409506	0.000286112	0.00831136	0.00438938
